# Supplementary material for: Burden of type 2 diabetes mellitus and its risk factors in North Africa and the Middle East, 1990–2019: findings from the Global Burden of Disease study 2019
Source: Springer Nature journal article supplement (doi:10.1186/s12889-023-16540-8), 2024-01-05
Supplement: MOESM1 [file 26600498]

| Data type             | Secondary data type                                                                                                                    | Coverage type | Geography                                                                                                                                                                                                                                                                                                                                                                                                                                                                                                                                                        | Time period covered | Suggested citation                                                                                                                                                                                                                                                                                                                                           |
|-----------------------|----------------------------------------------------------------------------------------------------------------------------------------|---------------|------------------------------------------------------------------------------------------------------------------------------------------------------------------------------------------------------------------------------------------------------------------------------------------------------------------------------------------------------------------------------------------------------------------------------------------------------------------------------------------------------------------------------------------------------------------|---------------------|--------------------------------------------------------------------------------------------------------------------------------------------------------------------------------------------------------------------------------------------------------------------------------------------------------------------------------------------------------------|
| Survey                | Cross-sectional, Household, Individual, Interview, Nationally representative, Subnationally representative, Urban-rural representative | Country       | Afghanistan                                                                                                                                                                                                                                                                                                                                                                                                                                                                                                                                                      | 08/2012 to 12/2012  | Indian Institute of Health Management Research (IIHMR), Johns Hopkins University, Ministry of Public Health (Afghanistan). Afghanistan Health Survey 2012.                                                                                                                                                                                                   |
| Survey                | Cross-sectional, Household, Interview, Subnationally representative, Urban-rural representative, Verbal autopsy                        | Country       | Afghanistan                                                                                                                                                                                                                                                                                                                                                                                                                                                                                                                                                      | 07/2015 to 12/2015  | Ministry of Public Health (Afghanistan), Royal Tropical Institute. Afghanistan Health Survey 2015.                                                                                                                                                                                                                                                           |
| Survey                | Community, Cross-sectional, Household, Individual, Interview, Nationally representative, Urban-rural representative, Verbal autopsy    | Country       | Afghanistan                                                                                                                                                                                                                                                                                                                                                                                                                                                                                                                                                      | 04/2010 to 12/2010  | Central Statistics Organization (Afghanistan), ICF Macro, Indian Institute of Health Management Research (IIHMR), Ministry of Public Health (Afghanistan), World Health Organization Regional Office for the Eastern Mediterranean (EMRO-WHO). Afghanistan Special Demographic and Health Survey 2010. Fairfax, United States of America: ICF International. |
| Survey                | Household, Individual, Nationally representative                                                                                       | Country       | Afghanistan                                                                                                                                                                                                                                                                                                                                                                                                                                                                                                                                                      | 02/2018 to 10/2018  | Ministry of Public Health (Afghanistan), World Health Organization (WHO). Afghanistan STEPS Noncommunicable Disease Risk Factors Survey 2018. Geneva, Switzerland: World Health Organization (WHO).                                                                                                                                                          |
| Survey                | Household                                                                                                                              | Subnational   | Algeria, Mostaganem, Sv@tif                                                                                                                                                                                                                                                                                                                                                                                                                                                                                                                                      | 01/2003 to 12/2003  | Ministry of Health, Population and Hospital Reform (Algeria), World Health Organization (WHO). Algeria - Sv@tif and Mostaganem STEPS Noncommunicable Disease Risk Factors Survey 2003.                                                                                                                                                                       |
| Report                | Verbal autopsy                                                                                                                         | Country       | Algeria                                                                                                                                                                                                                                                                                                                                                                                                                                                                                                                                                          | 01/2002 to 12/2002  | Epidemiological Transition and Health Impact in North Africa (TAHINA), Ministry of Health and Population (Algeria), National Institute of Public Health (Algeria). Algeria - Study of Causes of Death, TAHINA 2002. Alger, Algeria: National Institute of Public Health (Algeria), 2008.                                                                     |
| Survey                | Household                                                                                                                              | Country       | Algeria                                                                                                                                                                                                                                                                                                                                                                                                                                                                                                                                                          | 09/2002 to 01/2003  | National Office of Statistics (Algeria), Ministry of Health, Population and Hospital Reform (Algeria), League of Arab States. Algeria Family Health Survey 2002-2003.                                                                                                                                                                                        |
| Survey                | Cross-sectional, Household, Individual, Interview, Nationally representative, Urban-rural representative                               | Country       | Algeria                                                                                                                                                                                                                                                                                                                                                                                                                                                                                                                                                          | 03/2006 to 06/2006  | Joint United Nations Program on HIV/AIDS (UNAIDS), Ministry of Health, Population and Hospital Reform (Algeria), National Office of Statistics (Algeria), United Nations Children's Fund (UNICEF), United Nations Population Fund (UNFPA). Algeria Multiple Indicator Cluster Survey 2006.                                                                   |
| Survey                | Cross-sectional, Household, Individual, Interview, Nationally representative, Subnationally representative, Urban-rural representative | Country       | Algeria                                                                                                                                                                                                                                                                                                                                                                                                                                                                                                                                                          | 10/2012 to 01/2013  | Ministry of Health and Population (Algeria), United Nations Children's Fund (UNICEF). Algeria Multiple Indicator Cluster Survey 2012-2013. New York, United States of America: United Nations Children's Fund (UNICEF), 2018.                                                                                                                                |
| Survey                | Cross-sectional, Household, Individual, Interview, Urban-rural representative                                                          | Country       | Algeria                                                                                                                                                                                                                                                                                                                                                                                                                                                                                                                                                          | 06/2005 to 07/2005  | National Institute of Public Health, Ministry of Health, Population, and Hospital Reform (Algeria). Algeria National Health Survey 2005.                                                                                                                                                                                                                     |
| Survey                | Household                                                                                                                              | Subnational   | Algeria                                                                                                                                                                                                                                                                                                                                                                                                                                                                                                                                                          | 11/2016 to 06/2017  | Ministry of Health, Population and Hospital Reform (Algeria), World Health Organization (WHO). Algeria STEPS Noncommunicable Disease Risk Factors Survey 2016-2017.                                                                                                                                                                                          |
| Scientific literature | NA                                                                                                                                     | NA            | Algeria                                                                                                                                                                                                                                                                                                                                                                                                                                                                                                                                                          | 01/1973 to 12/2017  | Touhami M, Zennaki A, Bouchetara A, Naceur M, Aoui A, Gharnouti M, Latroch C, Bouziane-Nedjadi K, Boudraa G. Epidemiological Evolution of Type 1 Diabetes in Children: Data from the Register of the Department of Oran, Algeria, 1973-2017. Rev Epidemiol Sante Publique. 2019; 67(6): 369-374.                                                             |
| Scientific literature | NA                                                                                                                                     | NA            | Algeria, Argentina, Australia, Austria, Barbados, Belgium, Brazil, Bulgaria, Canada, Chile, China, Colombia, Cuba, Denmark, Dominica, Estonia, Finland, France, Germany, Greece, Hungary, Israel, Italy, Japan, Kuwait, Latvia, Lithuania, Luxembourg, Mauritius, Mexico, Netherlands, New Zealand, Norway, Pakistan, Paraguay, Peru, Poland, Portugal, Romania, Russian Federation, Slovakia, Slovenia, Spain, Sudan, Tunisia, United Kingdom, United States of America, Puerto Rico, United States Virgin Islands, Uruguay, Venezuela (Bolivarian Republic of) | 01/2000 to 12/2000  | Karvonen M, Viik-Kajander M, Moltchanova E, Libman I, LaPorte R, Tuomilehto J. Incidence of childhood type 1 diabetes worldwide. Diabetes Mondiale (DiaMond) Project Group. Diabetes Care. 2000; 23(10): 1516-1526.                                                                                                                                          |

| Data type             | Secondary data type                                | Coverage type | Geography                                                                                                                                                                                                                                                                                                                      | Time period covered | Suggested citation                                                                                                                                                                                                                                                          |
|-----------------------|----------------------------------------------------|---------------|--------------------------------------------------------------------------------------------------------------------------------------------------------------------------------------------------------------------------------------------------------------------------------------------------------------------------------|---------------------|-----------------------------------------------------------------------------------------------------------------------------------------------------------------------------------------------------------------------------------------------------------------------------|
| Scientific literature | NA                                                 | NA            | Algeria                                                                                                                                                                                                                                                                                                                        | 01/2001 to 12/2001  | Temmar M, Labat C, Benkhedda S, Charifi M, Thomas F, Bouafia MT, Bean K, Darne B, Safar ME, Benetos A. Prevalence and determinants of hypertension in the Algerian Sahara. <i>J Hypertens.</i> 2007; 25(11): 2218-26.                                                       |
| Scientific literature | NA                                                 | Country       | Algeria, Argentina, Bahrain, Bangladesh, China, Egypt, India, Indonesia, Iran (Islamic Republic of), Jordan, Kuwait, Libya, Malaysia, Mexico, Morocco, Pakistan, Philippines, Qatar, Russian Federation, Saudi Arabia, Singapore, Republic of Korea, Taiwan (Province of China), Tunisia, Turkiye, United Arab Emirates, Yemen | 01/2009 to 12/2010  | Litwak L, Goh SY, Hussein Z, Malek R, Prusty V, Khamseh ME. Prevalence of diabetes complications in people in type 2 diabetes mellitus and its association with baseline characteristics in the multinational A1chieve study . <i>Diabetol Metab Syndr.</i> 2013; 5(1): 57. |
| Survey                | Household, Individual, Interview                   | Country       | Bahrain                                                                                                                                                                                                                                                                                                                        | 10/1995 to 12/1995  | Ministry of Health (Bahrain), Council of Health Ministers of GCC States. Bahrain Family Health Survey 1995. Manama, Bahrain: Ministry of Health (Bahrain).                                                                                                                  |
| Report                | Discharge, Inpatient, Outpatient                   | Country       | Bahrain                                                                                                                                                                                                                                                                                                                        | 01/1996 to 12/2000  | Ministry of Health (Bahrain). Bahrain Health Statistics 2000. Juffair, Bahrain: Ministry of Health (Bahrain).                                                                                                                                                               |
| Report                | Epi surveillance, Subnationally representative     | Country       | Bahrain                                                                                                                                                                                                                                                                                                                        | 01/2009 to 12/2013  | Ministry of Health (Bahrain). Bahrain Health Statistics 2013. Juffair, Bahrain: Ministry of Health (Bahrain).                                                                                                                                                               |
| Report                | Epi surveillance                                   | Country       | Bahrain                                                                                                                                                                                                                                                                                                                        | 01/2011 to 12/2015  | Ministry of Health (Bahrain). Bahrain Health Statistics 2015. Juffair, Bahrain: Ministry of Health (Bahrain).                                                                                                                                                               |
| Report                | Epi surveillance                                   | Country       | Bahrain                                                                                                                                                                                                                                                                                                                        | 01/2012 to 12/2016  | Ministry of Health (Bahrain). Bahrain Health Statistics 2016. Juffair, Bahrain: Ministry of Health (Bahrain).                                                                                                                                                               |
| Report                | Discharge, Epi surveillance, Inpatient, Outpatient | Country       | Bahrain                                                                                                                                                                                                                                                                                                                        | 01/2007 to 12/2017  | Ministry of Health (Bahrain). Bahrain Health Statistics 2017. Juffair, Bahrain: Ministry of Health (Bahrain).                                                                                                                                                               |
| Survey                | NA                                                 | Country       | Bahrain                                                                                                                                                                                                                                                                                                                        | 01/1998 to 12/1999  | Ministry of Health (Bahrain). Bahrain National Nutrition Survey 1998-1999.                                                                                                                                                                                                  |
| Survey                | Household                                          | Country       | Bahrain                                                                                                                                                                                                                                                                                                                        | 01/2007 to 12/2007  | Ministry of Health (Bahrain), World Health Organization (WHO). Bahrain STEPS Noncommunicable Disease Risk Factors Survey 2007.                                                                                                                                              |
| Scientific literature | NA                                                 | NA            | Bahrain                                                                                                                                                                                                                                                                                                                        | 01/2005 to 12/2005  | Al-Mahroos F, Al-Roomi K. Diabetic neuropathy, foot ulceration, peripheral vascular disease and potential risk factors among patients with diabetes in Bahrain: a nationwide primary care diabetes clinic-based study. <i>Ann Saudi Med.</i> 2007; 27(1): 25-31.            |
| Scientific literature | NA                                                 | NA            | Bahrain                                                                                                                                                                                                                                                                                                                        | 01/1996 to 12/1996  | al-Mahroos F, McKeigue PM. High prevalence of diabetes in Bahrainis. Associations with ethnicity and raised plasma cholesterol. <i>Diabetes Care.</i> 1998; 21(6): 936-42.                                                                                                  |
| Scientific literature | NA                                                 | Country       | Algeria, Argentina, Bahrain, Bangladesh, China, Egypt, India, Indonesia, Iran (Islamic Republic of), Jordan, Kuwait, Libya, Malaysia, Mexico, Morocco, Pakistan, Philippines, Qatar, Russian Federation, Saudi Arabia, Singapore, Republic of Korea, Taiwan (Province of China), Tunisia, Turkiye, United Arab Emirates, Yemen | 01/2009 to 12/2010  | Litwak L, Goh SY, Hussein Z, Malek R, Prusty V, Khamseh ME. Prevalence of diabetes complications in people in type 2 diabetes mellitus and its association with baseline characteristics in the multinational A1chieve study . <i>Diabetol Metab Syndr.</i> 2013; 5(1): 57. |
| Scientific literature | NA                                                 | NA            | Bahrain                                                                                                                                                                                                                                                                                                                        | 01/2003 to 12/2009  | Al Alawi E, Ahmed AA. Screening for diabetic retinopathy: the first telemedicine approach in a primary care setting in Bahrain. <i>Middle East Afr J Ophthalmol.</i> 2012; 19(3): 295-8.                                                                                    |
| Scientific literature | NA                                                 | NA            | Canada, Egypt, Finland, Japan, Netherlands, Republic of Korea, Sweden, Taiwan (Province of China), United Kingdom, United States of America, Hawaii                                                                                                                                                                            | 01/1996 to 05/2016  | Zhang J, Chen C, Hua S, Liao H, Wang M, Xiong Y, Cao F. An updated meta-analysis of cohort studies: diabetes and risk of Alzheimer's disease. <i>Diabetes Res Clin Pract.</i> 2017; Feb (124): 41-47.                                                                       |

| Data type             | Secondary data type                                                                                 | Coverage type | Geography                                                                                                                                                                                                                                                                                                                      | Time period covered | Suggested citation                                                                                                                                                                                                                                                   |
|-----------------------|-----------------------------------------------------------------------------------------------------|---------------|--------------------------------------------------------------------------------------------------------------------------------------------------------------------------------------------------------------------------------------------------------------------------------------------------------------------------------|---------------------|----------------------------------------------------------------------------------------------------------------------------------------------------------------------------------------------------------------------------------------------------------------------|
| Scientific literature | NA                                                                                                  | NA            | Egypt                                                                                                                                                                                                                                                                                                                          | 01/1985 to 12/1985  | Arab M. Diabetes mellitus in Egypt. World Health Stat Q. 1992; 45(4): 334-7.                                                                                                                                                                                         |
| Survey                | Cross-sectional, GPS coordinates (GIS), Household, Individual, Interview, Nationally representative | Country       | Egypt                                                                                                                                                                                                                                                                                                                          | 03/2008 to 06/2008  | El-Zanaty and Associates, Macro International, Inc, Ministry of Health and Population (Egypt). Egypt Demographic and Health Survey 2008. Fairfax, United States of America: ICF International.                                                                       |
| Survey                | Household, Individual, Longitudinal                                                                 | Country       | Egypt                                                                                                                                                                                                                                                                                                                          | 10/1996 to 11/1997  | Macro International, Inc, Population Council (Egypt). Egypt In Depth Demographic and Health Survey 1996-1997. Fairfax, United States of America: ICF International.                                                                                                  |
| Survey                | Cross-sectional, Household, Individual, Interview                                                   | Country       | Egypt                                                                                                                                                                                                                                                                                                                          | 02/2015 to 05/2015  | El-Zanaty and Associates, ICF International, Ministry of Health and Population (Egypt), Population Council (Egypt). Egypt Special Demographic and Health Survey 2015. Fairfax, United States of America: ICF International.                                          |
| Report                | NA                                                                                                  | Country       | Egypt                                                                                                                                                                                                                                                                                                                          | 01/1960 to 12/2005  | Central Agency for Public Mobilization and Statistics (CAPMAS) (Egypt). Egypt Statistical Yearbook 2005. Cairo, Egypt: Central Agency for Public Mobilization and Statistics (CAPMAS) (Egypt), 2006.                                                                 |
| Report                | NA                                                                                                  | Country       | Egypt                                                                                                                                                                                                                                                                                                                          | 01/1960 to 12/2008  | Central Agency for Public Mobilization and Statistics (CAPMAS) (Egypt). Egypt Statistical Yearbook 2009. Cairo, Egypt: Central Agency for Public Mobilization and Statistics (CAPMAS) (Egypt), 2009.                                                                 |
| Report                | NA                                                                                                  | Country       | Egypt                                                                                                                                                                                                                                                                                                                          | 01/1960 to 12/2009  | Central Agency for Public Mobilization and Statistics (CAPMAS) (Egypt). Egypt Statistical Yearbook 2010. Cairo, Egypt: Central Agency for Public Mobilization and Statistics (CAPMAS) (Egypt), 2010.                                                                 |
| Report                | NA                                                                                                  | Country       | Egypt                                                                                                                                                                                                                                                                                                                          | 01/1960 to 12/2010  | Central Agency for Public Mobilization and Statistics (CAPMAS) (Egypt). Egypt Statistical Yearbook 2011. Cairo, Egypt: Central Agency for Public Mobilization and Statistics (CAPMAS) (Egypt), 2011.                                                                 |
| Report                | NA                                                                                                  | Country       | Egypt                                                                                                                                                                                                                                                                                                                          | 01/1960 to 12/2011  | Central Agency for Public Mobilization and Statistics (CAPMAS) (Egypt). Egypt Statistical Yearbook 2012. Cairo, Egypt: Central Agency for Public Mobilization and Statistics (CAPMAS) (Egypt), 2012.                                                                 |
| Report                | NA                                                                                                  | Country       | Egypt                                                                                                                                                                                                                                                                                                                          | 01/1960 to 12/2012  | Central Agency for Public Mobilization and Statistics (CAPMAS) (Egypt). Egypt Statistical Yearbook 2013. Cairo, Egypt: Central Agency for Public Mobilization and Statistics (CAPMAS) (Egypt), 2013.                                                                 |
| Report                | NA                                                                                                  | Country       | Egypt                                                                                                                                                                                                                                                                                                                          | 01/1960 to 12/2016  | Central Agency for Public Mobilization and Statistics (CAPMAS) (Egypt). Egypt Statistical Yearbook 2017. Cairo, Egypt: Central Agency for Public Mobilization and Statistics (CAPMAS) (Egypt), 2017.                                                                 |
| Survey                | Household                                                                                           | Country       | Egypt                                                                                                                                                                                                                                                                                                                          | 01/2005 to 12/2005  | Ministry of Health and Population (Egypt), United States Agency for International Development (USAID), World Health Organization (WHO). Egypt STEPS Noncommunicable Disease Risk Factors Survey 2005.                                                                |
| Survey                | Household, Interview                                                                                | Country       | Egypt                                                                                                                                                                                                                                                                                                                          | 11/2011 to 01/2012  | Ministry of Health and Population (Egypt), United States Agency for International Development (USAID), World Health Organization (WHO). Egypt STEPS Noncommunicable Disease Risk Factors Survey 2011-2012.                                                           |
| Survey                | Cross-sectional, Household, Individual, Interview, Nationally representative                        | Country       | Egypt                                                                                                                                                                                                                                                                                                                          | 07/2017 to 10/2017  | Central Agency for Public Mobilization and Statistics (CAPMAS) (Egypt), Ministry of Health and Population (Egypt), World Health Organization (WHO). Egypt STEPS Noncommunicable Disease Risk Factors Survey 2017.                                                    |
| Survey                | Community, Household, Nationally representative                                                     | Country       | Egypt                                                                                                                                                                                                                                                                                                                          | 01/2009 to 12/2009  | Information and Decision Support Center (IDSC) (Egypt), Population Council. Egypt Survey of Young People 2009. New York City , United States of America: Population Council.                                                                                         |
| Scientific literature | NA                                                                                                  | NA            | Egypt                                                                                                                                                                                                                                                                                                                          | 01/1996 to 12/2011  | El-Ziny MA, Salem NA, El-Hawary AK, Chalaby NM, Elsharkawy AA. Epidemiology of childhood type 1 diabetes mellitus in Nile Delta, northern Egypt - a retrospective study. J Clin Res Pediatr Endocrinol. 2014; 6(1): 9-15.                                            |
| Scientific literature | NA                                                                                                  | NA            | Egypt                                                                                                                                                                                                                                                                                                                          | 01/2007 to 12/2008  | Macky TA, Khater N, Al-Zamil MA, El Fishawy H, Soliman MM. Epidemiology of diabetic retinopathy in Egypt: a hospital-based study. Ophthalmic Res. 2011; 45(2): 73-8.                                                                                                 |
| Scientific literature | NA                                                                                                  | NA            | Egypt                                                                                                                                                                                                                                                                                                                          | 01/2004 to 12/2004  | Marzouk D, Sass J, Bakr I, El Hosseiny M, Abdel-Hamid M, Rekacewicz C, Chaturvedi N, Mohamed MK, Fontanet A. Metabolic and cardiovascular risk profiles and hepatitis C virus infection in rural Egypt. Gut. 2007; 56(8): 1105-10.                                   |
| Scientific literature | NA                                                                                                  | NA            | Egypt                                                                                                                                                                                                                                                                                                                          | 01/2013 to 12/2015  | Khedr EM, Fawi G, Allah Abbas MA, El-Fetoh NA, Al Attar G, Zaki AF, Gamea A. Prevalence of Diabetes and Diabetic Neuropathy in Qena Governorate: Population-Based Survey. Neuroepidemiology. 2016; 46(3): 173-181.                                                   |
| Scientific literature | NA                                                                                                  | Country       | Algeria, Argentina, Bahrain, Bangladesh, China, Egypt, India, Indonesia, Iran (Islamic Republic of), Jordan, Kuwait, Libya, Malaysia, Mexico, Morocco, Pakistan, Philippines, Qatar, Russian Federation, Saudi Arabia, Singapore, Republic of Korea, Taiwan (Province of China), Tunisia, Turkiye, United Arab Emirates, Yemen | 01/2009 to 12/2010  | Litwak L, Goh SY, Hussein Z, Malek R, Prusty V, Khamseh ME. Prevalence of diabetes complications in people in type 2 diabetes mellitus and its association with baseline characteristics in the multinational A1chieve study . Diabetol Metab Syndr. 2013; 5(1): 57. |

| Data type             | Secondary data type                                                  | Coverage type | Geography                             | Time period covered | Suggested citation                                                                                                                                                                                                                                                                                                                                                                                                          |
|-----------------------|----------------------------------------------------------------------|---------------|---------------------------------------|---------------------|-----------------------------------------------------------------------------------------------------------------------------------------------------------------------------------------------------------------------------------------------------------------------------------------------------------------------------------------------------------------------------------------------------------------------------|
| Scientific literature | NA                                                                   | NA            | Egypt, Jordan, Kuwait, Lebanon        | 01/2009 to 12/2009  | Jambart S, Ammache Z, Haddad F, Younes A, Hassoun A, Abdalla K, Selwan CA, Sunna N, Wajsbrot D, Youseif E. Prevalence of painful diabetic peripheral neuropathy among patients with diabetes mellitus in the Middle East region. <i>J Int Med Res.</i> 2011; 39(2): 366-77.                                                                                                                                                 |
| Scientific literature | NA                                                                   | NA            | Egypt                                 | 01/2006 to 12/2008  | Al-Emam A, Elhaddad AA, Ramadan E. The risk of clinically diagnosed alzheimer disease in patients with non insulin dependent diabetes mellitus. <i>Egypt J Neurol Psychiatr Neurosurg.</i> 2010; 47: 419,Äi24.                                                                                                                                                                                                              |
| Scientific literature | NA                                                                   | NA            | Iran (Islamic Republic of)            | 01/2006 to 12/2014  | Bahadoran Z, Mirmiran P, Momenan AA, Azizi F. Allium vegetable intakes and the incidence of cardiovascular disease, hypertension, chronic kidney disease, and type 2 diabetes in adults: a longitudinal follow-up study. <i>J Hypertens.</i> 2017; 35(9): 1909-1916.                                                                                                                                                        |
| Scientific literature | NA                                                                   | Subnational   | Iran (Islamic Republic of), Qazvín    | 01/2010 to 12/2011  | Ghorbani A, Ziaee A, Esmailzadehha N, Javadi H. Association between health-related quality of life and impaired glucose metabolism in Iran: the Qazvin Metabolic Diseases Study. <i>Diabet Med.</i> 2014; 31(6): 754,Äi8.                                                                                                                                                                                                   |
| Scientific literature | NA                                                                   | Subnational   | Iran (Islamic Republic of), TehrÅn    | 01/2006 to 12/2007  | Ghasemi A, Zahediasl S, Syedmoradi L, Azizi F. Association between serum nitric oxide metabolites and hypertension in a general population. <i>Int Angiol.</i> 2011; 30(4): 380,Äi7.                                                                                                                                                                                                                                        |
| Scientific literature | NA                                                                   | Subnational   | Iran (Islamic Republic of), E≈üfahfÅn | 01/2007 to 12/2012  | Najafian J, Mohamadifard N, Siadat ZD, Sadri G, Rahmati MR. Association between sleep duration and diabetes mellitus: Isfahan Healthy Heart Program. <i>Niger J Clin Pract.</i> 2013; 16(1): 59,Äi62.                                                                                                                                                                                                                       |
| Scientific literature | NA                                                                   | Subnational   | Iran (Islamic Republic of), E≈üfahfÅn | 01/2002 to 12/2010  | Janghorbani M, Amini M. Associations of hip circumference and height with incidence of type 2 diabetes: the Isfahan diabetes prevention study. <i>Acta Diabetol.</i> 2012; 49 Suppl 1: S107,Äi114.                                                                                                                                                                                                                          |
| Scientific literature | NA                                                                   | Subnational   | Iran (Islamic Republic of), E≈üfahfÅn | 01/2000 to 12/2001  | Shirani S, Kelishadi R, Sarrafzadegan N, Khosravi A, Sadri G, Amani A, Heidari S, Ramezani MA. Awareness, treatment and control of hypertension, dyslipidaemia and diabetes mellitus in an Iranian population: the IHHP study. <i>East Mediterr Health J.</i> 2009; 15(6): 1455,Äi63.                                                                                                                                       |
| Scientific literature | NA                                                                   | Subnational   | Iran (Islamic Republic of), B≈'shehr  | 01/2013 to 12/2014  | Ostovar A, Nabipour I, Larijani B, Heshmat R, Darabi H, Vahdat K, Ravanipour M, Mehrdad N, Raeisi A, Heidari G, Shafiee G, Haeri M, Pourbehi M, Sharifi F, Noroozi A, Tahmasebi R, Aghaei Meybodi H, Assadi M, Farrokhi S, Nemati R, Amini MR, Barekat M, Amini A, Salimpour H, Dobaradaran S, Moshtaghi D. Bushehr Elderly Health (BEH) Programme, phase I (cardiovascular system). <i>BMJ Open.</i> 2015; 5(12): e009597. |
| Scientific literature | NA                                                                   | NA            | Iran (Islamic Republic of)            | 01/2005 to 12/2005  | Alavi A, Sanjari M, Haghdoost A, Sibbald RG. Common foot examination features of 247 Iranian patients with diabetes. <i>Int Wound J.</i> 2009; 6(2): 117-22.                                                                                                                                                                                                                                                                |
| Scientific literature | NA                                                                   | Subnational   | Iran (Islamic Republic of), E≈üfahfÅn | 01/2003 to 12/2005  | Janghorbani M, Amini M. Comparison of fasting glucose with post-load glucose values and glycated hemoglobin for prediction of type 2 diabetes: the Isfahan diabetes prevention study. <i>Rev Diabet Stud.</i> 2009; 6(2): 117-23.                                                                                                                                                                                           |
| Scientific literature | NA                                                                   | Subnational   | Iran (Islamic Republic of), E≈üfahfÅn | 01/2001 to 12/2001  | Sadeghi M, Roohafza H, Shirani S, Poormoghadas M, Kelishadi R, Baghahi A, Sarraf-Zadegan N. Diabetes and associated cardiovascular risk factors in Iran: the Isfahan Healthy Heart Programme. <i>Ann Acad Med Singapore.</i> 2007; 36(3): 175-80.                                                                                                                                                                           |
| Scientific literature | NA                                                                   | NA            | Iran (Islamic Republic of)            | 01/2004 to 12/2004  | Golozar A, Khademi H, Kamangar F, Poutschi H, Islami F, Abnet CC, Freedman ND, Taylor PR, Pharoah P, Boffetta P, Brennan PJ, Dawsey SM, Malekzadeh R, Etemadi A. Diabetes mellitus and its correlates in an Iranian adult population. <i>PLoS One.</i> 2011; 6(10): e26725.                                                                                                                                                 |
| Scientific literature | NA                                                                   | Subnational   | Iran (Islamic Republic of), TehrÅn    | 01/2006 to 12/2008  | Mirmiran P, Hajifaraji M, Bahadoran Z, Sarvghadi F, Azizi F. Dietary protein intake is associated with favorable cardiometabolic risk factors in adults: Tehran Lipid and Glucose Study. <i>Nutr Res.</i> 2012; 32(3): 169,Äi76.                                                                                                                                                                                            |
| Scientific literature | NA                                                                   | NA            | Iran (Islamic Republic of)            | 01/2005 to 12/2005  | Farzadfar F, Murray CJL, Gakidou E, Bossert T, Namdaritabar H, Alikhani S, Moradi G, Delavari A, Jamshidi H, Ezzati M. Effectiveness of diabetes and hypertension management by rural primary health-care workers (Behvarz workers) in Iran: a nationally representative observational study. <i>Lancet.</i> 2012; 379(9810): 47,Äi54.                                                                                      |
| Scientific literature | NA                                                                   | NA            | Iran (Islamic Republic of)            | 01/2004 to 12/2007  | Manaviat MR, Rashidi M, Afkhami-Ardekani M. Four years incidence of diabetic retinopathy and effective factors on its progression in type II diabetes. <i>Eur J Ophthalmol.</i> 2008; 18(4): 572-7.                                                                                                                                                                                                                         |
| Scientific literature | NA                                                                   | NA            | Iran (Islamic Republic of)            | 01/2007 to 12/2007  | Haghighatdoost F, Sarrafzadegan N, Mohammadifard N, Sajjadi F, Maghroon M, Boshtam M, Alikhasi H, Azadbakht L. Healthy eating index and cardiovascular risk factors among Iranians. <i>J Am Coll Nutr.</i> 2013; 32(2): 111,Äi21.                                                                                                                                                                                           |
| Scientific literature | NA                                                                   | NA            | Iran (Islamic Republic of)            | 01/2009 to 12/2014  | Ebrahimi H, Emamian MH, Hashemi H, Fotouhi A. High Incidence of Diabetes Mellitus Among a Middle-Aged Population in Iran: A Longitudinal Study. <i>Can J Diabetes.</i> 2016; 40(6): 570,Äi5.                                                                                                                                                                                                                                |
| Scientific literature | NA                                                                   | NA            | France, Iran (Islamic Republic of)    | 01/1999 to 12/2003  | Azimi-Nezhad M, Herbeth B, Siest G, Dadv© S, Ndiaye NC, Esmaily H, Hosseini SJ, Ghayour-Mobarhan M, Visvikis-Siest S. High prevalence of metabolic syndrome in Iran in comparison with France: what are the components that explain this?. <i>Metab Syndr Relat Disord.</i> 2012; 10(3): 181,Äi8.                                                                                                                           |
| Scientific literature | NA                                                                   | Subnational   | Iran (Islamic Republic of), TehrÅn    | 01/1999 to 12/2001  | Hadaegh F, Shafiee G, Ghasemi A, Sarbakhsh P, Azizi F. Impact of metabolic syndrome, diabetes and prediabetes on cardiovascular events: Tehran lipid and glucose study. <i>Diabetes Res Clin Pract.</i> 2010; 87(3): 342,Äi7.                                                                                                                                                                                               |
| Scientific literature | NA                                                                   | Subnational   | Iran (Islamic Republic of), E≈üfahfÅn | 01/1992 to 12/2001  | Janghorbani M, Amini M, Ghanbari H, Safaiee H. Incidence of and risk factors for diabetic retinopathy in Isfahan, Iran. <i>Ophthalmic Epidemiol.</i> 2003; 10(2): 81-95.                                                                                                                                                                                                                                                    |
| Survey                | Household, Individual, Interview, Nationally representative          | Subnational   | Iran (Islamic Republic of), GolestfÅn | 01/2004 to 12/2008  | International Agency for Research on Cancer (IARC), National Cancer Institute (NCI) (United States), Tehran University of Medical Sciences. Iran - Golestan Cohort Study 2004-2008 - Teheran University of Medical Sciences.                                                                                                                                                                                                |
| Survey                | Cross-sectional, Individual, Interview, Subnationally representative | Subnational   | Iran (Islamic Republic of), FfÅrs     | Jan-13              | Digestive Diseases Research Institute (DDRI) (Iran), Shiraz University of Medical Sciences. Iran - Pars Cohort Study.                                                                                                                                                                                                                                                                                                       |

| Data type             | Secondary data type                                                          | Coverage type | Geography                                                                                                                                                                                                                                                                                                                      | Time period covered | Suggested citation                                                                                                                                                                                                                                                                                                                               |
|-----------------------|------------------------------------------------------------------------------|---------------|--------------------------------------------------------------------------------------------------------------------------------------------------------------------------------------------------------------------------------------------------------------------------------------------------------------------------------|---------------------|--------------------------------------------------------------------------------------------------------------------------------------------------------------------------------------------------------------------------------------------------------------------------------------------------------------------------------------------------|
| Survey                | Household                                                                    | Country       | Iran (Islamic Republic of)                                                                                                                                                                                                                                                                                                     | 01/2010 to 12/2010  | Ministry of Health and Medical Education (Iran), Statistical Centre of Iran. Iran Multiple Indicator Demographic and Health Survey 2010.                                                                                                                                                                                                         |
| Survey                | Longitudinal                                                                 | Country       | Iran (Islamic Republic of)                                                                                                                                                                                                                                                                                                     | Jan-02              | Hamilton Health Sciences, McMaster University (Canada), Population Health Research Institute (PHRI). Iran Prospective Urban and Rural Epidemiological Study.                                                                                                                                                                                     |
| Survey                | Cross-sectional, Household, Individual, Interview, Nationally representative | Country       | Iran (Islamic Republic of)                                                                                                                                                                                                                                                                                                     | 01/2005 to 02/2005  | World Health Organization (WHO), Ministry of Health and Medical Education (Iran), Center for Non-Communicable Diseases Control (Iran). Iran STEPS Noncommunicable Disease Risk Factors Survey 2005.                                                                                                                                              |
| Survey                | Cross-sectional                                                              | Country       | Iran (Islamic Republic of)                                                                                                                                                                                                                                                                                                     | 05/2006 to 06/2006  | Ministry of Health and Medical Education (Iran), World Health Organization (WHO). Iran STEPS Noncommunicable Disease Risk Factors Survey 2006.                                                                                                                                                                                                   |
| Survey                | Household                                                                    | Country       | Iran (Islamic Republic of)                                                                                                                                                                                                                                                                                                     | 05/2007 to 06/2007  | World Health Organization (WHO), Ministry of Health and Medical Education (Iran), Center for Non-Communicable Diseases Control (Iran). Iran STEPS Noncommunicable Disease Risk Factors Survey 2007.                                                                                                                                              |
| Survey                | Cross-sectional, Household                                                   | Country       | Iran (Islamic Republic of)                                                                                                                                                                                                                                                                                                     | May-08              | Ministry of Health and Medical Education (Iran), World Health Organization (WHO). Iran STEPS Noncommunicable Disease Risk Factors Survey 2008.                                                                                                                                                                                                   |
| Survey                | Household, Interview                                                         | Country       | Iran (Islamic Republic of)                                                                                                                                                                                                                                                                                                     | 01/2009 to 12/2009  | Ministry of Health and Medical Education (Iran), World Health Organization (WHO). Iran STEPS Noncommunicable Disease Risk Factors Survey 2009.                                                                                                                                                                                                   |
| Survey                | Individual, Nationally representative                                        | Country       | Iran (Islamic Republic of)                                                                                                                                                                                                                                                                                                     | 04/2016 to 11/2016  | Ministry of Health and Medical Education (Iran), National Institute of Health Research, Ministry of Health and Medical Education (Iran), Tehran University of Medical Sciences. Iran STEPS Noncommunicable Disease Risk Factors Survey 2016.                                                                                                     |
| Scientific literature | NA                                                                           | NA            | Iran (Islamic Republic of)                                                                                                                                                                                                                                                                                                     | 01/1991 to 12/1996  | Pishdad GR. Low incidence of type 1 diabetes in Iran. <i>Diabetes Care</i> . 2005; 28(4): 927-8.                                                                                                                                                                                                                                                 |
| Scientific literature | NA                                                                           | Country       | Colombia, Iran (Islamic Republic of), Mexico, Thailand, United Kingdom, England, Scotland, United States of America                                                                                                                                                                                                            | 01/2003 to 12/2007  | Gakidou E, Mallinger L, Abbott-Klafter J, Guerrero R, Villalpando S, Ridaura RL, Aekplakorn W, Naghavi M, Lim S, Lozano R, Murray CJ. Management of diabetes and associated cardiovascular risk factors in seven countries: a comparison of data from national health examination surveys. <i>Bull World Health Organ</i> . 2011; 89(3): 172-83. |
| Scientific literature | NA                                                                           | Subnational   | Iran (Islamic Republic of), TehrfĀn                                                                                                                                                                                                                                                                                            | 01/2006 to 12/2008  | Shab-Bidar S, Hosseini-Esfahani F, Mirmiran P, Hosseinpour-Niazi S, Azizi F. Metabolic syndrome profiles, obesity measures and intake of dietary fatty acids in adults: Tehran Lipid and Glucose Study. <i>J Hum Nutr Diet</i> . 2014; 27 Suppl 2: 98-108.                                                                                       |
| Scientific literature | NA                                                                           | Subnational   | Iran (Islamic Republic of), E~üfahfĀn                                                                                                                                                                                                                                                                                          | 01/2003 to 12/2005  | Janghorbani M, Amini M. Normal fasting plasma glucose and risk of prediabetes and type 2 diabetes: the Isfahan Diabetes Prevention Study. <i>Rev Diabet Stud</i> . 2011; 8(4): 490-8.                                                                                                                                                            |
| Scientific literature | NA                                                                           | Subnational   | Iran (Islamic Republic of), E~üfahfĀn                                                                                                                                                                                                                                                                                          | 01/2000 to 12/2003  | Janghorbani M, Rezvanian H, Kachooei A, Ghorbani A, Chitsaz A, Izadi F, Amini M. Peripheral neuropathy in type 2 diabetes mellitus in Isfahan, Iran: prevalence and risk factors. <i>Acta Neurol Scand</i> . 2006; 114(6): 384-91.                                                                                                               |
| Scientific literature | NA                                                                           | NA            | Iran (Islamic Republic of)                                                                                                                                                                                                                                                                                                     | 01/1997 to 12/2004  | Hosseinpanah F, Rambod M, Azizi F. Population attributable risk for diabetes associated with excess weight in Tehranian adults: a population-based cohort study. <i>BMC Public Health</i> . 2007; 7: 328.                                                                                                                                        |
| Scientific literature | NA                                                                           | Subnational   | Iran (Islamic Republic of), TehrfĀn                                                                                                                                                                                                                                                                                            | 01/1999 to 12/2001  | Harati H, Hadaegh F, Saadat N, Azizi F. Population-based incidence of Type 2 diabetes and its associated risk factors: results from a six-year cohort study in Iran. <i>BMC Public Health</i> . 2009; 186.                                                                                                                                       |
| Scientific literature | NA                                                                           | NA            | Iran (Islamic Republic of)                                                                                                                                                                                                                                                                                                     | 01/2008 to 12/2009  | Hasani N, Khosrawi S, Hashemipour M, Haghghatiyan M, Javdan Z, Taheri MH, Kelishadi R, Amini M, Barekatein R. Prevalence and related risk-factors of peripheral neuropathy in children with insulin-dependent diabetes mellitus. <i>J Res Med Sci</i> . 2013; 18(2): 132-6.                                                                      |
| Scientific literature | NA                                                                           | Subnational   | Iran (Islamic Republic of), Yazd                                                                                                                                                                                                                                                                                               | 01/2010 to 12/2011  | Dehghan MH, Katibeh M, Ahmadi H, Nourinia R, Yaseri M. Prevalence and risk factors for diabetic retinopathy in the 40 to 80 year-old population in Yazd, Iran: the Yazd Eye Study. <i>J Diabetes</i> . 2015; 7(1): 139-41.                                                                                                                       |
| Scientific literature | NA                                                                           | Subnational   | Iran (Islamic Republic of), E~üfahfĀn                                                                                                                                                                                                                                                                                          | 01/1993 to 12/1993  | Amini M, Afshin-Nia F, Bashardoost N, Aminorroaya A, Shahparian M, Kazemi M. Prevalence and risk factors of diabetes mellitus in the Isfahan city population (aged 40 or over) in 1993. <i>Diabetes Res Clin Pract</i> . 1997; 38(3): 185-90.                                                                                                    |
| Scientific literature | NA                                                                           | Country       | Algeria, Argentina, Bahrain, Bangladesh, China, Egypt, India, Indonesia, Iran (Islamic Republic of), Jordan, Kuwait, Libya, Malaysia, Mexico, Morocco, Pakistan, Philippines, Qatar, Russian Federation, Saudi Arabia, Singapore, Republic of Korea, Taiwan (Province of China), Tunisia, Turkiye, United Arab Emirates, Yemen | 01/2009 to 12/2010  | Litwak L, Goh SY, Hussein Z, Malek R, Prusty V, Khamseh ME. Prevalence of diabetes complications in people in type 2 diabetes mellitus and its association with baseline characteristics in the multinational A1chieve study. <i>Diabetol Metab Syndr</i> . 2013; 5(1): 57.                                                                      |
| Scientific literature | NA                                                                           | NA            | Iran (Islamic Republic of)                                                                                                                                                                                                                                                                                                     | 01/2005 to 12/2005  | Abdollahi A, Malekmadani MH, Mansoori MR, Bostak A, Abbaszadeh MR, Mirshahi A. Prevalence of diabetic retinopathy in patients with newly diagnosed type II diabetes mellitus. <i>Acta Med Iran</i> . 2006; 44(6): 415-19.                                                                                                                        |

| Data type             | Secondary data type                                                                                                   | Coverage type | Geography                                                         | Time period covered | Suggested citation                                                                                                                                                                                                                                                                                                                                     |
|-----------------------|-----------------------------------------------------------------------------------------------------------------------|---------------|-------------------------------------------------------------------|---------------------|--------------------------------------------------------------------------------------------------------------------------------------------------------------------------------------------------------------------------------------------------------------------------------------------------------------------------------------------------------|
| Scientific literature | NA                                                                                                                    | Subnational   | Iran (Islamic Republic of), TehrfĀn                               | 01/2007 to 12/2007  | Javadi MA, Katibeh M, Rafati N, Dehghan MH, Zayeri F, Yaseri M, Sehat M, Ahmadieh H. Prevalence of diabetic retinopathy in Tehran province: a population-based study. <i>BMC Ophthalmol.</i> 2009; 9(1): 12.                                                                                                                                           |
| Scientific literature | NA                                                                                                                    | Subnational   | Iran (Islamic Republic of), MfĀzandarĀn, Sf'stfĀn va Bal'chestfĀn | 01/2012 to 12/2013  | Ostovaneh MR, Zamani F, Sharafkhan M, Ansari-Moghaddam A, Akhavan Khaleghi N, Saeedian FS, Rohani Z, Motamed N, Maadi M, Malekzadeh R, Poustchi H. Prevalence of metabolic syndrome in Amol and Zahedan, Iran: a population based study. <i>Arch Iran Med.</i> 2014; 17(7): 477-482.                                                                   |
| Scientific literature | NA                                                                                                                    | NA            | Iran (Islamic Republic of)                                        | 01/2011 to 12/2011  | Noshad S, Abbasi M, Etemad K, Meysamie A, Afarideh M, Khajeh E, Asgari F, Mousavizadeh M, Rafei A, Neishaboury M, Ghajar A, Nakhjavani M, Koohpayehzadeh J, Esteghamati A. Prevalence of metabolic syndrome in Iran: A 2011 update. <i>J Diabetes.</i> 2017; 9(5): 518-525.                                                                            |
| Scientific literature | NA                                                                                                                    | NA            | Iran (Islamic Republic of)                                        | 01/2005 to 12/2007  | Azimi-Nezhad M, Ghayour-Mobarhan M, Parizadeh MR, Safarian M, Esmaeili H, Parizadeh SM, Khodae G, Hosseini J, Abasalti Z, Hassankhani B, Ferns G. Prevalence of type 2 diabetes mellitus in Iran and its relationship with gender, urbanisation, education, marital status and occupation. <i>Singapore Med J.</i> 2008; 49(7): 571-6.                 |
| Scientific literature | NA                                                                                                                    | NA            | Iran (Islamic Republic of)                                        | 01/2009 to 12/2009  | Rajavi Z, Katibeh M, Ziaei H, Fardesmaeilpour N, Sehat M, Ahmadieh H, Javadi MA. Rapid assessment of avoidable blindness in Iran. <i>Ophthalmology.</i> 2011; 118(9): 1812-8.                                                                                                                                                                          |
| Scientific literature | NA                                                                                                                    | NA            | Iran (Islamic Republic of)                                        | 01/1999 to 12/2009  | Fahimfar N, Khalili D, Mohebi R, Azizi F, Hadaegh F. Risk factors for ischemic stroke; results from 9 years of follow-up in a population based cohort of Iran. <i>BMC Neurol.</i> 2012; 12: 117.                                                                                                                                                       |
| Scientific literature | NA                                                                                                                    | NA            | Iran (Islamic Republic of)                                        | 01/2010 to 12/2010  | Vatankhah N, Noudeh YJ, Khamseh ME, Baradaran HR. Screening people with type 2 diabetes at risk for foot ulceration in Iran. <i>Diabetes Technol Ther.</i> 2010; 12(9): 731-6.                                                                                                                                                                         |
| Scientific literature | NA                                                                                                                    | Subnational   | Iran (Islamic Republic of), TehrfĀn                               | 01/2002 to 12/2011  | Kheirandish M, Asgari S, Lotfaliany M, Bozorgmanesh M, Saadat N, Tohidi M, Azizi F, Hadaegh F. Secular trends in serum lipid levels of a Middle Eastern adult population; 10 years follow up in Tehran lipid and glucose study. <i>Lipids Health Dis.</i> 2014; 13: 20.                                                                                |
| Scientific literature | NA                                                                                                                    | Subnational   | Iran (Islamic Republic of), TehrfĀn                               | 01/1999 to 12/2011  | Derakhshan A, Sardarinia M, Khalili D, Momenan AA, Azizi F, Hadaegh F. Sex specific incidence rates of type 2 diabetes and its risk factors over 9 years of follow-up: Tehran Lipid and Glucose Study. <i>PLoS One.</i> 2014; 9(7): e102563.                                                                                                           |
| Scientific literature | NA                                                                                                                    | Subnational   | Iran (Islamic Republic of), TehrfĀn                               | 01/1998 to 12/2008  | Hadaegh F, Shafiee G, Hatami M, Azizi F. Systolic and diastolic blood pressure, mean arterial pressure and pulse pressure for prediction of cardiovascular events and mortality in a Middle Eastern population. <i>Blood Press.</i> 2012; 21(1): 12-18.                                                                                                |
| Scientific literature | NA                                                                                                                    | NA            | Iran (Islamic Republic of)                                        | 01/2007 to 12/2007  | Shirani S, Heidari K, Sabzghabae AM, Mirmoghataee P, Hoseini L, Aalifar H, Fadaei H, Esnaashari H, Soltani R. The modifiable noncommunicable risk factors among an Iranian population. <i>Southeast Asian J Trop Med Public Health.</i> 2012; 43(5): 1227-32.                                                                                          |
| Scientific literature | NA                                                                                                                    | NA            | Iran (Islamic Republic of)                                        | 01/2014 to 12/2017  | Mansour-Ghanaei F, Joukar F, Naghipour MR, Sepanlou SG, Poustchi H, Mojtahedi K, Balou HA, Heidarzadeh A, Malekzadeh R. The PERSIAN Guilan Cohort Study (PGCS). <i>Arch Iran Med.</i> 2019; 22(1): 39-45.                                                                                                                                              |
| Scientific literature | NA                                                                                                                    | Subnational   | Iran (Islamic Republic of), HamadfĀn                              | 01/2011 to 12/2011  | Kiani J, Moghimbeigi A, Azizkhani H, Kosarifar S. The prevalence and associated risk factors of peripheral diabetic neuropathy in Hamedan, Iran. <i>Arch Iran Med.</i> 2013; 16(1): 17-19.                                                                                                                                                             |
| Scientific literature | NA                                                                                                                    | Subnational   | Iran (Islamic Republic of), E'ufahfĀn                             | 01/1980 to 12/1995  | Sarraf-Zadegan N, Sayed-Tabatabaei FA, Bashardoost N, Maleki A, Totonchi M, Habibi HR, Sotodehmaram E, Tafazoli F, Karimi A. The prevalence of coronary artery disease in an urban population in Isfahan, Iran. <i>Acta Cardiol.</i> 1999; 54(5): 257-63.                                                                                              |
| Scientific literature | NA                                                                                                                    | Subnational   | Iran (Islamic Republic of), KhorfĀsfĀn-e Jon'bf'                  | 01/2012 to 12/2012  | Chahkandi T, Taheri F, Kazemi T, Bijari B. The Prevalence of Diabetes and Prediabetes Among Elementary School Children in Birjand. <i>Iran J Pediatr.</i> 2015; 25(1): e183.                                                                                                                                                                           |
| Scientific literature | NA                                                                                                                    | NA            | Iran (Islamic Republic of)                                        | 01/2004 to 12/2004  | Tabatabaei-Malazy O, Mohajeri-Tehrani M, Madani S, Heshmat R, Larijani B. The prevalence of diabetic peripheral neuropathy and related factors. <i>Iran J Public Health.</i> 2011; 40(3): 55-62.                                                                                                                                                       |
| Scientific literature | NA                                                                                                                    | NA            | Iran (Islamic Republic of)                                        | 01/2004 to 12/2013  | Golozar A, Khalili D, Etemadi A, Poustchi H, Fazeltabar A, Hosseini F, Kamangar F, Khoshnia M, Islami F, Hadaegh F, Brennan P, Boffetta P, Abnet CC, Dawsey SM, Azizi F, Malekzadeh R, Danaei G. White rice intake and incidence of type-2 diabetes: analysis of two prospective cohort studies from Iran. <i>BMC Public Health.</i> 2017; 17(1): 133. |
| Scientific literature | NA                                                                                                                    | NA            | Iraq                                                              | 01/2012 to 12/2016  | Almahfoodh D, Alabbood M, Alali A, Mansour A. Epidemiology of type 1 diabetes mellitus in Basrah, Southern Iraq: A retrospective study. <i>Diabetes Res Clin Pract.</i> 2017; 133: 104-108.                                                                                                                                                            |
| Survey                | Household                                                                                                             | Subnational   | Iraq, Dah'k                                                       | 12/2003 to 01/2004  | Directorate General of Health-Duhok (Iraq), Kurdistan Regional Government (Iraq), Ministry of Health (Iraq), World Health Organization (WHO). Iraq - Dah'k STEPS Noncommunicable Disease Risk Factors Survey 2003-2004.                                                                                                                                |
| Survey                | Household, Nationally representative, Urban-rural representative                                                      | Country       | Iraq                                                              | 08/2006 to 03/2007  | Ministry of Health (Iraq), Central Organization for Statistics and Information Technology (Iraq), Kurdistan Regional Statistics Office, World Health Organization (WHO), Ministry of Health (Kurdistan). Iraq Family Health Survey 2006-2007.                                                                                                          |
| Survey                | Household, Individual, Interview, Nationally representative, Subnationally representative, Urban-rural representative | Country       | Iraq                                                              | 11/2006 to 11/2007  | Central Organization for Statistics and Information Technology (Iraq), Kurdistan Regional Statistics Office, World Bank. Iraq Household Socioeconomic Survey 2006-2007. Washington DC, United States of America: World Bank.                                                                                                                           |
| Survey                | Household, Individual, Interview, Nationally representative, Subnationally representative, Urban-rural representative | Country       | Iraq                                                              | 02/2012 to 01/2013  | OAMDI, 2016. Harmonized Household Income and Expenditure Surveys (HHIES), <a href="http://erf.org.eg/data-portal/">http://erf.org.eg/data-portal/</a> . Version 2.0 of Licensed Data Files; IHSES 2012- Central Organization for Statistics (COS). Egypt: Economic Research Forum (ERF).-†                                                             |

| Data type             | Secondary data type                                                                                                                                           | Coverage type | Geography                                                                                                                                                                                                                                                                                                                      | Time period covered | Suggested citation                                                                                                                                                                                                                                                           |
|-----------------------|---------------------------------------------------------------------------------------------------------------------------------------------------------------|---------------|--------------------------------------------------------------------------------------------------------------------------------------------------------------------------------------------------------------------------------------------------------------------------------------------------------------------------------|---------------------|------------------------------------------------------------------------------------------------------------------------------------------------------------------------------------------------------------------------------------------------------------------------------|
| Survey                | Household                                                                                                                                                     | Country       | Iraq                                                                                                                                                                                                                                                                                                                           | 01/2006 to 02/2006  | Central Organization for Statistics and Information Technology (Iraq), Ministry of Health (Iraq), World Health Organization (WHO). Iraq STEPS Noncommunicable Disease Risk Factors Survey 2006.                                                                              |
| Survey                | Cross-sectional, Household, Individual, Interview, Nationally representative                                                                                  | Country       | Iraq                                                                                                                                                                                                                                                                                                                           | 08/2015 to 12/2015  | Ministry of Health (Iraq), Ministry of Planning (Iraq), World Health Organization (WHO). Iraq STEPS Noncommunicable Disease Risk Factors Survey 2015.                                                                                                                        |
| Scientific literature | NA                                                                                                                                                            | NA            | Iraq                                                                                                                                                                                                                                                                                                                           | 01/2011 to 12/2012  | Mansour AA, Al-Maliky AA, Kasem B, Jabar A, Mosbeh KA. Prevalence of diagnosed and undiagnosed diabetes mellitus in adults aged 19 years and older in Basrah, Iraq. <i>Diabetes Metab Syndr</i> . 2014; 139,Äì44.                                                            |
| Scientific literature | NA                                                                                                                                                            | NA            | Jordan                                                                                                                                                                                                                                                                                                                         | 01/1997 to 12/1997  | Ajlouni K, Jaddou H, Batieha A. Diabetes and impaired glucose tolerance in Jordan: prevalence and associated risk factors. <i>J Intern Med</i> . 1998; 244(4): 317-23.                                                                                                       |
| Scientific literature | NA                                                                                                                                                            | NA            | Jordan                                                                                                                                                                                                                                                                                                                         | 01/2009 to 12/2011  | Jammal H, Khader Y, Alkhatib S, Abujbara M, Alomari M, Ajlouni K. Diabetic retinopathy in patients with newly diagnosed type 2 diabetes mellitus in Jordan: prevalence and associated factors. <i>J Diabetes</i> . 2013; 5(2): 172-9.                                        |
| Scientific literature | NA                                                                                                                                                            | NA            | Jordan                                                                                                                                                                                                                                                                                                                         | 01/1992 to 12/1996  | Ajlouni K, Qusous Y, Khawaldeh AK, Jaddou H, Batieha A, Ammari F, Zaheri M, Mashal A. Incidence of insulin-dependent diabetes mellitus in Jordanian children aged 0-14 y during 1992-1996. <i>Acta Paediatr Suppl</i> . 1999; 88(427): 11-3.                                 |
| Survey                | Cross-sectional, GPS coordinates (GIS), Household, Individual, Interview, Nationally representative, Subnationally representative, Urban-rural representative | Country       | Jordan                                                                                                                                                                                                                                                                                                                         | 10/2017 to 01/2018  | Department of Statistics (Jordan), ICF International. Jordan Demographic and Health Survey 2017-2018. Fairfax, United States of America: ICF International, 2019.                                                                                                            |
| Survey                | Household                                                                                                                                                     | Country       | Jordan                                                                                                                                                                                                                                                                                                                         | 01/2004 to 12/2004  | Ministry of Health (Jordan), World Health Organization (WHO). Jordan STEPS Noncommunicable Disease Risk Factors Survey 2004.                                                                                                                                                 |
| Survey                | Household, Individual, Interview, Nationally representative                                                                                                   | Country       | Jordan                                                                                                                                                                                                                                                                                                                         | 01/2007 to 12/2007  | Centers for Disease Control and Prevention (CDC), Ministry of Health (Jordan), World Health Organization (WHO). Jordan STEPS Noncommunicable Disease Risk Factors Survey 2007.                                                                                               |
| Scientific literature | NA                                                                                                                                                            | NA            | Jordan                                                                                                                                                                                                                                                                                                                         | 01/1996 to 12/1996  | Ajlouni K, Jaddou H, Batieha A. Obesity in Jordan. <i>Int J Obes Relat Metab Disord</i> . 1998; 22(7): 624-8.                                                                                                                                                                |
| Scientific literature | NA                                                                                                                                                            | NA            | Jordan                                                                                                                                                                                                                                                                                                                         | 01/1994 to 12/2004  | Khader Y, Batieha A, Ajlouni H, El-Khateeb M, Ajlouni K. Obesity in Jordan: prevalence, associated factors, comorbidities, and change in prevalence over ten years. <i>Metab Syndr Relat Disord</i> . 2008; 6(2): 113-20.                                                    |
| Scientific literature | NA                                                                                                                                                            | NA            | Jordan                                                                                                                                                                                                                                                                                                                         | 01/2001 to 12/2001  | Jbour AS, Jarrah NS, Radaideh AM, Shegem NS, Bader IM, Batieha AM, Ajlouni KM. Prevalence and predictors of diabetic foot syndrome in type 2 diabetes mellitus in Jordan. <i>Saudi Med J</i> . 2003; 24(7): 761-4.                                                           |
| Scientific literature | NA                                                                                                                                                            | NA            | Jordan                                                                                                                                                                                                                                                                                                                         | 01/2012 to 12/2012  | Rabiu MM, Al Bdour MD, Abu Ameerh MA, Jadoon MZ. Prevalence of blindness and diabetic retinopathy in northern Jordan. <i>Eur J Ophthalmol</i> . 2015; 25(4): 320-7.                                                                                                          |
| Scientific literature | NA                                                                                                                                                            | Country       | Algeria, Argentina, Bahrain, Bangladesh, China, Egypt, India, Indonesia, Iran (Islamic Republic of), Jordan, Kuwait, Libya, Malaysia, Mexico, Morocco, Pakistan, Philippines, Qatar, Russian Federation, Saudi Arabia, Singapore, Republic of Korea, Taiwan (Province of China), Tunisia, Turkiye, United Arab Emirates, Yemen | 01/2009 to 12/2010  | Litwak L, Goh SY, Hussein Z, Malek R, Prusty V, Khamseh ME. Prevalence of diabetes complications in people in type 2 diabetes mellitus and its association with baseline characteristics in the multinational A1chieve study . <i>Diabetol Metab Syndr</i> . 2013; 5(1): 57. |
| Scientific literature | NA                                                                                                                                                            | NA            | Egypt, Jordan, Kuwait, Lebanon                                                                                                                                                                                                                                                                                                 | 01/2009 to 12/2009  | Jambart S, Ammache Z, Haddad F, Younes A, Hassoun A, Abdalla K, Selwan CA, Sunna N, Wajsbrot D, Youseif E. Prevalence of painful diabetic peripheral neuropathy among patients with diabetes mellitus in the Middle East region. <i>J Int Med Res</i> . 2011; 39(2): 366-77. |
| Scientific literature | NA                                                                                                                                                            | NA            | Jordan                                                                                                                                                                                                                                                                                                                         | 01/2009 to 12/2009  | Khader YS, Batieha A, Jaddou H, Batieha Z, El-Khateeb M, Ajlouni K. Relationship between 25-hydroxyvitamin D and metabolic syndrome among Jordanian adults. <i>Nutr Res Pract</i> . 2011; 5(2): 132-9.                                                                       |
| Scientific literature | NA                                                                                                                                                            | NA            | Jordan                                                                                                                                                                                                                                                                                                                         | 01/2015 to 12/2017  | Abujbara M, Batieha A, Khader Y, Jaddou H, El-Khateeb M, Ajlouni K. The Prevalence of Dyslipidemia among Jordanians. <i>J Lipids</i> . 2018; 2018.                                                                                                                           |
| Scientific literature | NA                                                                                                                                                            | NA            | Jordan                                                                                                                                                                                                                                                                                                                         | 01/1994 to 12/2017  | Ajlouni K, Batieha A, Jaddou H, Khader Y, Abdo N, El-Khateeb M, Hyassat D, Al-Louzi D. Time trends in diabetes mellitus in Jordan between 1994 and 2017. <i>Diabet Med</i> . 2019; 36(9): 1176-82.                                                                           |
| Scientific literature | NA                                                                                                                                                            | NA            | Kuwait                                                                                                                                                                                                                                                                                                                         | 01/2012 to 12/2013  | Awad AI, Alsaleh FM. 10-year risk estimation for type 2 diabetes mellitus and coronary heart disease in Kuwait: a cross-sectional population-based study. <i>PLoS One</i> . 2015; 10(1): e0116742.                                                                           |
| Scientific literature | NA                                                                                                                                                            | NA            | Kuwait                                                                                                                                                                                                                                                                                                                         | 01/2010 to 12/2012  | Alarouj M, Bennakhi A, Alnesef Y, Sharifi M, Elkum N. Diabetes and associated cardiovascular risk factors in the State of Kuwait: the first national survey. <i>Int J Clin Pract</i> . 2013; 67(1): 89-96.                                                                   |

| Data type             | Secondary data type                                                                                        | Coverage type | Geography                                                                                                                                                                                                                                                                                                                                                                                                                                                                                                                                                        | Time period covered | Suggested citation                                                                                                                                                                                                                                                                                                                                                      |
|-----------------------|------------------------------------------------------------------------------------------------------------|---------------|------------------------------------------------------------------------------------------------------------------------------------------------------------------------------------------------------------------------------------------------------------------------------------------------------------------------------------------------------------------------------------------------------------------------------------------------------------------------------------------------------------------------------------------------------------------|---------------------|-------------------------------------------------------------------------------------------------------------------------------------------------------------------------------------------------------------------------------------------------------------------------------------------------------------------------------------------------------------------------|
| Scientific literature | NA                                                                                                         | NA            | Kuwait                                                                                                                                                                                                                                                                                                                                                                                                                                                                                                                                                           | 01/1980 to 12/1981  | Taha TH, Moussa MA, Rashid AR, Fenech FF. Diabetes mellitus in Kuwait. Incidence in the first 29 years of life. Diabetologia. 1983; 25(4): 306-8.                                                                                                                                                                                                                       |
| Scientific literature | NA                                                                                                         | NA            | Kuwait                                                                                                                                                                                                                                                                                                                                                                                                                                                                                                                                                           | 01/1992 to 12/1997  | Shaltout AA, Moussa MAA, Qabazard M, Abdella N, Karvonen M, Al-Khawari M, Al-Arouj M, Al-Nakhi A, Tuomilehto J, El-Gammal A, Kuwait Diabetes Study Group. Further evidence for the rising incidence of childhood Type 1 diabetes in Kuwait. Diabet Med. 2002; 19(6): 522-5.                                                                                             |
| Scientific literature | NA                                                                                                         | NA            | Kuwait                                                                                                                                                                                                                                                                                                                                                                                                                                                                                                                                                           | 01/1992 to 12/1993  | Shaltout AA, Qabazard MA, Abdella NA, LaPorte RE, al Arouj M, Ben Nekhi A, Moussa MA, al Khawari MA. High incidence of childhood-onset IDDM in Kuwait. Kuwait Study Group of Diabetes in Childhood. Diabetes Care. 1995; 18(7): 923-7.                                                                                                                                  |
| Scientific literature | NA                                                                                                         | NA            | Kuwait                                                                                                                                                                                                                                                                                                                                                                                                                                                                                                                                                           | 01/2008 to 12/2008  | Al Zenki S, Al Omirah H, Al Hooti S, Al Hamad N, Jackson RT, Rao A, Al Jahmah N, Al Obaid I, Al Ghanim J, Al Somaie M, Zaghloul S, Al Othman A. High prevalence of metabolic syndrome among Kuwaiti adults--a wake-up call for public health intervention. Int J Environ Res Public Health. 2012; 9(5): 1984-96.                                                        |
| Scientific literature | NA                                                                                                         | NA            | Kuwait                                                                                                                                                                                                                                                                                                                                                                                                                                                                                                                                                           | 01/1995 to 12/1999  | Abdul-Rasoul M, Al-Qattan H, Al-Haj A, Habib H, Ismael A. Incidence and seasonal variation of Type 1 diabetes in children in Farwania area, Kuwait (1995-1999). Diabetes Res Clin Pract. 2002; 56(2): 153-7.                                                                                                                                                            |
| Scientific literature | NA                                                                                                         | NA            | Algeria, Argentina, Australia, Austria, Barbados, Belgium, Brazil, Bulgaria, Canada, Chile, China, Colombia, Cuba, Denmark, Dominica, Estonia, Finland, France, Germany, Greece, Hungary, Israel, Italy, Japan, Kuwait, Latvia, Lithuania, Luxembourg, Mauritius, Mexico, Netherlands, New Zealand, Norway, Pakistan, Paraguay, Peru, Poland, Portugal, Romania, Russian Federation, Slovakia, Slovenia, Spain, Sudan, Tunisia, United Kingdom, United States of America, Puerto Rico, United States Virgin Islands, Uruguay, Venezuela (Bolivarian Republic of) | 01/2000 to 12/2000  | Karvonen M, Viik-Kajander M, Moltchanova E, Libman I, LaPorte R, Tuomilehto J. Incidence of childhood type 1 diabetes worldwide. Diabetes Mondiale (DiaMond) Project Group. Diabetes Care. 2000; 23(10): 1516-26.                                                                                                                                                       |
| Scientific literature | NA                                                                                                         | NA            | Kuwait                                                                                                                                                                                                                                                                                                                                                                                                                                                                                                                                                           | 01/1992 to 12/2013  | Shaltout AA, Wake D, Thanaraj TA, Omar DM, Al-AbdulRazzaq D, Channanath A, AlKandari H, Abduroul M, Miller S, Conway N, Tuomilehto J, Davidsson L, on behalf of the Steering Group for the Study of Childhood Diabetes in Kuwait. Incidence of type 1 diabetes has doubled in Kuwaiti children 0-14 years over the last 20 years. Pediatr Diabetes. 2017; 18(8): 761-6. |
| Report                | Discharge, Financial, Inpatient, National vital registration, Outpatient                                   | Country       | Kuwait                                                                                                                                                                                                                                                                                                                                                                                                                                                                                                                                                           | 01/1957 to 12/2012  | Central Statistical Bureau (Kuwait). Kuwait Annual Statistical Abstract 2012. Kuwait City, Kuwait: Central Statistical Bureau (Kuwait), 2013.                                                                                                                                                                                                                           |
| Report                | Discharge, Epi surveillance, Financial, Inpatient, National vital registration, Outpatient                 | Country       | Kuwait                                                                                                                                                                                                                                                                                                                                                                                                                                                                                                                                                           | 01/1957 to 12/2013  | Central Statistical Bureau (Kuwait). Kuwait Annual Statistical Abstract 2013. Kuwait City, Kuwait: Central Statistical Bureau (Kuwait), 2014.                                                                                                                                                                                                                           |
| Survey                | Cross-sectional, Household, Individual, Interview, Nationally representative                               | Country       | Kuwait                                                                                                                                                                                                                                                                                                                                                                                                                                                                                                                                                           | 11/1996 to 12/1996  | Health Ministers, Council for GCC States, Ministry of Health (Kuwait), United Nations Statistics Division (UNSD). Kuwait Family Health Survey 1996.                                                                                                                                                                                                                     |
| Report                | NA                                                                                                         | Country       | Kuwait                                                                                                                                                                                                                                                                                                                                                                                                                                                                                                                                                           | 01/2003 to 12/2012  | Ministry of Health (Kuwait). Kuwait Health Indicators 2003-2012. Kuwait City, Kuwait: Ministry of Health (Kuwait), 2014.                                                                                                                                                                                                                                                |
| Survey                | Household                                                                                                  | Country       | Kuwait                                                                                                                                                                                                                                                                                                                                                                                                                                                                                                                                                           | 01/2006 to 12/2006  | Ministry of Health (Kuwait), World Health Organization (WHO). Kuwait STEPS Noncommunicable Disease Risk Factors Survey 2006.                                                                                                                                                                                                                                            |
| Survey                | Cross-sectional, Individual, Interview, Nationally representative                                          | Country       | Kuwait                                                                                                                                                                                                                                                                                                                                                                                                                                                                                                                                                           | 03/2014 to 09/2014  | Ministry of Health (Kuwait), World Health Organization (WHO). Kuwait STEPS Noncommunicable Disease Risk Factors Survey 2014.                                                                                                                                                                                                                                            |
| Survey                | Cross-sectional, Household, Individual, Interview, Nationally representative, Subnationally representative | Country       | Kuwait                                                                                                                                                                                                                                                                                                                                                                                                                                                                                                                                                           | 01/2008 to 12/2010  | Health Ministers, Council for GCC States, Ministry of Health (Kuwait), World Health Organization (WHO). Kuwait World Health Survey 2008-2010.                                                                                                                                                                                                                           |
| Scientific literature | NA                                                                                                         | NA            | Kuwait                                                                                                                                                                                                                                                                                                                                                                                                                                                                                                                                                           | 01/1996 to 12/1996  | Abdella N, Al Arouj M, Al Nakhi A, Al Assoussi A, Moussa M. Non-insulin-dependent diabetes in Kuwait: prevalence rates and associated risk factors. Diabetes Res Clin Pract. 1998; 42(3): 187-96.                                                                                                                                                                       |



| Data type             | Secondary data type                               | Coverage type | Geography                                                                                                                                                                                                                                                                                                                      | Time period covered | Suggested citation                                                                                                                                                                                                                                                   |
|-----------------------|---------------------------------------------------|---------------|--------------------------------------------------------------------------------------------------------------------------------------------------------------------------------------------------------------------------------------------------------------------------------------------------------------------------------|---------------------|----------------------------------------------------------------------------------------------------------------------------------------------------------------------------------------------------------------------------------------------------------------------|
| Scientific literature | NA                                                | Country       | Algeria, Argentina, Bahrain, Bangladesh, China, Egypt, India, Indonesia, Iran (Islamic Republic of), Jordan, Kuwait, Libya, Malaysia, Mexico, Morocco, Pakistan, Philippines, Qatar, Russian Federation, Saudi Arabia, Singapore, Republic of Korea, Taiwan (Province of China), Tunisia, Turkiye, United Arab Emirates, Yemen | 01/2009 to 12/2010  | Litwak L, Goh SY, Hussein Z, Malek R, Prusty V, Khamseh ME. Prevalence of diabetes complications in people in type 2 diabetes mellitus and its association with baseline characteristics in the multinational A1chieve study . Diabetol Metab Syndr. 2013; 5(1): 57. |
| Scientific literature | NA                                                | NA            | Egypt, Jordan, Kuwait, Lebanon                                                                                                                                                                                                                                                                                                 | 01/2009 to 12/2009  | Jambart S, Ammache Z, Haddad F, Younes A, Hassoun A, Abdalla K, Selwan CA, Sunna N, Wajsbrot D, Youseif E. Prevalence of painful diabetic peripheral neuropathy among patients with diabetes mellitus in the Middle East region. J Int Med Res. 2011; 39(2): 366-77. |
| Scientific literature | NA                                                | NA            | Kuwait                                                                                                                                                                                                                                                                                                                         | 01/2002 to 12/2002  | Moussa MA, Alsaeid M, Abdella N, Refai TM, Al-Sheikh N, Gomez JE. Prevalence of type 1 diabetes among 6- to 18-year-old Kuwaiti children. Med Princ Pract. 2005; 14(2): 87-91.                                                                                       |
| Scientific literature | NA                                                | NA            | Kuwait                                                                                                                                                                                                                                                                                                                         | 01/2002 to 12/2004  | Al-Zuabi H, Al-Tammar Y, Al-Moataz R, Al-Sabti K, Wani VB, Hamama F, Mohammad H, Al-Suwayan MH. Retinopathy in newly diagnosed type 2 diabetes mellitus. Med Princ Pract. 2005; 14(5): 293-6.                                                                        |
| Scientific literature | NA                                                | NA            | Kuwait                                                                                                                                                                                                                                                                                                                         | 01/2000 to 12/2005  | Al-Adsani AM. Risk factors for diabetic retinopathy in Kuwaiti type 2 diabetic patients. Saudi Med J. 2007; 28(4): 579-83.                                                                                                                                           |
| Scientific literature | NA                                                | NA            | Kuwait                                                                                                                                                                                                                                                                                                                         | 01/2002 to 12/2009  | Ahmed F, Waslien C, Al-Sumaie MA, Prakash P, Allafi A. Trends and risk factors of hyperglycemia and diabetes among Kuwaiti adults: National Nutrition Surveillance Data from 2002 to 2009. BMC Public Health. 2013; 103.                                             |
| Scientific literature | NA                                                | NA            | Libya                                                                                                                                                                                                                                                                                                                          | 01/2008 to 12/2008  | Elhwuegi AS, Darez AA, Langa AM, Bashaga NA. Cross-sectional pilot study about the health status of diabetic patients in city of Misurata, Libya. Afr Health Sci. 2012; 12(1): 81-6.                                                                                 |
| Scientific literature | NA                                                | NA            | Libya                                                                                                                                                                                                                                                                                                                          | 01/1981 to 12/1990  | Kadiki OA, Roaed RB. Epidemiological and clinical patterns of diabetes mellitus in Benghazi, Libyan Arab Jamahiriya. East Mediterr Health J. 1999; 5(1): 6-13.                                                                                                       |
| Scientific literature | NA                                                | NA            | Libya                                                                                                                                                                                                                                                                                                                          | 01/1981 to 12/1990  | Kadiki OA, Moawad SE. Incidence and prevalence of type 1 diabetes in children and adolescents in Benghazi, Libya. Diabet Med. 1993; 10(9): 866-9.                                                                                                                    |
| Scientific literature | NA                                                | NA            | Libya                                                                                                                                                                                                                                                                                                                          | 01/1981 to 12/1990  | Kadiki OA, Reddy MR, Marzouk AA. Incidence of insulin-dependent diabetes (IDDM) and non-insulin-dependent diabetes (NIDDM) (0-34 years at onset) in Benghazi, Libya. Diabetes Res Clin Pract. 1996; 32(3): 165-73.                                                   |
| Scientific literature | NA                                                | NA            | Libya                                                                                                                                                                                                                                                                                                                          | 01/1991 to 12/1995  | Kadiki OA, Roaeid RB, Bhairi AM, Elamari IM. Incidence of insulin-dependent diabetes mellitus in Benghazi, Libya (1991-1995). Diabetes Metab. 1998; 24(5): 424-7.                                                                                                    |
| Scientific literature | NA                                                | NA            | Libya                                                                                                                                                                                                                                                                                                                          | 01/1991 to 12/2000  | Kadiki OA, Roaeid RB. Incidence of type 1 diabetes in children (0-14 years) in Benghazi Libya (1991-2000). Diabetes Metab. 2002; 28(6 Pt 1): 463-7.                                                                                                                  |
| Survey                | Health facility, Household, Individual, Interview | Country       | Libya                                                                                                                                                                                                                                                                                                                          | 05/2007 to 10/2007  | League of Arab States, National Center for Disease Control (Libya), Pan Arab Project for Family Health (PAPFAM). Libya Family Health Survey 2007.                                                                                                                    |
| Survey                | Household, Interview                              | Country       | Libya                                                                                                                                                                                                                                                                                                                          | 02/2009 to 11/2009  | Secretariat of Health and Environment (Libya), World Health Organization (WHO). Libya STEPS Noncommunicable Disease Risk Factors Survey 2009.                                                                                                                        |
| Scientific literature | NA                                                | NA            | Libya                                                                                                                                                                                                                                                                                                                          | 01/2010 to 12/2010  | Rabiu MM, Jenf M, Fituri S, Choudhury A, Agbabiaka I, Mousa A. Prevalence and causes of visual impairment and blindness, cataract surgical coverage and outcomes of cataract surgery in Libya. Ophthalmic Epidemiol. 2013; 20(1): 26-32.                             |
| Scientific literature | NA                                                | Country       | Algeria, Argentina, Bahrain, Bangladesh, China, Egypt, India, Indonesia, Iran (Islamic Republic of), Jordan, Kuwait, Libya, Malaysia, Mexico, Morocco, Pakistan, Philippines, Qatar, Russian Federation, Saudi Arabia, Singapore, Republic of Korea, Taiwan (Province of China), Tunisia, Turkiye, United Arab Emirates, Yemen | 01/2009 to 12/2010  | Litwak L, Goh SY, Hussein Z, Malek R, Prusty V, Khamseh ME. Prevalence of diabetes complications in people in type 2 diabetes mellitus and its association with baseline characteristics in the multinational A1chieve study . Diabetol Metab Syndr. 2013; 5(1): 57. |
| Scientific literature | NA                                                | NA            | Libya                                                                                                                                                                                                                                                                                                                          | 01/1998 to 12/1999  | Kadiki OA, Roaeid RB. Prevalence of diabetes mellitus and impaired glucose tolerance in Benghazi Libya. Diabetes Metab. 2001; 27(6): 647-54.                                                                                                                         |

| Data type             | Secondary data type                                                                                                 | Coverage type | Geography | Time period covered | Suggested citation                                                                                                                                                                                                                                              |
|-----------------------|---------------------------------------------------------------------------------------------------------------------|---------------|-----------|---------------------|-----------------------------------------------------------------------------------------------------------------------------------------------------------------------------------------------------------------------------------------------------------------|
| Scientific literature | NA                                                                                                                  | NA            | Libya     | 01/1981 to 12/1990  | Kadiki OA, Moawad SE. Ten-year incidence (1981-90) of insulin-dependent diabetes in the 0-29-year-old age group in Benghazi, Libya. <i>Diabetes Res Clin Pract.</i> 1994; 26(3): 223-8.                                                                         |
| Survey                | GPS coordinates (GIS), Household, Individual, Interview, Nationally representative                                  | Country       | Morocco   | 10/2003 to 02/2004  | League of Arab States, Macro International, Inc, Ministry of Health (Morocco). Morocco Demographic and Health Survey 2003-2004. Fairfax, United States of America: ICF International.                                                                           |
| Report                | NA                                                                                                                  | Country       | Morocco   | 01/1994 to 12/2003  | Ministry of Health (Morocco). Morocco Health in Figures 2004.                                                                                                                                                                                                   |
| Report                | NA                                                                                                                  | Country       | Morocco   | 01/1995 to 12/2004  | Ministry of Health (Morocco). Morocco Health in Figures 2005.                                                                                                                                                                                                   |
| Report                | Subnationally representative                                                                                        | Country       | Morocco   | 01/1995 to 12/2005  | Ministry of Health (Morocco). Morocco Health in Figures 2006.                                                                                                                                                                                                   |
| Report                | Subnationally representative                                                                                        | Country       | Morocco   | 01/1996 to 06/2007  | Ministry of Health (Morocco). Morocco Health in Figures 2006 Edition 2007.                                                                                                                                                                                      |
| Report                | Subnationally representative                                                                                        | Country       | Morocco   | 01/1996 to 12/2007  | Ministry of Health (Morocco). Morocco Health in Figures 2007 Edition 2008.                                                                                                                                                                                      |
| Report                | Subnationally representative                                                                                        | Country       | Morocco   | 01/1997 to 06/2009  | Ministry of Health (Morocco). Morocco Health in Figures 2008.                                                                                                                                                                                                   |
| Report                | Subnationally representative                                                                                        | Country       | Morocco   | 01/2000 to 12/2009  | Ministry of Health (Morocco). Morocco Health in Figures 2009.                                                                                                                                                                                                   |
| Report                | Subnationally representative                                                                                        | Country       | Morocco   | 01/2001 to 12/2011  | Ministry of Health (Morocco). Morocco Health in Figures 2010.                                                                                                                                                                                                   |
| Report                | Subnationally representative                                                                                        | Country       | Morocco   | 01/2002 to 12/2011  | Ministry of Health (Morocco). Morocco Health in Figures 2011.                                                                                                                                                                                                   |
| Report                | Subnationally representative                                                                                        | Country       | Morocco   | 01/2004 to 12/2013  | Ministry of Health (Morocco). Morocco Health in Figures 2012. Rabat, Morocco: Ministry of Health (Morocco).                                                                                                                                                     |
| Report                | Epi surveillance, Subnationally representative, Urban-rural representative                                          | Country       | Morocco   | 01/1998 to 12/2014  | Ministry of Health (Morocco). Morocco Health in Figures 2014. Rabat, Morocco: Ministry of Health (Morocco).                                                                                                                                                     |
| Report                | Subnationally representative, Urban-rural representative, Epi surveillance, Nationally representative               | Country       | Morocco   | 01/2004 to 12/2015  | Ministry of Health (Morocco). Morocco Health in Figures 2015. Rabat, Morocco: Ministry of Health (Morocco), 2016.                                                                                                                                               |
| Report                | Epi surveillance, Nationally representative, Subnationally representative, Urban-rural representative               | Country       | Morocco   | 01/1998 to 12/2016  | Ministry of Health (Morocco). Morocco Health in Figures 2016. Rabat, Morocco: Ministry of Health (Morocco).                                                                                                                                                     |
| Report                | Epi surveillance, Nationally representative, Subnationally representative, Urban-rural representative               | Country       | Morocco   | 01/2010 to 12/2017  | Ministry of Health (Morocco). Morocco Health in Figures 2017. Rabat, Morocco: Ministry of Health (Morocco).                                                                                                                                                     |
| Survey                | Cross-sectional, Household, Individual, Nationally representative, Urban-rural representative                       | Country       | Morocco   | 11/2010 to 03/2011  | Ministry of Health (Morocco), Pan Arab Project for Family Health (PAPFAM), United Nations Children's Fund (UNICEF), United Nations Population Fund (UNFPA), World Health Organization (WHO). Morocco National Survey on Population and Family Health 2010-2011. |
| Survey                | Cross-sectional, Household, Individual, Nationally representative, Urban-rural representative                       | Country       | Morocco   | 10/2017 to 01/2018  | Ministry of Health (Morocco), Pan Arab Project for Family Health (PAPFAM), United Nations Children's Fund (UNICEF), United Nations Population Fund (UNFPA), World Health Organization (WHO). Morocco National Survey on Population and Family Health 2017-2018. |
| Survey                | Household                                                                                                           | Country       | Morocco   | 03/2017 to 05/2017  | Ministry of Health (Morocco), World Health Organization (WHO). Morocco STEPS Noncommunicable Disease Risk Factors Survey 2017.                                                                                                                                  |
| Survey                | Cross-sectional, GPS coordinates (GIS), Household, Individual, Interview, Nationally representative, Verbal autopsy | Country       | Morocco   | 04/2003 to 07/2003  | World Health Organization (WHO). Morocco World Health Survey 2003. Geneva, Switzerland: World Health Organization (WHO), 2005.                                                                                                                                  |

| Data type             | Secondary data type                                                                                         | Coverage type | Geography                                                                                                                                                                                                                                                                                                                      | Time period covered | Suggested citation                                                                                                                                                                                                                                                   |
|-----------------------|-------------------------------------------------------------------------------------------------------------|---------------|--------------------------------------------------------------------------------------------------------------------------------------------------------------------------------------------------------------------------------------------------------------------------------------------------------------------------------|---------------------|----------------------------------------------------------------------------------------------------------------------------------------------------------------------------------------------------------------------------------------------------------------------|
| Scientific literature | NA                                                                                                          | Country       | Algeria, Argentina, Bahrain, Bangladesh, China, Egypt, India, Indonesia, Iran (Islamic Republic of), Jordan, Kuwait, Libya, Malaysia, Mexico, Morocco, Pakistan, Philippines, Qatar, Russian Federation, Saudi Arabia, Singapore, Republic of Korea, Taiwan (Province of China), Tunisia, Turkiye, United Arab Emirates, Yemen | 01/2009 to 12/2010  | Litwak L, Goh SY, Hussein Z, Malek R, Prusty V, Khamseh ME. Prevalence of diabetes complications in people in type 2 diabetes mellitus and its association with baseline characteristics in the multinational A1chieve study . Diabetol Metab Syndr. 2013; 5(1): 57. |
| Scientific literature | NA                                                                                                          | NA            | Oman                                                                                                                                                                                                                                                                                                                           | 01/2006 to 12/2006  | Khandekar RB, Tirumurthy S, Al-Harby S, Moorthy NS, Amir I. Diabetic retinopathy and ocular co-morbidities among persons with diabetes at Sumail Hospital of Oman. Diabetes Technol Ther. 2009; 11(10): 675-9.                                                       |
| Scientific literature | NA                                                                                                          | NA            | Oman                                                                                                                                                                                                                                                                                                                           | 01/2000 to 12/2001  | Khandekar R, Al Lawatii J, Mohammed AJ, Al Raisi A. Diabetic retinopathy in Oman: a hospital based study. Br J Ophthalmol. 2003; 87(9): 1061-4.                                                                                                                      |
| Scientific literature | NA                                                                                                          | NA            | Oman                                                                                                                                                                                                                                                                                                                           | 01/1991 to 12/1991  | Asfour MG, Lambourne A, Soliman A, Al-Behlani S, Al-Asfoor D, Bold A, Mahtab H, King H. High prevalence of diabetes mellitus and impaired glucose tolerance in the Sultanate of Oman: results of the 1991 national survey. Diabet Med. 1995; 12(12): 1122-5.         |
| Survey                | Household                                                                                                   | Subnational   | Oman, Ash Sharqf' yah                                                                                                                                                                                                                                                                                                          | 03/2006 to 06/2006  | Ministry of Health (Oman), World Health Organization (WHO). Oman - Ash Sharqf' yah STEPS Noncommunicable Disease Risk Factors Survey 2006.                                                                                                                           |
| Report                | NA                                                                                                          | Country       | Oman                                                                                                                                                                                                                                                                                                                           | 01/2009 to 12/2009  | Ministry of Health (Oman). Oman Annual Health Report 2009. Muscat, Oman: Ministry of Health (Oman)                                                                                                                                                                   |
| Report                | Subnationally representative                                                                                | Country       | Oman                                                                                                                                                                                                                                                                                                                           | 01/2012 to 12/2012  | Ministry of Health (Oman). Oman Annual Health Report 2012. Muscat, Oman: Ministry of Health (Oman).                                                                                                                                                                  |
| Report                | Discharge, Epi surveillance, Inpatient, Nationally representative, Outpatient, Subnationally representative | Country       | Oman                                                                                                                                                                                                                                                                                                                           | 01/1970 to 12/2016  | Ministry of Health (Oman). Oman Annual Health Report 2016. Muscat, Oman: Ministry of Health (Oman).                                                                                                                                                                  |
| Report                | Discharge, Epi surveillance, Inpatient, Outpatient, Subnationally representative                            | Country       | Oman                                                                                                                                                                                                                                                                                                                           | 01/1985 to 12/2018  | Ministry of Health (Oman). Oman Annual Health Report 2018. Muscat, Oman: Ministry of Health (Oman).                                                                                                                                                                  |
| Report                | Discharge, Epi surveillance, Inpatient, Nationally representative, Outpatient, Subnationally representative | Country       | Oman                                                                                                                                                                                                                                                                                                                           | 01/1980 to 12/1989  | Ministry of Health (Oman). Oman Annual Statistical Report 1989. Muscat, Oman: Ministry of Health (Oman).                                                                                                                                                             |
| Report                | Discharge, Epi surveillance, Inpatient, Nationally representative, Outpatient, Subnationally representative | Country       | Oman                                                                                                                                                                                                                                                                                                                           | 01/1980 to 12/1990  | Ministry of Health (Oman). Oman Annual Statistical Report 1990. Muscat, Oman: Ministry of Health (Oman).                                                                                                                                                             |
| Report                | Discharge, Epi surveillance, Inpatient, Nationally representative, Outpatient, Subnationally representative | Country       | Oman                                                                                                                                                                                                                                                                                                                           | 01/1980 to 12/1991  | Ministry of Health (Oman). Oman Annual Statistical Report 1991. Muscat, Oman: Ministry of Health (Oman).                                                                                                                                                             |
| Report                | Discharge, Epi surveillance, Inpatient, Nationally representative, Outpatient, Subnationally representative | Country       | Oman                                                                                                                                                                                                                                                                                                                           | 01/1980 to 12/1992  | Ministry of Health (Oman). Oman Annual Statistical Report 1992. Muscat, Oman: Ministry of Health (Oman).                                                                                                                                                             |
| Report                | Discharge, Epi surveillance, Inpatient, Nationally representative, Outpatient, Subnationally representative | Country       | Oman                                                                                                                                                                                                                                                                                                                           | 01/1980 to 12/1993  | Ministry of Health (Oman). Oman Annual Statistical Report 1993. Muscat, Oman: Ministry of Health (Oman).                                                                                                                                                             |
| Report                | Discharge, Epi surveillance, Inpatient, Outpatient, Subnationally representative                            | Country       | Oman                                                                                                                                                                                                                                                                                                                           | 01/1994 to 12/1994  | Ministry of Health (Oman). Oman Annual Statistical Report 1994. Muscat, Oman: Ministry of Health (Oman), 1995.                                                                                                                                                       |
| Survey                | Household, Individual, Interview                                                                            | Country       | Oman                                                                                                                                                                                                                                                                                                                           | 01/1995 to 12/1995  | Health Ministers,Å Council for GCC States, Ministry of Health (Oman). Oman Family Health Survey 1995.                                                                                                                                                                |
| Survey                | Household                                                                                                   | Country       | Oman                                                                                                                                                                                                                                                                                                                           | 01/2000 to 03/2000  | Ministry of Health (Oman). Oman National Health Survey 2000. Muscat, Oman: Ministry of Health (Oman).                                                                                                                                                                |
| Survey                | Cross-sectional, Individual, Interview, Nationally representative                                           | Country       | Oman                                                                                                                                                                                                                                                                                                                           | 01/2017 to 04/2017  | Ministry of Health (Oman), World Health Organization (WHO). Oman STEPS Noncommunicable Disease Risk Factors Survey 2017.                                                                                                                                             |

| Data type             | Secondary data type                                                                                                         | Coverage type | Geography                          | Time period covered | Suggested citation                                                                                                                                                                                                                                                                                              |
|-----------------------|-----------------------------------------------------------------------------------------------------------------------------|---------------|------------------------------------|---------------------|-----------------------------------------------------------------------------------------------------------------------------------------------------------------------------------------------------------------------------------------------------------------------------------------------------------------|
| Survey                | Cross-sectional, Household, Individual, Interview, Nationally representative                                                | Country       | Oman                               | 12/2007 to 05/2008  | Ministry of Health (Oman), World Health Organization (WHO). Oman World Health Survey 2007-2008.                                                                                                                                                                                                                 |
| Scientific literature | NA                                                                                                                          | NA            | Oman, Ash Sharqf'yah, Saudi Arabia | 01/2004 to 12/2005  | Almajwal AM, Al-Baghli NA, Batterham MJ, Williams PG, Al-Turki KA, Al-Ghamdi AJ. Performance of body mass index in predicting diabetes and hypertension in the Eastern Province of Saudi Arabia. Ann Saudi Med. 2009; 29(6): 437-445.                                                                           |
| Scientific literature | NA                                                                                                                          | NA            | Oman                               | 01/1996 to 12/1997  | el Haddad OA, Saad MK. Prevalence and risk factors for diabetic retinopathy among Omani diabetics. Br J Ophthalmol. 1998; 82(8): 901-6.                                                                                                                                                                         |
| Scientific literature | NA                                                                                                                          | NA            | Oman                               | 01/2001 to 12/2001  | Al-Lawati JA, Mohammed AJ, Al-Hinai HQ, Jousilahti P. Prevalence of the metabolic syndrome among Omani adults. Diabetes Care. 2003; 26(6): 1781-5.                                                                                                                                                              |
| Scientific literature | NA                                                                                                                          | NA            | Palestine                          | 01/1998 to 12/1998  | Abdul-Rahim HF, Husseini A, Giacaman R, Jervell J, Bjertness E. Diabetes mellitus in an urban Palestinian population: prevalence and associated factors. East Mediterr Health J. 2001; 7(1-2): 67-78.                                                                                                           |
| Scientific literature | NA                                                                                                                          | NA            | Palestine                          | 01/2005 to 12/2005  | Abu Sham, A. H, Darwazah AK, Kufri FH, Yassin IH, Torok NI. MetS and cardiovascular risk factors among Palestinians of East Jerusalem. East Mediterr Health J. 2009; 15(6): 1464-1473.                                                                                                                          |
| Survey                | Cross-sectional, Household, Individual, Interview, Subnationally representative, Urban-rural representative                 | Country       | Palestine, Gaza Strip, West Bank   | 04/2000 to 05/2000  | Ministry of Health (Palestine), Palestinian Central Bureau of Statistics, United Nations Children's Fund (UNICEF), United Nations Population Fund (UNFPA). Palestine - West Bank and Gaza Strip Multiple Indicator Cluster Survey 2000. Ramallah, Palestine: Palestinian Central Bureau of Statistics.          |
| Survey                | Cross-sectional, Household, Individual, Interview, Subnationally representative, Urban-rural representative                 | Country       | Palestine, Gaza Strip, West Bank   | 04/2000 to 05/2000  | Ministry of Health (Palestine), Palestinian Central Bureau of Statistics, United Nations Children's Fund (UNICEF), United Nations Population Fund (UNFPA). Palestine - West Bank and Gaza Strip Multiple Indicator Cluster Survey 2000 - UNICEF. Ramallah, Palestine: Palestinian Central Bureau of Statistics. |
| Survey                | Household, Nationally representative                                                                                        | Country       | Palestine                          | 05/2004 to 07/2004  | Palestinian Central Bureau of Statistics. Palestine Demographic and Health Survey 2004.                                                                                                                                                                                                                         |
| Survey                | Household                                                                                                                   | Country       | Palestine                          | 01/2005 to 01/2006  | Palestinian Central Bureau of Statistics. Palestine Domestic Violence Survey 2005-2006.                                                                                                                                                                                                                         |
| Survey                | Cross-sectional, Household, Individual, Interview                                                                           | Country       | Palestine                          | 11/2006 to 03/2007  | League of Arab States, Palestinian Central Bureau of Statistics, United Nations Children's Fund (UNICEF). Palestine Family Health Survey 2006-2007.                                                                                                                                                             |
| Report                | Epi surveillance, Nationally representative, Subnationally representative                                                   | Country       | Palestine                          | 01/2000 to 12/2018  | Ministry of Health (Palestine). Palestine Health Annual Report 2018. Nablus, Palestine: Ministry of Health (Palestine), 2019.                                                                                                                                                                                   |
| Report                | Subnationally representative                                                                                                | Country       | Palestine                          | 01/1996 to 12/1999  | Ministry of Health (Palestine). Palestine Health Status Annual Report 1999. Nablus, Palestine: Ministry of Health (Palestine).                                                                                                                                                                                  |
| Report                | Subnationally representative                                                                                                | Country       | Palestine                          | 01/2000 to 12/2000  | Ministry of Health (Palestine). Palestine Health Status Annual Report 2000. Nablus, Palestine: Ministry of Health (Palestine), 2001.                                                                                                                                                                            |
| Report                | Epi surveillance, Subnationally representative                                                                              | Country       | Palestine                          | 01/1997 to 12/2001  | Ministry of Health (Palestine). Palestine Health Status Annual Report 2001. Nablus, Palestine: Ministry of Health (Palestine), 2002.                                                                                                                                                                            |
| Report                | Epi surveillance, Subnationally representative                                                                              | Country       | Palestine                          | 01/2002 to 12/2011  | Ministry of Health (Palestine). Palestine Health Status Annual Report 2011. Nablus, Palestine: Ministry of Health (Palestine), 2012.                                                                                                                                                                            |
| Report                | Epi surveillance, Subnationally representative                                                                              | Country       | Palestine                          | 01/2002 to 12/2012  | Ministry of Health (Palestine). Palestine Health Status Annual Report 2012. Nablus, Palestine: Ministry of Health (Palestine), 2013.                                                                                                                                                                            |
| Report                | Epi surveillance, Subnationally representative                                                                              | Country       | Palestine                          | 01/2007 to 12/2013  | Ministry of Health (Palestine). Palestine Health Status Annual Report 2013. Nablus, Palestine: Ministry of Health (Palestine), 2014.                                                                                                                                                                            |
| Report                | Epi surveillance, Subnationally representative                                                                              | Country       | Palestine                          | 01/2008 to 12/2014  | Ministry of Health (Palestine). Palestine Health Status Annual Report 2014. Nablus, Palestine: Ministry of Health (Palestine), 2015.                                                                                                                                                                            |
| Report                | Epi surveillance, Subnationally representative                                                                              | Country       | Palestine                          | 01/2009 to 12/2015  | Ministry of Health (Palestine). Palestine Health Status Annual Report 2015. Nablus, Palestine: Ministry of Health (Palestine), 2016.                                                                                                                                                                            |
| Report                | Epi surveillance, Subnationally representative                                                                              | Country       | Palestine                          | 01/2009 to 12/2016  | Ministry of Health (Palestine). Palestine Health Status Annual Report 2016. Nablus, Palestine: Ministry of Health (Palestine), 2016.                                                                                                                                                                            |
| Report                | Epi surveillance, Subnationally representative                                                                              | Country       | Palestine                          | 01/1988 to 12/2017  | Ministry of Health (Palestine). Palestine Health Status Annual Report 2017. Nablus, Palestine: Ministry of Health (Palestine), 2018.                                                                                                                                                                            |
| Survey                | Cross-sectional, Individual, Interview, Nationally representative, Subnationally representative, Urban-rural representative | Country       | Palestine                          | 05/2010 to 09/2010  | Ministry of Health (Palestine), Palestinian Central Bureau of Statistics, United Nations Children's Fund (UNICEF), United Nations Population Fund (UNFPA). Palestine Multiple Indicator Cluster Survey 2010. New York, United States of America: United Nations Children's Fund (UNICEF), 2014.                 |

| Data type             | Secondary data type                                                                                                                    | Coverage type | Geography                                                                                                                                                                                                                                                                                                                      | Time period covered | Suggested citation                                                                                                                                                                                                                                                                                                                                                                                                       |
|-----------------------|----------------------------------------------------------------------------------------------------------------------------------------|---------------|--------------------------------------------------------------------------------------------------------------------------------------------------------------------------------------------------------------------------------------------------------------------------------------------------------------------------------|---------------------|--------------------------------------------------------------------------------------------------------------------------------------------------------------------------------------------------------------------------------------------------------------------------------------------------------------------------------------------------------------------------------------------------------------------------|
| Survey                | Cross-sectional, Household, Individual, Interview, Nationally representative                                                           | Country       | Palestine                                                                                                                                                                                                                                                                                                                      | 10/1999 to 10/2000  | Al-Quds Nutrition and Health Research Institute, Al-Quds University, Ministry of Health (Palestine), Operational Research Laboratory for Health and Nutrition, Al-Quds University, Palestinian Central Bureau of Statistics. Palestine National Health And Nutrition Survey 1999-2000.                                                                                                                                   |
| Survey                | Cross-sectional, Household, Individual, Interview, Nationally representative, Subnationally representative, Urban-rural representative | Country       | Palestine                                                                                                                                                                                                                                                                                                                      | 03/2002 to 06/2002  | Birzeit University, Palestinian Central Bureau of Statistics. Palestine Nutrition Survey 2002. Ramallah, Palestine: Palestinian Central Bureau of Statistics.                                                                                                                                                                                                                                                            |
| Survey                | Household, Interview                                                                                                                   | Country       | Palestine                                                                                                                                                                                                                                                                                                                      | 04/2010 to 03/2011  | Ministry of Health (Palestine), World Health Organization (WHO). Palestine STEPS Noncommunicable Disease Risk Factors Survey 2010-2011. Geneva, Switzerland: World Health Organization (WHO).                                                                                                                                                                                                                            |
| Scientific literature | NA                                                                                                                                     | NA            | Palestine                                                                                                                                                                                                                                                                                                                      | 01/1996 to 12/1996  | Husseini A, Abdul-Rahim H, Awartani F, Jervell J, Bjertness E. Prevalence of diabetes mellitus and impaired glucose tolerance in a rural Palestinian population. <i>East Mediterr Health J.</i> 2000; 6(5-6): 1039-45.                                                                                                                                                                                                   |
| Scientific literature | NA                                                                                                                                     | NA            | Palestine                                                                                                                                                                                                                                                                                                                      | 01/2015 to 12/2015  | Abu Al-Halaweh A, Davidovitch N, Almdal TP, Cowan A, Khatib S, Nasser-Eddin L, Baradia Z. Prevalence of type 2 diabetes mellitus complications among palestinians with T2DM. 2017; 11 Suppl 2: S783-S787.                                                                                                                                                                                                                |
| Scientific literature | NA                                                                                                                                     | NA            | Palestine                                                                                                                                                                                                                                                                                                                      | 01/2008 to 12/2008  | Chiang F, Kuper H, Lindfield R, Keenan T, Seyam N, Magauran D, Khalilia N, Batta H, Abdeen Z, Sargent N. Rapid assessment of avoidable blindness in the Occupied Palestinian Territories. <i>PLoS One.</i> 2010; 5(7): e11854.                                                                                                                                                                                           |
| Scientific literature | NA                                                                                                                                     | NA            | Palestine                                                                                                                                                                                                                                                                                                                      | 01/1999 to 12/2000  | Husseini A, Abdul-Rahim H, Awartani F, Giacaman R, Jervell J, Bjertness E. Type 2 diabetes mellitus, impaired glucose tolerance and associated factors in a rural Palestinian village. <i>Diabet Med.</i> 2000; 17(10): 746-8.                                                                                                                                                                                           |
| Scientific literature | NA                                                                                                                                     | NA            | Qatar                                                                                                                                                                                                                                                                                                                          | 01/2009 to 12/2009  | Elshafei M, Gamra H, Khandekar R, Al Hashimi M, Pai A, Ahmed MF. Prevalence and determinants of diabetic retinopathy among persons ,â• 40 years of age with diabetes in Qatar: a community-based survey. <i>Eur J Ophthalmol.</i> 2011; 21(1): 39-47.                                                                                                                                                                    |
| Scientific literature | NA                                                                                                                                     | Country       | Algeria, Argentina, Bahrain, Bangladesh, China, Egypt, India, Indonesia, Iran (Islamic Republic of), Jordan, Kuwait, Libya, Malaysia, Mexico, Morocco, Pakistan, Philippines, Qatar, Russian Federation, Saudi Arabia, Singapore, Republic of Korea, Taiwan (Province of China), Tunisia, Turkiye, United Arab Emirates, Yemen | 01/2009 to 12/2010  | Litwak L, Goh SY, Hussein Z, Malek R, Prusty V, Khamseh ME. Prevalence of diabetes complications in people in type 2 diabetes mellitus and its association with baseline characteristics in the multinational A1chieve study . <i>Diabetol Metab Syndr.</i> 2013; 5(1): 57.                                                                                                                                              |
| Scientific literature | NA                                                                                                                                     | NA            | Qatar                                                                                                                                                                                                                                                                                                                          | 01/2008 to 12/2008  | Bener A, Zirie M, Janahi IM, Al-Hamaq AO, Musallam M, Wareham NJ. Prevalence of diagnosed and undiagnosed diabetes mellitus and its risk factors in a population-based study of Qatar. <i>Diabetes Res Clin Pract.</i> 2009; 84(1): 99-106.                                                                                                                                                                              |
| Administrative data   | Discharge, Inpatient                                                                                                                   | Country       | Qatar                                                                                                                                                                                                                                                                                                                          | 01/2002 to 12/2002  | Hamad Medical Corporation (Qatar). Qatar - Annual Inpatients Discharge Abstract: Hamad General Hospital 2002. Doha, Qatar: Hamad Medical Corporation (Qatar).                                                                                                                                                                                                                                                            |
| Administrative data   | Discharge, Inpatient                                                                                                                   | Country       | Qatar                                                                                                                                                                                                                                                                                                                          | 01/2003 to 12/2003  | Hamad Medical Corporation (Qatar). Qatar - Annual Inpatients Discharge Abstract: Hamad General Hospital and Women's Hospital 2003. Doha, Qatar: Hamad Medical Corporation (Qatar).                                                                                                                                                                                                                                       |
| Survey                | Cross-sectional, Household, Individual, Interview, Nationally representative                                                           | Country       | Qatar                                                                                                                                                                                                                                                                                                                          | 03/1998 to 05/1998  | Arab Fund for Economic and Social Development (AFESD), Arab Gulf Program for Development (AGFUND), Central Statistical Organization (Qatar), Health Ministers,Â Council for GCC States, Ministry of Public Health (Qatar), United Nations Children's Fund (UNICEF), United Nations Population Fund (UNFPA), United Nations Statistics Division (UNSD), World Health Organization (WHO). Qatar Family Health Survey 1998. |
| Survey                | Household, Interview, Nationally representative                                                                                        | Country       | Qatar                                                                                                                                                                                                                                                                                                                          | 03/2012 to 05/2012  | Qatar Statistics Authority, Supreme Council of Health (Qatar), World Health Organization (WHO). Qatar STEPS Noncommunicable Disease Risk Factors Survey 2012. Geneva, Switzerland: World Health Organization (WHO).                                                                                                                                                                                                      |
| Vital registration    | Subnationally representative                                                                                                           | Country       | Qatar                                                                                                                                                                                                                                                                                                                          | 01/2005 to 12/2014  | Ministry of Development Planning and Statistics (Qatar), Supreme Council of Health (Qatar). Qatar Vital Statistics Annual Bulletin 2014. Doha, Qatar: Ministry of Development Planning and Statistics (Qatar), 2016.                                                                                                                                                                                                     |
| Vital registration    | Subnationally representative                                                                                                           | Country       | Qatar                                                                                                                                                                                                                                                                                                                          | 01/2006 to 12/2015  | Ministry of Development Planning and Statistics (Qatar), Supreme Council of Health (Qatar). Qatar Vital Statistics Annual Bulletin 2015. Doha, Qatar: Ministry of Development Planning and Statistics (Qatar), 2016.                                                                                                                                                                                                     |
| Vital registration    | Subnationally representative                                                                                                           | Country       | Qatar                                                                                                                                                                                                                                                                                                                          | 01/2007 to 12/2016  | Ministry of Development Planning and Statistics (Qatar), Supreme Council of Health (Qatar). Qatar Vital Statistics Annual Bulletin 2016. Doha, Qatar: Ministry of Development Planning and Statistics (Qatar), 2017.                                                                                                                                                                                                     |

| Data type             | Secondary data type                     | Coverage type | Geography                         | Time period covered | Suggested citation                                                                                                                                                                                                                                                    |
|-----------------------|-----------------------------------------|---------------|-----------------------------------|---------------------|-----------------------------------------------------------------------------------------------------------------------------------------------------------------------------------------------------------------------------------------------------------------------|
| Vital registration    | Subnationally representative            | Country       | Qatar                             | 01/2007 to 12/2017  | Ministry of Development Planning and Statistics (Qatar), Supreme Council of Health (Qatar). Qatar Vital Statistics Annual Bulletin 2017. Doha, Qatar: Ministry of Development Planning and Statistics (Qatar), 2018.                                                  |
| Vital registration    | Subnationally representative            | Country       | Qatar                             | 01/2009 to 12/2018  | Planning and Statistics Authority (PSA) (Qatar). Qatar Vital Statistics Annual Bulletin 2018. Planning and Statistics Authority (PSA) (Qatar), 2019.                                                                                                                  |
| Survey                | NA                                      | Country       | Qatar                             | 04/2006 to 05/2006  | National Health Authority (Qatar), Qatar Statistics Authority, World Health Organization (WHO). Qatar World Health Survey 2006.                                                                                                                                       |
| Scientific literature | NA                                      | NA            | Syrian Arab Republic              | 01/2006 to 12/2006  | Albache N, Al Ali R, Rastam S, Fouad FM, Mzayek F, Maziak W. Epidemiology of Type 2 diabetes mellitus in Aleppo, Syria. <i>J Diabetes</i> . 2010; 2(2): 85-91.                                                                                                        |
| Survey                | Household, Subnationally representative | Country       | Syrian Arab Republic              | 03/2006 to 05/2006  | General Administration for Palestine Arab Refugees (GAPAR), Palestinian Central Bureau of Statistics, Pan Arab Project for Family Health (PAPFAM), United Nations Children's Fund (UNICEF). Palestinians in Syria Multiple Indicator Cluster Survey 2006.             |
| Survey                | Household                               | Subnational   | Syrian Arab Republic, Aleppo      | 05/2004 to 08/2004  | Syrian Center for Tobacco Studies. Syria - Aleppo Household Survey 2004.                                                                                                                                                                                              |
| Scientific literature | NA                                      | NA            | Saudi Arabia                      | 01/1989 to 12/2004  | Alwakeel JS, Al-Suwaida A, Isnani AC, Al-Harbi A, Alam A. Concomitant macro and microvascular complications in diabetic nephropathy. <i>Saudi J Kidney Dis Transpl</i> . 2009; 20(3): 402-9.                                                                          |
| Scientific literature | NA                                      | NA            | Saudi Arabia, Ar Riyāḥ            | 01/2009 to 12/2010  | Al-Daghri NM, Al-Attas OS, Alokail MS, Alkharfy KM, Sabico SLB, Chrousos GP. Decreasing prevalence of the full metabolic syndrome but a persistently high prevalence of dyslipidemia among adult Arabs. <i>PLoS One</i> . 2010; 5(8): e12159.                         |
| Scientific literature | NA                                      | NA            | Saudi Arabia                      | 01/1994 to 12/1995  | El-Hazmi MA, Warsy AS, Al-Swailem AR, Al-Swailem AM, Sulaimani R, Al-Meshari AA. Diabetes mellitus and impaired glucose tolerance in Saudi Arabia. <i>Ann Saudi Med</i> . 1996; 16(4): 381-5.                                                                         |
| Scientific literature | NA                                      | NA            | Saudi Arabia                      | 01/1998 to 12/1998  | Al-Nozha MM, Al-Maatouq MA, Al-Mazrou YY, Al-Harhi SS, Arafah MR, Khalil MZ, Khan NB, Al-Khadra A, Al-Marzouki K, Nouh MS, Abdullah M, Attas O, Al-Shahid MS, Al-Mobeireek A. Diabetes mellitus in Saudi Arabia. <i>Saudi Med J</i> . 2004; 25(11): 1603-10.          |
| Scientific literature | NA                                      | NA            | Saudi Arabia                      | 01/2009 to 12/2010  | Al-Daghri NM, Al-Attas OS, Alokail MS, Alkharfy KM, Yousef M, Sabico SL, Chrousos GP. Diabetes mellitus type 2 and other chronic non-communicable diseases in the central region, Saudi Arabia (Riyadh cohort 2): a decade of an epidemic. <i>BMC Med</i> . 2011; 76. |
| Scientific literature | NA                                      | NA            | Saudi Arabia                      | 01/1994 to 12/1994  | Warsy AS, el-Hazmi MA. Diabetes mellitus, hypertension and obesity--common multifactorial disorders in Saudis. <i>East Mediterr Health J</i> . 1999; 5(6): 1236-42.                                                                                                   |
| Scientific literature | NA                                      | NA            | Saudi Arabia                      | 01/2000 to 12/2012  | Al-Rubeaan K, Al Derwish M, Ouizi S, Youssef AM, Subhani SN, Ibrahim HM, Alamri BN. Diabetic foot complications and their risk factors from a large retrospective cohort study. <i>PLoS One</i> . 2015; 10(5): e0124446.                                              |
| Scientific literature | NA                                      | NA            | Saudi Arabia                      | 01/1985 to 12/1987  | Anokute CC. Epidemiologic studies of diabetes mellitus in Saudi Arabia--Part I--Screening of 3158 males in King Saud University. <i>J R Soc Health</i> . 1990; 110(6): 201-3.                                                                                         |
| Scientific literature | NA                                      | NA            | Saudi Arabia                      | 01/2004 to 12/2009  | Habeb AM, Al-Magamsi MS, Halabi S, Eid IM, Shalaby S, Bakoush O. High incidence of childhood type 1 diabetes in Al-Madinah, North West Saudi Arabia (2004-2009). <i>Pediatr Diabetes</i> . 2011; 12(8): 676-81.                                                       |
| Scientific literature | NA                                      | NA            | Saudi Arabia                      | 01/1990 to 12/2007  | Al-Mendalawi MD, Abduljabbar MA, Aljubeih JM, Amalraj A, Cherian MP. Incidence trends of childhood type 1 diabetes in eastern Saudi Arabia. <i>Saudi Med J</i> . 2010; 31(9): 1074-1075.                                                                              |
| Scientific literature | NA                                      | NA            | Saudi Arabia                      | 01/2001 to 12/2010  | Habeb AM, Al-Magamsi MSF, Eid IM, Ali MI, Hattersley AT, Hussain K, Ellard S. Incidence, genetics, and clinical phenotype of permanent neonatal diabetes mellitus in northwest Saudi Arabia. <i>Pediatr Diabetes</i> . 2012; 13(6): 499-505.                          |
| Scientific literature | NA                                      | NA            | Saudi Arabia                      | 01/2007 to 12/2009  | Al-Rubeaan K. National surveillance for type 1, type 2 diabetes and prediabetes among children and adolescents: a population-based study (SAUDI-DM). <i>J Epidemiol Community Health</i> . 2015; nan.                                                                 |
| Scientific literature | NA                                      | NA            | Oman, Ash Sharqiyah, Saudi Arabia | 01/2004 to 12/2005  | Almajwal AM, Al-Baghli NA, Batterham MJ, Williams PG, Al-Turki KA, Al-Ghamdi AJ. Performance of body mass index in predicting diabetes and hypertension in the Eastern Province of Saudi Arabia. <i>Ann Saudi Med</i> . 2009; 29(6): 437-445.                         |
| Scientific literature | NA                                      | NA            | Saudi Arabia                      | 01/1995 to 12/1996  | Nielsen JV. Peripheral neuropathy, hypertension, foot ulcers and amputations among Saudi Arabian patients with type 2 diabetes. <i>Diabetes Res Clin Pract</i> . 1998; 41(1): 63-9.                                                                                   |
| Scientific literature | NA                                      | NA            | Saudi Arabia                      | 01/2011 to 12/2012  | Hajar S, Al Hazmi A, Wasli M, Mousa A, Rabiou M. Prevalence and causes of blindness and diabetic retinopathy in Southern Saudi Arabia. <i>Saudi Med J</i> . 2015; 36(4): 449-55.                                                                                      |
| Scientific literature | NA                                      | NA            | Saudi Arabia                      | 01/2009 to 12/2010  | Wang DD, Bakhotmah BA, Hu FB, Alzahrani HA. Prevalence and correlates of diabetic peripheral neuropathy in a Saudi Arabic population: a cross-sectional study. <i>PLoS One</i> . 2014; 9(9): e106935.                                                                 |
| Scientific literature | NA                                      | NA            | Saudi Arabia                      | 01/2007 to 12/2009  | Khan AR, Wiseberg JA, Lateef ZA, Khan SA. Prevalence and determinants of diabetic retinopathy in Al hasa region of Saudi Arabia: primary health care centre based cross-sectional survey, 2007-2009. <i>Middle East Afr J Ophthalmol</i> . 2010; 17(3): 257-63.       |

| Data type             | Secondary data type                                                                                      | Coverage type | Geography                                                                                                                                                                                                                                                                                                                      | Time period covered | Suggested citation                                                                                                                                                                                                                                                                                                                                                               |
|-----------------------|----------------------------------------------------------------------------------------------------------|---------------|--------------------------------------------------------------------------------------------------------------------------------------------------------------------------------------------------------------------------------------------------------------------------------------------------------------------------------|---------------------|----------------------------------------------------------------------------------------------------------------------------------------------------------------------------------------------------------------------------------------------------------------------------------------------------------------------------------------------------------------------------------|
| Scientific literature | NA                                                                                                       | Country       | Algeria, Argentina, Bahrain, Bangladesh, China, Egypt, India, Indonesia, Iran (Islamic Republic of), Jordan, Kuwait, Libya, Malaysia, Mexico, Morocco, Pakistan, Philippines, Qatar, Russian Federation, Saudi Arabia, Singapore, Republic of Korea, Taiwan (Province of China), Tunisia, Turkiye, United Arab Emirates, Yemen | 01/2009 to 12/2010  | Litwak L, Goh SY, Hussein Z, Malek R, Prusty V, Khamseh ME. Prevalence of diabetes complications in people in type 2 diabetes mellitus and its association with baseline characteristics in the multinational A1chieve study . Diabetol Metab Syndr. 2013; 5(1): 57.                                                                                                             |
| Scientific literature | NA                                                                                                       | NA            | Saudi Arabia                                                                                                                                                                                                                                                                                                                   | 01/2004 to 12/2005  | Al-Baghli NA, Al-Ghamdi AJ, Al-Turki KA, Al Elq AH, El-Zubaier AG, Bahnassy A. Prevalence of diabetes mellitus and impaired fasting glucose levels in the Eastern Province of Saudi Arabia: results of a screening campaign. Singapore Med J. 2010; 51(12): 923-30.                                                                                                              |
| Scientific literature | NA                                                                                                       | NA            | Saudi Arabia                                                                                                                                                                                                                                                                                                                   | 01/2009 to 12/2009  | Alqurashi KA, Aljabri KS, Bokhari SA. Prevalence of diabetes mellitus in a Saudi community. Ann Saudi Med. 2011; 31(1): 19-23.                                                                                                                                                                                                                                                   |
| Scientific literature | NA                                                                                                       | NA            | Saudi Arabia                                                                                                                                                                                                                                                                                                                   | 01/1990 to 12/2006  | Al-Herbish AS, El-Mouzan MI, Al-Salloum AA, Al-Qurachi MM, Al-Omar AA. Prevalence of type 1 diabetes mellitus in Saudi Arabian children and adolescents. Saudi Med J. 2008; 29(9): 1285-8.                                                                                                                                                                                       |
| Scientific literature | NA                                                                                                       | NA            | Saudi Arabia                                                                                                                                                                                                                                                                                                                   | 01/2006 to 12/2007  | Halawa MR, Karawagh A, Zeidan A, Mahmoud AE, Sakr M, Hegazy A. Prevalence of painful diabetic peripheral neuropathy among patients suffering from diabetes mellitus in Saudi Arabia. Curr Med Res Opin. 2010; 26(2): 337-43.                                                                                                                                                     |
| Scientific literature | NA                                                                                                       | Subnational   | Saudi Arabia                                                                                                                                                                                                                                                                                                                   | 01/2009 to 12/2011  | Al Ghamdi AH, Rabiou M, Hajar S, Yorston D, Kuper H, Polack S. Rapid assessment of avoidable blindness and diabetic retinopathy in Taif, Saudi Arabia. Br J Ophthalmol. 2012; 96(9): 1168-72.                                                                                                                                                                                    |
| Scientific literature | NA                                                                                                       | NA            | Saudi Arabia                                                                                                                                                                                                                                                                                                                   | 01/1996 to 12/1997  | El-Asrar AM, Al-Rubeaan KA, Al-Amro SA, Kangave D, Moharram OA. Risk factors for diabetic retinopathy among Saudi diabetics. Int Ophthalmol. 1998; 22(3): 155-61.                                                                                                                                                                                                                |
| Report                | NA                                                                                                       | Country       | Saudi Arabia                                                                                                                                                                                                                                                                                                                   | 01/1993 to 12/2012  | Ministry of Health (Saudi Arabia), World Health Organization (WHO). Saudi Arabia Country Cooperation Strategy for WHO 2014-2015.                                                                                                                                                                                                                                                 |
| Survey                | Cross-sectional, Household, Individual, Interview, Nationally representative, Urban-rural representative | Country       | Saudi Arabia                                                                                                                                                                                                                                                                                                                   | 11/1996 to 01/1997  | Arab Fund for Economic and Social Development (AFESD), Arab Gulf Program for Development (AGFUND), Gulf-Co-operation Council (GCC), Ministry of Health (Saudi Arabia), United Nations Children's Fund (UNICEF), United Nations Population Fund (UNFPA), United Nations Statistics Division (UNSD), World Health Organization (WHO). Saudi Arabia Family Health Survey 1996-1997. |
| Survey                | Household, Interview, Nationally representative, Subnationally representative                            | Country       | Saudi Arabia                                                                                                                                                                                                                                                                                                                   | 01/2013 to 12/2013  | Institute for Health Metrics and Evaluation (IHME), Ministry of Health (Saudi Arabia). Saudi Arabia Health Interview Survey 2013.                                                                                                                                                                                                                                                |
| Report                | NA                                                                                                       | Country       | Saudi Arabia                                                                                                                                                                                                                                                                                                                   | 01/1994 to 12/1999  | Ministry of Health (Saudi Arabia). Saudi Arabia Health Statistical Yearbook 1999. Riyadh, Saudi Arabia: Ministry of Health (Saudi Arabia).                                                                                                                                                                                                                                       |
| Report                | NA                                                                                                       | Country       | Saudi Arabia                                                                                                                                                                                                                                                                                                                   | 01/1991 to 12/2000  | Ministry of Health (Saudi Arabia). Saudi Arabia Health Statistical Yearbook 2000. Riyadh, Saudi Arabia: Ministry of Health (Saudi Arabia).                                                                                                                                                                                                                                       |
| Report                | NA                                                                                                       | Country       | Saudi Arabia                                                                                                                                                                                                                                                                                                                   | 01/1996 to 12/2001  | Ministry of Health (Saudi Arabia). Saudi Arabia Health Statistical Yearbook 2001. Riyadh, Saudi Arabia: Ministry of Health (Saudi Arabia).                                                                                                                                                                                                                                       |
| Report                | NA                                                                                                       | Country       | Saudi Arabia                                                                                                                                                                                                                                                                                                                   | Jan-02              | Ministry of Health (Saudi Arabia). Saudi Arabia Health Statistical Yearbook 2002. Riyadh, Saudi Arabia: Ministry of Health (Saudi Arabia).                                                                                                                                                                                                                                       |
| Report                | NA                                                                                                       | Country       | Saudi Arabia                                                                                                                                                                                                                                                                                                                   | Jan-06              | Ministry of Health (Saudi Arabia). Saudi Arabia Health Statistical Yearbook 2006. Riyadh, Saudi Arabia: Ministry of Health (Saudi Arabia).                                                                                                                                                                                                                                       |
| Report                | NA                                                                                                       | Country       | Saudi Arabia                                                                                                                                                                                                                                                                                                                   | Jan-07              | Ministry of Health (Saudi Arabia). Saudi Arabia Health Statistical Yearbook 2007. Riyadh, Saudi Arabia: Ministry of Health (Saudi Arabia).                                                                                                                                                                                                                                       |
| Report                | NA                                                                                                       | Country       | Saudi Arabia                                                                                                                                                                                                                                                                                                                   | Jan-08              | Ministry of Health (Saudi Arabia). Saudi Arabia Health Statistical Yearbook 2008. Riyadh, Saudi Arabia: Ministry of Health (Saudi Arabia).                                                                                                                                                                                                                                       |
| Report                | Discharge, Emergency, Inpatient, Outpatient                                                              | Country       | Saudi Arabia                                                                                                                                                                                                                                                                                                                   | 01/2006 to 12/2010  | Ministry of Health (Saudi Arabia). Saudi Arabia Health Statistical Yearbook 2010. Riyadh, Saudi Arabia: Ministry of Health (Saudi Arabia).                                                                                                                                                                                                                                       |
| Report                | Discharge, Emergency, Inpatient, Outpatient                                                              | Country       | Saudi Arabia                                                                                                                                                                                                                                                                                                                   | 01/2007 to 12/2011  | Ministry of Health (Saudi Arabia). Saudi Arabia Health Statistical Yearbook 2011. Riyadh, Saudi Arabia: Ministry of Health (Saudi Arabia).                                                                                                                                                                                                                                       |
| Report                | Discharge, Emergency, Inpatient, Outpatient                                                              | Country       | Saudi Arabia                                                                                                                                                                                                                                                                                                                   | 01/2008 to 12/2012  | Ministry of Health (Saudi Arabia). Saudi Arabia Health Statistical Yearbook 2012. Riyadh, Saudi Arabia: Ministry of Health (Saudi Arabia).                                                                                                                                                                                                                                       |
| Report                | NA                                                                                                       | Country       | Saudi Arabia                                                                                                                                                                                                                                                                                                                   | 01/2007 to 12/2013  | Ministry of Health (Saudi Arabia). Saudi Arabia Health Statistical Yearbook 2013. Riyadh, Saudi Arabia: Ministry of Health (Saudi Arabia).                                                                                                                                                                                                                                       |
| Report                | NA                                                                                                       | Country       | Saudi Arabia                                                                                                                                                                                                                                                                                                                   | 01/2005 to 12/2014  | Ministry of Health (Saudi Arabia). Saudi Arabia Health Statistical Yearbook 2014. Riyadh, Saudi Arabia: Ministry of Health (Saudi Arabia).                                                                                                                                                                                                                                       |

| Data type             | Secondary data type                                                                                         | Coverage type | Geography                                                                                                                                                                                                                                                                                                                                                                                                                                                                                                                                                        | Time period covered | Suggested citation                                                                                                                                                                                                                                                    |
|-----------------------|-------------------------------------------------------------------------------------------------------------|---------------|------------------------------------------------------------------------------------------------------------------------------------------------------------------------------------------------------------------------------------------------------------------------------------------------------------------------------------------------------------------------------------------------------------------------------------------------------------------------------------------------------------------------------------------------------------------|---------------------|-----------------------------------------------------------------------------------------------------------------------------------------------------------------------------------------------------------------------------------------------------------------------|
| Report                | Epi surveillance, Subnationally representative                                                              | Country       | Saudi Arabia                                                                                                                                                                                                                                                                                                                                                                                                                                                                                                                                                     | 01/2006 to 12/2015  | Ministry of Health (Saudi Arabia). Saudi Arabia Health Statistical Yearbook 2015. Riyadh, Saudi Arabia: Ministry of Health (Saudi Arabia).                                                                                                                            |
| Report                | Epi surveillance, Subnationally representative                                                              | Country       | Saudi Arabia                                                                                                                                                                                                                                                                                                                                                                                                                                                                                                                                                     | 01/2007 to 12/2016  | Ministry of Health (Saudi Arabia). Saudi Arabia Health Statistical Yearbook 2016. Riyadh, Saudi Arabia: Ministry of Health (Saudi Arabia).                                                                                                                            |
| Report                | Epi surveillance, Subnationally representative                                                              | Country       | Saudi Arabia                                                                                                                                                                                                                                                                                                                                                                                                                                                                                                                                                     | 01/2013 to 12/2017  | Ministry of Health (Saudi Arabia). Saudi Arabia Health Statistical Yearbook 2017. Riyadh, Saudi Arabia: Ministry of Health (Saudi Arabia).                                                                                                                            |
| Report                | Epi surveillance, Subnationally representative                                                              | Country       | Saudi Arabia                                                                                                                                                                                                                                                                                                                                                                                                                                                                                                                                                     | 01/2014 to 12/2018  | Ministry of Health (Saudi Arabia). Saudi Arabia Health Statistical Yearbook 2018. Riyadh, Saudi Arabia: Ministry of Health (Saudi Arabia).                                                                                                                            |
| Survey                | NA                                                                                                          | Country       | Saudi Arabia                                                                                                                                                                                                                                                                                                                                                                                                                                                                                                                                                     | 01/2011 to 12/2012  | King Abdulaziz City for Science and Technology (KACST), King Abdullah International Medical Research Center, Ministry of Education (Saudi Arabia). Saudi Arabia National Assessment of the Health Needs of Adolescents 2011-2012.                                     |
| Survey                | Health facility, Longitudinal                                                                               | Subnational   | Saudi Arabia                                                                                                                                                                                                                                                                                                                                                                                                                                                                                                                                                     | 01/2012 to 01/2015  | Hamilton Health Sciences, McMaster University (Canada), Population Health Research Institute (PHRI). Saudi Arabia Prospective Urban and Rural Epidemiological Study.                                                                                                  |
| Survey                | Cross-sectional, Household, Individual, Interview, Nationally representative                                | Country       | Saudi Arabia                                                                                                                                                                                                                                                                                                                                                                                                                                                                                                                                                     | 08/2004 to 12/2005  | Ministry of Health (Saudi Arabia), World Health Organization (WHO). Saudi Arabia STEPS Noncommunicable Disease Risk Factors Survey 2004-2005.                                                                                                                         |
| Scientific literature | NA                                                                                                          | NA            | Saudi Arabia                                                                                                                                                                                                                                                                                                                                                                                                                                                                                                                                                     | 01/2011 to 12/2011  | Elsharawy MA, Hassan K, Alawad N, Kredees A, Almulhim A. Screening of diabetic foot in surgical inpatients: a hospital-based study in Saudi Arabia. <i>Int J Angiol.</i> 2012; 21(4): 213-6.                                                                          |
| Scientific literature | NA                                                                                                          | NA            | Saudi Arabia                                                                                                                                                                                                                                                                                                                                                                                                                                                                                                                                                     | 01/1991 to 12/1993  | El-Hazmi MA, Al-Swailem A, Warsy AS, Al-Sudairy F, Sulaimani R, Al-Swailem A, Al-Meshari A. The prevalence of diabetes mellitus and impaired glucose tolerance in the population of Riyadh. <i>Ann Saudi Med.</i> 1995; 15(6): 598-601.                               |
| Scientific literature | NA                                                                                                          | NA            | Saudi Arabia                                                                                                                                                                                                                                                                                                                                                                                                                                                                                                                                                     | 01/2007 to 12/2009  | Al-Rubeaan K, Al-Manaa H, Khoja T, Ahmad N, Al-Sharqawi A, Siddiqui K, AlNaqeb D, Aburisheh K, Youssef A, Al-Batil A, Al-Otaibi M, Ghamdi AA. The Saudi Abnormal Glucose Metabolism and Diabetes Impact Study (SAUDI-DM). <i>Ann Saudi Med.</i> 2014; 34(6): 465-475. |
| Scientific literature | NA                                                                                                          | NA            | Sudan                                                                                                                                                                                                                                                                                                                                                                                                                                                                                                                                                            | 01/1986 to 12/1986  | Elmahdi EM, Kaballo AM, Mukhtar EA. Features of non-insulin-dependent diabetes mellitus (NIDDM) in the Sudan. <i>Diabetes Res Clin Pract.</i> 1991; 11(1): 59-63.                                                                                                     |
| Scientific literature | NA                                                                                                          | NA            | Sudan                                                                                                                                                                                                                                                                                                                                                                                                                                                                                                                                                            | 01/1991 to 12/1995  | Elamin A, Ghalib M, Eltayeb B, Tuvemo T. High incidence of type 1 diabetes mellitus in Sudanese children, 1991-1995. <i>Ann Saudi Med.</i> 1997; 17(4): 478-80.                                                                                                       |
| Scientific literature | NA                                                                                                          | NA            | Algeria, Argentina, Australia, Austria, Barbados, Belgium, Brazil, Bulgaria, Canada, Chile, China, Colombia, Cuba, Denmark, Dominica, Estonia, Finland, France, Germany, Greece, Hungary, Israel, Italy, Japan, Kuwait, Latvia, Lithuania, Luxembourg, Mauritius, Mexico, Netherlands, New Zealand, Norway, Pakistan, Paraguay, Peru, Poland, Portugal, Romania, Russian Federation, Slovakia, Slovenia, Spain, Sudan, Tunisia, United Kingdom, United States of America, Puerto Rico, United States Virgin Islands, Uruguay, Venezuela (Bolivarian Republic of) | 01/2000 to 12/2000  | Karvonen M, Viik-Kajander M, Moltchanova E, Libman I, LaPorte R, Tuomilehto J. Incidence of childhood type 1 diabetes worldwide. <i>Diabetes Mondiale (DiaMond) Project Group.</i> <i>Diabetes Care.</i> 2000; 23(10): 1516-1526.                                     |
| Scientific literature | NA                                                                                                          | NA            | Sudan                                                                                                                                                                                                                                                                                                                                                                                                                                                                                                                                                            | 01/1986 to 12/1986  | el Mahdi EM, Abdel Rahman Iel M, Mukhtar Sel D. Pattern of diabetes mellitus in the Sudan. <i>Trop Geogr Med.</i> 1989; 41(4): 353-7.                                                                                                                                 |
| Scientific literature | NA                                                                                                          | NA            | Sudan                                                                                                                                                                                                                                                                                                                                                                                                                                                                                                                                                            | 01/1992 to 12/1992  | Elbagir MN, Eltom MA, Mahadi EO, Berne C. Pattern of long-term complications in Sudanese insulin-treated diabetic patients. <i>Diabetes Res Clin Pract.</i> 1995; 30(1): 59-67.                                                                                       |
| Survey                | Household                                                                                                   | Subnational   | Sudan, Khartoum                                                                                                                                                                                                                                                                                                                                                                                                                                                                                                                                                  | 12/2005 to 01/2006  | Federal Ministry of Health (Sudan), World Health Organization (WHO). Sudan - Khartoum STEPS Noncommunicable Disease Risk Factors Survey 2005-2006.                                                                                                                    |
| Report                | Discharge, Epi surveillance, Inpatient, Nationally representative, Outpatient, Subnationally representative | Country       | Sudan, Sudan [Historical]                                                                                                                                                                                                                                                                                                                                                                                                                                                                                                                                        | 01/2007 to 12/2011  | Federal Ministry of Health (Sudan). Sudan Annual Health Statistics Report 2011. Khartoum, Sudan: Federal Ministry of Health (Sudan), 2012.                                                                                                                            |



| Data type             | Secondary data type | Coverage type | Geography                                                                                                                                                                                                                                                                                                                                                                                                                  | Time period covered | Suggested citation                                                                                                                                                                                                                                        |
|-----------------------|---------------------|---------------|----------------------------------------------------------------------------------------------------------------------------------------------------------------------------------------------------------------------------------------------------------------------------------------------------------------------------------------------------------------------------------------------------------------------------|---------------------|-----------------------------------------------------------------------------------------------------------------------------------------------------------------------------------------------------------------------------------------------------------|
| Scientific literature | NA                  | NA            | Tunisia                                                                                                                                                                                                                                                                                                                                                                                                                    | 01/1990 to 12/1994  | Ben Khalifa F, Mekaouar A, Taktak S, Hamhoum M, Jebara H, Kodja A, Zouari B, Chakroun M. A five-year study of the incidence of insulin-dependent diabetes mellitus in young Tunisians (preliminary results). <i>Diabetes Metab.</i> 1997; 23(5): 395-401. |
| Scientific literature | NA                  | NA            | Tunisia                                                                                                                                                                                                                                                                                                                                                                                                                    | 01/1981 to 12/1981  | Papoz L, Ben Khalifa F, Eschwege E, Ben Ayed H. Diabetes mellitus in Tunisia: description in urban and rural populations. <i>Int J Epidemiol.</i> 1988; 17(2): 419-22.                                                                                    |
| Disease registry      | NA                  | Country       | Albania, Austria, Belgium, Bosnia and Herzegovina, Bulgaria, Croatia, Cyprus, Czechia, Denmark, Estonia, Finland, France, Georgia, Greece, Iceland, Israel, Latvia, Lithuania, Macedonia, Montenegro, Netherlands, Norway, Poland, Portugal, Romania, Serbia, Slovakia, Slovenia, Spain, Sweden, Tunisia, Sfax, Turkiye, Ukraine, United Kingdom, England, Northern Ireland, Scotland, Wales                               | 01/2014 to 12/2014  | European Renal Association-European Dialysis and Transplant Association (ERA-EDTA). ERA-EDTA Registry Annual Report 2014. Amsterdam, Netherlands: Department of Medical Informatics, Academic Medical Center (The Netherlands), 2016.                     |
| Disease registry      | NA                  | Country       | Albania, Austria, Belarus, Belgium, Bosnia and Herzegovina, Bulgaria, Croatia, Cyprus, Czechia, Denmark, Estonia, Finland, France, Georgia, Greece, Iceland, Israel, Latvia, Lithuania, Macedonia, Netherlands, Norway, Poland, Portugal, Romania, Russian Federation, Serbia, Slovakia, Slovenia, Spain, Sweden, Switzerland, Tunisia, Sfax, Turkiye, Ukraine, United Kingdom, England, Northern Ireland, Scotland, Wales | 01/2015 to 12/2015  | European Renal Association-European Dialysis and Transplant Association (ERA-EDTA). ERA-EDTA Registry Annual Report 2015. Amsterdam, Netherlands: Department of Medical Informatics, Academic Medical Center (The Netherlands), 2016.                     |
| Disease registry      | NA                  | Country       | Albania, Austria, Belarus, Belgium, Bosnia and Herzegovina, Bulgaria, Croatia, Cyprus, Czechia, Denmark, Estonia, Finland, France, Georgia, Greece, Iceland, Israel, Italy, Latvia, Lithuania, Macedonia, Norway, Poland, Portugal, Romania, Russian Federation, Serbia, Slovakia, Spain, Sweden, Switzerland, Tunisia, Sfax, Turkiye, Ukraine, United Kingdom, England, Northern Ireland, Scotland, Wales                 | 01/2016 to 12/2016  | European Renal Association-European Dialysis and Transplant Association (ERA-EDTA). ERA-EDTA Registry Annual Report 2016. Amsterdam, Netherlands: Department of Medical Informatics, Academic Medical Center (The Netherlands), 2016.                     |

| Data type             | Secondary data type | Coverage type | Geography                                                                                                                                                                                                                                                                                                                                                                                                                                                                                                                                                        | Time period covered | Suggested citation                                                                                                                                                                                                                                                                                                         |
|-----------------------|---------------------|---------------|------------------------------------------------------------------------------------------------------------------------------------------------------------------------------------------------------------------------------------------------------------------------------------------------------------------------------------------------------------------------------------------------------------------------------------------------------------------------------------------------------------------------------------------------------------------|---------------------|----------------------------------------------------------------------------------------------------------------------------------------------------------------------------------------------------------------------------------------------------------------------------------------------------------------------------|
| Disease registry      | NA                  | Country       | Albania, Austria, Belarus, Belgium, Bosnia and Herzegovina, Bulgaria, Croatia, Cyprus, Czechia, Denmark, Estonia, Finland, France, Georgia, Greece, Iceland, Israel, Italy, Latvia, Lithuania, North Macedonia, Norway, Poland, Portugal, Romania, Russian Federation, Serbia, Slovakia, Spain, Sweden, Switzerland, Tunisia, Sfax, Turkiye, Ukraine, United Kingdom, England, Northern Ireland, Scotland, Wales                                                                                                                                                 | 01/2017 to 12/2017  | European Renal Association-European Dialysis and Transplant Association (ERA-EDTA). ERA-EDTA Registry Annual Report 2017. Amsterdam, Netherlands: Department of Medical Informatics, Academic Medical Center (The Netherlands), 2019.                                                                                      |
| Scientific literature | NA                  | NA            | Tunisia                                                                                                                                                                                                                                                                                                                                                                                                                                                                                                                                                          | 01/2001 to 12/2001  | Ben Romdhane H, Skhiri H, Bougateg S, Ennigrou S, Gharbi D, Chahed MK, Achour N. Hypertension prevalence, awareness, treatment and control: results from a community based survey. <i>Tunis Med.</i> 2005; 83(Suppl 5): 41-6.                                                                                              |
| Scientific literature | NA                  | NA            | Algeria, Argentina, Australia, Austria, Barbados, Belgium, Brazil, Bulgaria, Canada, Chile, China, Colombia, Cuba, Denmark, Dominica, Estonia, Finland, France, Germany, Greece, Hungary, Israel, Italy, Japan, Kuwait, Latvia, Lithuania, Luxembourg, Mauritius, Mexico, Netherlands, New Zealand, Norway, Pakistan, Paraguay, Peru, Poland, Portugal, Romania, Russian Federation, Slovakia, Slovenia, Spain, Sudan, Tunisia, United Kingdom, United States of America, Puerto Rico, United States Virgin Islands, Uruguay, Venezuela (Bolivarian Republic of) | 01/2000 to 12/2000  | Karvonen M, Viik-Kajander M, Moltchanova E, Libman I, LaPorte R, Tuomilehto J. Incidence of childhood type 1 diabetes worldwide. <i>Diabetes Mondiale (DiaMond) Project Group. Diabetes Care.</i> 2000; 23(10): 1516-26.                                                                                                   |
| Scientific literature | NA                  | NA            | Tunisia                                                                                                                                                                                                                                                                                                                                                                                                                                                                                                                                                          | 01/2004 to 12/2005  | Allal-Elasmi M, Feki M, Zayani Y, Hsairi M, Haj Taieb S, Jemaa R, Sanhaji H, Omar S, Mebazaa A, Kaabachi N. Prehypertension among adults in Great Tunis region (Tunisia): A population-based study. <i>Pathol Biol.</i> 2012; 60(3): 174-9.                                                                                |
| Scientific literature | NA                  | NA            | Tunisia                                                                                                                                                                                                                                                                                                                                                                                                                                                                                                                                                          | 01/2007 to 12/2011  | Kahloun R, Jelliti B, Zaouali S, Attia S, Ben Yahia S, Resnikoff S, Khairallah M. Prevalence and causes of visual impairment in diabetic patients in Tunisia, North Africa. <i>Eye (Lond).</i> 2014; 28(8): 986-91.                                                                                                        |
| Scientific literature | NA                  | NA            | Tunisia                                                                                                                                                                                                                                                                                                                                                                                                                                                                                                                                                          | 01/2004 to 12/2005  | Belfki H, Ben Ali S, Aounallah-Skhiri H, Traissac P, Bougateg S, Maire B, Delpuech F, Achour N, Ben Romdhane H. Prevalence and determinants of the metabolic syndrome among Tunisian adults: results of the Transition and Health Impact in North Africa (TAHINA) project. <i>Public Health Nutr.</i> 2013; 16(4): 582-90. |
| Scientific literature | NA                  | NA            | Tunisia                                                                                                                                                                                                                                                                                                                                                                                                                                                                                                                                                          | 01/1990 to 12/1990  | Gharbi M, Akrouf M, Zouari B. Prevalence and risk factors of non-insulin-dependent diabetes mellitus in the rural and urban population of Tunisia. <i>Rev Epidemiol Sante Publique.</i> 2002; 50(4): 349-55.                                                                                                               |
| Scientific literature | NA                  | Country       | Algeria, Argentina, Bahrain, Bangladesh, China, Egypt, India, Indonesia, Iran (Islamic Republic of), Jordan, Kuwait, Libya, Malaysia, Mexico, Morocco, Pakistan, Philippines, Qatar, Russian Federation, Saudi Arabia, Singapore, Republic of Korea, Taiwan (Province of China), Tunisia, Turkiye, United Arab Emirates, Yemen                                                                                                                                                                                                                                   | 01/2009 to 12/2010  | Litwak L, Goh SY, Hussein Z, Malek R, Prusty V, Khamseh ME. Prevalence of diabetes complications in people in type 2 diabetes mellitus and its association with baseline characteristics in the multinational A1chieve study. <i>Diabetol Metab Syndr.</i> 2013; 5(1): 57.                                                 |

| Data type             | Secondary data type                                                                                                 | Coverage type | Geography                                                                                                                                                                                                                                                                                                                                                                                                                                                                | Time period covered | Suggested citation                                                                                                                                                                                                                                                                                        |
|-----------------------|---------------------------------------------------------------------------------------------------------------------|---------------|--------------------------------------------------------------------------------------------------------------------------------------------------------------------------------------------------------------------------------------------------------------------------------------------------------------------------------------------------------------------------------------------------------------------------------------------------------------------------|---------------------|-----------------------------------------------------------------------------------------------------------------------------------------------------------------------------------------------------------------------------------------------------------------------------------------------------------|
| Scientific literature | NA                                                                                                                  | NA            | Tunisia                                                                                                                                                                                                                                                                                                                                                                                                                                                                  | 01/2005 to 12/2005  | Ben Romdhane H, Ben Ali S, Aissi W, Traissac P, Aounallah-Skhiri H, Bougatef S, Maire B, Delpuch F, Achour N. Prevalence of diabetes in Northern African countries: the case of Tunisia. <i>BMC Public Health</i> . 2014; 86.                                                                             |
| Scientific literature | NA                                                                                                                  | NA            | Tunisia                                                                                                                                                                                                                                                                                                                                                                                                                                                                  | 01/2008 to 12/2009  | Hammami S, Mehri S, Hajem S, Koubaa N, Souid H, Hammami M. Prevalence of diabetes mellitus among non institutionalized elderly in Monastir City. <i>BMC Endocr Disord</i> . 2012; 15.                                                                                                                     |
| Scientific literature | NA                                                                                                                  | NA            | Tunisia                                                                                                                                                                                                                                                                                                                                                                                                                                                                  | 01/1997 to 12/1997  | Bouguerra R, Alberti H, Salem LB, Rayana CB, Atti JE, Gaigi S, Slama CB, Zouari B, Alberti K. The global diabetes pandemic: the Tunisian experience. <i>Eur J Clin Nutr</i> . 2007; 61(2): 160-5.                                                                                                         |
| Scientific literature | NA                                                                                                                  | NA            | Tunisia                                                                                                                                                                                                                                                                                                                                                                                                                                                                  | 01/2005 to 12/2005  | Allal-Elasmi M, Haj Taieb S, Hsairi M, Zayani Y, Omar S, Sanhaji H, Jemaa R, Feki M, Elati J, Mebazaa A, Kaabachi N. The metabolic syndrome: prevalence, main characteristics and association with socio-economic status in adults living in Great Tunis. <i>Diabetes Metab</i> . 2010; 36(3): 204-8.     |
| Survey                | Health facility, Household, Individual, Interview, Nationally representative, Urban-rural representative            | Country       | Tunisia                                                                                                                                                                                                                                                                                                                                                                                                                                                                  | 06/2001 to 08/2001  | League of Arab States, National Office for Family and Population, Ministry of Public Health (Tunisia), Pan Arab Project for Family Health (PAPFAM). Tunisia Family Health Survey 2001.                                                                                                                    |
| Disease registry      | NA                                                                                                                  | Country       | Tunisia                                                                                                                                                                                                                                                                                                                                                                                                                                                                  | 01/2014 to 12/2014  | Tunisia Renal Replacement Therapy Data 2014 - ERA-EDTA                                                                                                                                                                                                                                                    |
| Survey                | Cross-sectional, GPS coordinates (GIS), Household, Individual, Interview, Nationally representative, Verbal autopsy | Country       | Tunisia                                                                                                                                                                                                                                                                                                                                                                                                                                                                  | 03/2003 to 09/2003  | World Health Organization (WHO). Tunisia World Health Survey 2003. Geneva, Switzerland: World Health Organization (WHO), 2005.                                                                                                                                                                            |
| Scientific literature | NA                                                                                                                  | NA            | Turkiye                                                                                                                                                                                                                                                                                                                                                                                                                                                                  | 01/2015 to 12/2017  | Emral R, Tetiker T, Sahin I, Sari R, Kaya A, Yetkin F, Cil SU, Tivinc NB, IO HAT investigator group. An international survey on hypoglycemia among insulin-treated type I and type II diabetes patients: Turkey cohort of the non-interventional IO HAT study. <i>BMC Endocr Disord</i> . 2018; 18(1): 9. |
| Scientific literature | NA                                                                                                                  | NA            | Argentina, Australia, Austria, Belarus, Bermuda, Brazil, Canada, Chile, China, Colombia, Croatia, Democratic People's Republic of Korea, Denmark, Estonia, Finland, France, Germany, Hungary, India, Ireland, Israel, Italy, Latvia, Lithuania, Mexico, Netherlands, Norway, Philippines, Poland, Romania, Russian Federation, Slovakia, South Africa, Spain, Sweden, Switzerland, Turkiye, United Kingdom, United States of America, Venezuela (Bolivarian Republic of) | 01/2000 to 12/2010  | ORIGIN Trial Investigators, Gerstein HC, Bosch J, Dagenais GR, Diaz R, Jung H, Maggioni AP, Pogue J, Probstfield J, Ramachandran A, Riddle MC, Rydén LE, Yusuf S. Basal insulin and cardiovascular and other outcomes in dysglycemia. <i>N Engl J Med</i> . 2012; 367(4): 319-28.                         |
| Scientific literature | NA                                                                                                                  | NA            | Turkiye                                                                                                                                                                                                                                                                                                                                                                                                                                                                  | 01/2001 to 12/2001  | Sekuri C, Eser E, Akpınar G, Cakir H, Sitti I, Gulomur O, Ozcan C. Cardiovascular disease risk factors in post-menopausal women in West Anatolia. <i>Jpn Heart J</i> . 2004; 45(1): 119-31.                                                                                                               |
| Scientific literature | NA                                                                                                                  | Country       | Austria, Canada, Chile, Denmark, Germany, Italy, Japan, Netherlands, Republic of Korea, Sweden, Taiwan (Province of China), Thailand, Turkiye, United States of America                                                                                                                                                                                                                                                                                                  | 01/1974 to 12/2011  | Boyle P, Boniol M, Koechlin A, Robertson C, Valentini F, Coppens K, Fairley LL, Boniol M, Zheng T, Zhang Y, Pasterk M, Smans M, Curado MP, Mullie P, Gandini S, Bota M, Bolli GB, Rosenstock J, Autier P. Diabetes and breast cancer risk: a meta-analysis. <i>Br J Cancer</i> . 2012; 107(9): 1608-17.   |
| Scientific literature | NA                                                                                                                  | NA            | Austria, Canada, Israel, Italy, Japan, Norway, Sweden, Switzerland, Taiwan (Province of China), Turkiye, United Kingdom, United States of America                                                                                                                                                                                                                                                                                                                        | 01/1985 to 12/2012  | Lee JY1, Jeon I, Kim JW, Song YS, Yoon JM, Park SM. Diabetes mellitus and ovarian cancer risk: a systematic review and meta-analysis of observational studies. <i>Int J Gynaecol Obstet</i> . 2013; 23(3): 402-12.                                                                                        |

| Data type        | Secondary data type | Coverage type | Geography                                                                                                                                                                                                                                                                                                                                                                                                                  | Time period covered | Suggested citation                                                                                                                                                                                                                    |
|------------------|---------------------|---------------|----------------------------------------------------------------------------------------------------------------------------------------------------------------------------------------------------------------------------------------------------------------------------------------------------------------------------------------------------------------------------------------------------------------------------|---------------------|---------------------------------------------------------------------------------------------------------------------------------------------------------------------------------------------------------------------------------------|
| Disease registry | NA                  | Country       | Albania, Austria, Belgium, Bosnia and Herzegovina, Bulgaria, Croatia, Cyprus, Czechia, Denmark, Estonia, Finland, France, Georgia, Greece, Iceland, Israel, Latvia, Lithuania, Montenegro, Netherlands, Norway, Poland, Portugal, Romania, Russian Federation, Serbia, Slovakia, Slovenia, Spain, Sweden, Switzerland, Turkiye, Ukraine, United Kingdom, England, Northern Ireland, Scotland, Wales                        | 01/2013 to 12/2013  | European Renal Association-European Dialysis and Transplant Association (ERA-EDTA). ERA-EDTA Registry Annual Report 2013. Amsterdam, Netherlands: Department of Medical Informatics, Academic Medical Center (The Netherlands), 2015. |
| Disease registry | NA                  | Country       | Albania, Austria, Belgium, Bosnia and Herzegovina, Bulgaria, Croatia, Cyprus, Czechia, Denmark, Estonia, Finland, France, Georgia, Greece, Iceland, Israel, Latvia, Lithuania, Macedonia, Montenegro, Netherlands, Norway, Poland, Portugal, Romania, Serbia, Slovakia, Slovenia, Spain, Sweden, Tunisia, Sfax, Turkiye, Ukraine, United Kingdom, England, Northern Ireland, Scotland, Wales                               | 01/2014 to 12/2014  | European Renal Association-European Dialysis and Transplant Association (ERA-EDTA). ERA-EDTA Registry Annual Report 2014. Amsterdam, Netherlands: Department of Medical Informatics, Academic Medical Center (The Netherlands), 2016. |
| Disease registry | NA                  | Country       | Albania, Austria, Belarus, Belgium, Bosnia and Herzegovina, Bulgaria, Croatia, Cyprus, Czechia, Denmark, Estonia, Finland, France, Georgia, Greece, Iceland, Israel, Latvia, Lithuania, Macedonia, Netherlands, Norway, Poland, Portugal, Romania, Russian Federation, Serbia, Slovakia, Slovenia, Spain, Sweden, Switzerland, Tunisia, Sfax, Turkiye, Ukraine, United Kingdom, England, Northern Ireland, Scotland, Wales | 01/2015 to 12/2015  | European Renal Association-European Dialysis and Transplant Association (ERA-EDTA). ERA-EDTA Registry Annual Report 2015. Amsterdam, Netherlands: Department of Medical Informatics, Academic Medical Center (The Netherlands), 2016. |
| Disease registry | NA                  | Country       | Albania, Austria, Belarus, Belgium, Bosnia and Herzegovina, Bulgaria, Croatia, Cyprus, Czechia, Denmark, Estonia, Finland, France, Georgia, Greece, Iceland, Israel, Italy, Latvia, Lithuania, Macedonia, Norway, Poland, Portugal, Romania, Russian Federation, Serbia, Slovakia, Spain, Sweden, Switzerland, Tunisia, Sfax, Turkiye, Ukraine, United Kingdom, England, Northern Ireland, Scotland, Wales                 | 01/2016 to 12/2016  | European Renal Association-European Dialysis and Transplant Association (ERA-EDTA). ERA-EDTA Registry Annual Report 2016. Amsterdam, Netherlands: Department of Medical Informatics, Academic Medical Center (The Netherlands), 2016. |

| Data type             | Secondary data type | Coverage type | Geography                                                                                                                                                                                                                                                                                                                                                                                                        | Time period covered | Suggested citation                                                                                                                                                                                                                                                                                                                                            |
|-----------------------|---------------------|---------------|------------------------------------------------------------------------------------------------------------------------------------------------------------------------------------------------------------------------------------------------------------------------------------------------------------------------------------------------------------------------------------------------------------------|---------------------|---------------------------------------------------------------------------------------------------------------------------------------------------------------------------------------------------------------------------------------------------------------------------------------------------------------------------------------------------------------|
| Disease registry      | NA                  | Country       | Albania, Austria, Belarus, Belgium, Bosnia and Herzegovina, Bulgaria, Croatia, Cyprus, Czechia, Denmark, Estonia, Finland, France, Georgia, Greece, Iceland, Israel, Italy, Latvia, Lithuania, North Macedonia, Norway, Poland, Portugal, Romania, Russian Federation, Serbia, Slovakia, Spain, Sweden, Switzerland, Tunisia, Sfax, Turkiye, Ukraine, United Kingdom, England, Northern Ireland, Scotland, Wales | 01/2017 to 12/2017  | European Renal Association-European Dialysis and Transplant Association (ERA-EDTA). ERA-EDTA Registry Annual Report 2017. Amsterdam, Netherlands: Department of Medical Informatics, Academic Medical Center (The Netherlands), 2019.                                                                                                                         |
| Scientific literature | NA                  | NA            | Turkiye                                                                                                                                                                                                                                                                                                                                                                                                          | 01/1997 to 12/2010  | Onat A, Can G, Váivek G, Ayhan E, Douan Y, Kaya H. Fasting, non-fasting glucose and HDL dysfunction in risk of pre-diabetes, diabetes, and coronary disease in non-diabetic adults. <i>Acta Diabetol.</i> 2013; 50(4): 519-28.                                                                                                                              |
| Scientific literature | NA                  | NA            | Turkiye                                                                                                                                                                                                                                                                                                                                                                                                          | 01/2007 to 12/2009  | Unal B, Sozmen K, Ucku R, Ergor G, Soysal A, Baydur H, Meseri R, Simsek H, Gerçeklioglu G, Doganay S, Budak R, Kilic B, Gunay T, Ergor A, Demiral Y, Aslan O, Cimrin D, Akvardar Y, Tuncel P. High prevalence of cardiovascular risk factors in a Western urban Turkish population: a community-based study. <i>Anadolu Kardiyol Derg.</i> 2013; 13(1): 9-17. |
| Scientific literature | NA                  | NA            | Turkiye                                                                                                                                                                                                                                                                                                                                                                                                          | 01/2003 to 12/2003  | Gokcel A, Ozsahin AK, Sezgin N, Karakose H, Ertorer ME, Akbaba M, Baklaci N, Sengul A, Guvener N. High prevalence of diabetes in Adana, a southern province of Turkey. <i>Diabetes Care.</i> 2003; 26(11): 3031-4.                                                                                                                                            |
| Scientific literature | NA                  | Country       | Turkiye                                                                                                                                                                                                                                                                                                                                                                                                          | 01/2001 to 12/2001  | Yumuk VD, Hatemi H, Tarakci T, Uyar N, Turan N, Bagriacik N, Ipbuker A. High prevalence of obesity and diabetes mellitus in Konya, a central Anatolian city in Turkey. <i>Diabetes Res Clin Pract.</i> 2005; 70(2): 151-8.                                                                                                                                    |
| Scientific literature | NA                  | NA            | Turkiye                                                                                                                                                                                                                                                                                                                                                                                                          | 01/2005 to 12/2006  | Dogan N, Toprak D, Demir S. Hypertension prevalence and risk factors among adult population in Afyonkarahisar region: a cross-sectional research. <i>Anadolu Kardiyol Derg.</i> 2012; 12(1): 47-52.                                                                                                                                                           |
| Scientific literature | NA                  | NA            | Turkiye                                                                                                                                                                                                                                                                                                                                                                                                          | 01/2006 to 12/2006  | Toprak O, Cirit M, Yesil M, Bayata S, Tanrisev M, Varol U, Ersoy R, Esi E. Impact of diabetic and pre-diabetic state on development of contrast-induced nephropathy in patients with chronic kidney disease. <i>Nephrol Dial Transplant.</i> 2007; 22(3): 819-26.                                                                                             |
| Scientific literature | NA                  | NA            | Turkiye                                                                                                                                                                                                                                                                                                                                                                                                          | 01/2010 to 12/2011  | Demirbilek H, Vzbek MN, Baran RT. Incidence of type 1 diabetes mellitus in Turkish children from the southeastern region of the country: a regional report. <i>J Clin Res Pediatr Endocrinol.</i> 2013; 5(2): 98-103.                                                                                                                                        |
| Scientific literature | NA                  | NA            | Turkiye                                                                                                                                                                                                                                                                                                                                                                                                          | 01/2002 to 12/2012  | Inal A, Kaplan MA, Kucukoner M, Urakc Z, Kflnc F, Isfkdogan A. Is diabetes mellitus a negative prognostic factor for the treatment of advanced non-small-cell lung cancer?. <i>Rev Port Pneumol.</i> 2014; 20(2): 62-8.                                                                                                                                   |
| Scientific literature | NA                  | NA            | Turkiye                                                                                                                                                                                                                                                                                                                                                                                                          | 01/1990 to 12/2007  | Onat A, Hergenc G, Kucukdurmaz Z, Ugur M, Kaya Z, Can G, Yuksel H. Moderate and heavy alcohol consumption among Turks: long-term impact on mortality and cardiometabolic risk. <i>Turk Kardiyol Dern Ars.</i> 2009; 37(2): 83-90.                                                                                                                             |
| Scientific literature | NA                  | NA            | Turkiye                                                                                                                                                                                                                                                                                                                                                                                                          | 01/1998 to 12/1998  | Satman I, Yilmaz T, Sengvl A, Salman S, Salman F, Uygur S, Bastar I, Tvtvncv Y, Sargin M, Dinvag N, Karsidag K, Kalava S, Ozcan C, King H. Population-based study of diabetes and risk characteristics in Turkey: results of the Turkish Diabetes Epidemiology Study (TURDEP). <i>Diabetes Care.</i> 2002; 25(9): 1551-6.                             |
| Scientific literature | NA                  | NA            | Turkiye                                                                                                                                                                                                                                                                                                                                                                                                          | 01/2013 to 12/2014  | Bayindir Cevik A, Metin Karaaslan M, Kocan S, Pekmezci H, Baydur Sahin S, Kirbas A, Ayaz T. Prevalence and screening for risk factors of type 2 diabetes in Rize, Nourtheast Turkey: findings from a population-based study. <i>Prim Care Diabetes.</i> 2015; 10(1): nan.                                                                                     |
| Scientific literature | NA                  | Country       | Algeria, Argentina, Bahrain, Bangladesh, China, Egypt, India, Indonesia, Iran (Islamic Republic of), Jordan, Kuwait, Libya, Malaysia, Mexico, Morocco, Pakistan, Philippines, Qatar, Russian Federation, Saudi Arabia, Singapore, Republic of Korea, Taiwan (Province of China), Tunisia, Turkiye, United Arab Emirates, Yemen                                                                                   | 01/2009 to 12/2010  | Litwak L, Goh SY, Hussein Z, Malek R, Prusty V, Khamseh ME. Prevalence of diabetes complications in people in type 2 diabetes mellitus and its association with baseline characteristics in the multinational A1chieve study . <i>Diabetol Metab Syndr.</i> 2013; 5(1): 57.                                                                                   |
| Scientific literature | NA                  | NA            | Turkiye                                                                                                                                                                                                                                                                                                                                                                                                          | 01/1999 to 12/1999  | Erem C, Yildiz R, Kavgaci H, Karahan C, Deger O, Can G, Telatar M. Prevalence of diabetes, obesity and hypertension in a Turkish population (Trabzon city). <i>Diabetes Res Clin Pract.</i> 2001; 54(3): 203-8.                                                                                                                                               |
| Scientific literature | NA                  | NA            | Turkiye                                                                                                                                                                                                                                                                                                                                                                                                          | 01/2012 to 12/2013  | Bayram F, Kocer D, Gundogan K, Kaya A, Demir O, Coskun R, Sabuncu T, Karaman A, Cesur M, Rizzo M, Toth PP, Gedik V. Prevalence of dyslipidemia and associated risk factors in Turkish adults. <i>J Clin Lipidol.</i> 2014; 8(2): 206-16.                                                                                                                      |

| Data type             | Secondary data type                                                           | Coverage type | Geography                                                                                                                     | Time period covered | Suggested citation                                                                                                                                                                                                                                                                                                 |
|-----------------------|-------------------------------------------------------------------------------|---------------|-------------------------------------------------------------------------------------------------------------------------------|---------------------|--------------------------------------------------------------------------------------------------------------------------------------------------------------------------------------------------------------------------------------------------------------------------------------------------------------------|
| Scientific literature | NA                                                                            | NA            | Turkiye                                                                                                                       | 01/2003 to 12/2005  | Gundogan K, Bayram F, Capak M, Tanriverdi F, Karaman A, Ozturk A, Altunbas H, Gokce C, Kalkan A, Yazici C. Prevalence of metabolic syndrome in the Mediterranean region of Turkey: evaluation of hypertension, diabetes mellitus, obesity, and dyslipidemia. <i>Metab Syndr Relat Disord</i> . 2009; 7(5): 427-34. |
| Scientific literature | NA                                                                            | NA            | Turkiye                                                                                                                       | 01/2000 to 12/2002  | Sanisoglu SY, Oktenli C, Hasimi A, Yokusoglu M, Ugurlu M. Prevalence of metabolic syndrome-related disorders in a large adult population in Turkey. <i>BMC Public Health</i> . 2006; 92.                                                                                                                           |
| Scientific literature | NA                                                                            | NA            | Turkiye                                                                                                                       | 01/2008 to 12/2010  | Erbas T, Ertas M, Yucel A, Keskinaslan A, Senocak M, TURNEP Study Group. Prevalence of peripheral neuropathy and painful peripheral neuropathy in Turkish diabetic patients. <i>J Clin Neurophysiol</i> . 2011; 28(1): 51-5.                                                                                       |
| Scientific literature | NA                                                                            | NA            | Turkiye                                                                                                                       | 01/2009 to 12/2009  | Akesen E, Turan S, Gvran T, Atay Z, Save D, Bereket A. Prevalence of type 1 diabetes mellitus in 6-18-yr-old school children living in Istanbul, Turkey. <i>Pediatr Diabetes</i> . 2011; 12(6): 567-71.                                                                                                            |
| Scientific literature | NA                                                                            | NA            | Turkiye                                                                                                                       | 01/2002 to 12/2003  | Beji NK, Reis N. Risk factors for breast cancer in Turkish women: a hospital-based case-control study. <i>Eur J Cancer Care (Engl)</i> . 2007; 16(2): 178-84.                                                                                                                                                      |
| Scientific literature | NA                                                                            | NA            | Turkiye                                                                                                                       | 01/2002 to 12/2003  | ReiAs N, BejiA NK. Risk Factors for Ovarian Cancer: Results from a Hospital-Based Case-Control Study. <i>Turkiye Klinikleri J Med Sci</i> . 2010; 30(1): 79-87.                                                                                                                                                    |
| Scientific literature | NA                                                                            | NA            | Turkiye                                                                                                                       | 01/1998 to 12/2003  | Maral I, Tvtnvncv NB, Bakar C, Durukan E, Budakofulu II, Ozkan S, Aycan S, Aygvn R, Bumin MA. The 5-year incidence of type 2 diabetes mellitus in women older than 15 years in Ankara, Turkey: a population-based study. <i>J Investig Med</i> . 2010; 58(6): 796-800.                                             |
| Scientific literature | NA                                                                            | Country       | Germany, Japan, Netherlands, Norway, Serbia, Republic of Korea, Taiwan (Province of China), Turkiye, United States of America | 01/1984 to 12/2012  | Zhu L, Cao H, Zhang T, Shen H, Dong W, Wang L, Du J. The effect of diabetes mellitus on lung cancer prognosis: a PRISMA-compliant meta-analysis of cohort studies. <i>Medicine (Baltimore)</i> . 2016; 95(17): :e3528.                                                                                             |
| Scientific literature | NA                                                                            | NA            | Turkiye                                                                                                                       | 01/1990 to 12/1990  | Onat A, Hergenc G, Bulur S, Ugur M, Kucukdurmaz Z, Can G. The paradox of high apolipoprotein A-I levels independently predicting incident type-2 diabetes among Turks. <i>Int J Cardiol</i> . 2010; 142(1): 72-9.                                                                                                  |
| Scientific literature | NA                                                                            | NA            | Turkiye                                                                                                                       | 01/1994 to 12/1994  | Kelestimur F, Cetin M, Pa=uaofulu H, Coksevimi B, Cetinkaya F, Unlvhizarci K, Unal S, Kvoker AH. The prevalence and identification of risk factors for type 2 diabetes mellitus and impaired glucose tolerance in Kayseri, central Anatolia, Turkey. <i>Acta Diabetol</i> . 1999; 36(1-2): 85-91.                  |
| Scientific literature | NA                                                                            | NA            | Turkiye                                                                                                                       | 01/2001 to 12/2002  | Soysal A, Demiral Y, Soysal D, Uvßku R, Kvðseoglu M, Aksakoglu G. The prevalence of metabolic syndrome among young adults in Izmir, Turkey. <i>Anadolu Kardiyol Derg</i> . 2005; 5(3): 196-201.                                                                                                                    |
| Scientific literature | NA                                                                            | NA            | Turkiye                                                                                                                       | 01/2003 to 12/2005  | Tamer A, Yildiz S, Yildiz N, Kanat M, Gunduz H, Tahtaci M, Celebi H. The prevalence of neuropathy and relationship with risk factors in diabetic patients: a single-center experience. <i>Med Princ Pract</i> . 2006; 15(3): 190-4.                                                                                |
| Survey                | Exam, Individual, Nationally representative                                   | Country       | Turkiye                                                                                                                       | 07/2011 to 09/2011  | Ministry of Health (Turkey). Turkey Chronic Diseases and Risk Factors Study 2011.                                                                                                                                                                                                                                  |
| Report                | NA                                                                            | Country       | Turkiye                                                                                                                       | 01/1970 to 12/2007  | Ministry of Health (Turkey). Turkey Health at a Glance 2007. Ankara, Turkey: Ministry of Health (Turkey), 2008.                                                                                                                                                                                                    |
| Survey                | Cross-sectional, Household, Individual, Interview, Urban-rural representative | Country       | Turkiye                                                                                                                       | Apr-08              | Turkish Statistical Institute. Turkey Health Interview Survey 2008. Ankara, Turkey: Turkish Statistical Institute.                                                                                                                                                                                                 |
| Survey                | Cross-sectional, Household, Individual, Interview, Urban-rural representative | Country       | Turkiye                                                                                                                       | May-10              | Turkish Statistical Institute. Turkey Health Interview Survey 2010. Ankara, Turkey: Turkish Statistical Institute.                                                                                                                                                                                                 |
| Report                | NA                                                                            | Country       | Turkiye                                                                                                                       | 01/2009 to 12/2009  | Ministry of Health of Turkey, Turkish Statistical Institute. Turkey Health Statistics Yearbook 2009. Ankara, Turkey                                                                                                                                                                                                |
| Report                | NA                                                                            | Country       | Turkiye                                                                                                                       | 01/2010 to 12/2010  | Ministry of Health of Turkey, Turkish Statistical Institute. Turkey Health Statistics Yearbook 2010. Ankara, Turkey                                                                                                                                                                                                |
| Report                | NA                                                                            | Country       | Turkiye                                                                                                                       | 01/1990 to 12/2011  | Ministry of Health (Turkey). Turkey Health Statistics Yearbook 2011. Ankara, Turkey: Ministry of Health (Turkey), 2012.                                                                                                                                                                                            |
| Report                | Discharge, Epi surveillance, Inpatient, Outpatient                            | Country       | Turkiye                                                                                                                       | 01/2002 to 12/2014  | Ministry of Health (Turkey). Turkey Health Statistics Yearbook 2014. Ankara, Turkey: General Directorate for Health Research (SAGEM) (Turkey), 2015.                                                                                                                                                               |
| Report                | Discharge, Epi surveillance, Inpatient, Outpatient                            | Country       | Turkiye                                                                                                                       | 01/2002 to 12/2015  | Ministry of Health (Turkey). Turkey Health Statistics Yearbook 2015. Ankara, Turkey: General Directorate for Health Research (SAGEM) (Turkey), 2015.                                                                                                                                                               |
| Report                | Discharge, Epi surveillance, Inpatient, Outpatient                            | Country       | Turkiye                                                                                                                       | 01/2002 to 12/2016  | Ministry of Health (Turkey). Turkey Health Statistics Yearbook 2016. Ankara, Turkey: General Directorate for Health Research (SAGEM) (Turkey), 2017.                                                                                                                                                               |
| Report                | Discharge, Epi surveillance, Inpatient, Outpatient                            | Country       | Turkiye                                                                                                                       | 01/2002 to 12/2017  | Ministry of Health (Turkey). Turkey Health Statistics Yearbook 2017. Ankara, Turkey: Ministry of Health (Turkey), 2018.                                                                                                                                                                                            |

| Data type             | Secondary data type                                                                                                 | Coverage type | Geography            | Time period covered | Suggested citation                                                                                                                                                                                                                                                                                             |
|-----------------------|---------------------------------------------------------------------------------------------------------------------|---------------|----------------------|---------------------|----------------------------------------------------------------------------------------------------------------------------------------------------------------------------------------------------------------------------------------------------------------------------------------------------------------|
| Survey                | Cross-sectional, Household, Mortuary, Nationally representative, Urban-rural representative, Verbal autopsy         | Country       | Turkiye              | 06/2005 to 05/2006  | BNB Consulting (Turkey), ICON-INSTITUTE Consulting Group, Institute of Population Studies, Hacettepe University, Ministry of Health (Turkey). Turkey National Maternal Mortality Study 2005-2006.                                                                                                              |
| Survey                | Cross-sectional, Household, Individual, Interview, Nationally representative, Urban-rural representative            | Country       | Turkiye              | 06/2003 to 11/2003  | Omega Contract Research Organization, Turkish Society of Hypertension and Renal Diseases. Turkey Prevalence, Awareness, Treatment and Control of Hypertension Study 2003. Ankara, Turkey: Turkish Society of Hypertension and Renal Diseases.                                                                  |
| Survey                | Longitudinal                                                                                                        | Country       | Turkiye              | Jan-02              | Hamilton Health Sciences, McMaster University (Canada), Population Health Research Institute (PHRI). Turkey Prospective Urban and Rural Epidemiological Study.                                                                                                                                                 |
| Disease registry      | NA                                                                                                                  | Country       | Turkiye              | 01/2014 to 12/2014  | Turkey Registry of Nephrology, Dialysis and Transplantation–Renal Replacement Therapy Data 2014 - ERA-EDTA                                                                                                                                                                                                     |
| Disease registry      | NA                                                                                                                  | Country       | Turkiye              | 01/2015 to 12/2015  | Turkey Registry of Nephrology, Dialysis and Transplantation Renal Replacement Therapy Data 2015 - ERA-EDTA                                                                                                                                                                                                     |
| Disease registry      | NA                                                                                                                  | Country       | Turkiye              | 01/2016 to 12/2016  | Turkey Registry of Nephrology, Dialysis and Transplantation Renal Replacement Therapy Data 2016 - ERA-EDTA.                                                                                                                                                                                                    |
| Disease registry      | NA                                                                                                                  | Country       | Turkiye              | 01/2017 to 12/2017  | Turkey Registry of Nephrology, Dialysis and Transplantation Renal Replacement Therapy Data 2017 - ERA-EDTA.                                                                                                                                                                                                    |
| Survey                | Interview, Nationally representative, Urban-rural representative                                                    | Country       | Turkiye              | 01/2007 to 04/2007  | Omega Contract Research Organization, Turkish Society of Hypertension and Renal Diseases. Turkey Salt Consumption and Blood Pressure Study 2007.                                                                                                                                                               |
| Report                | NA                                                                                                                  | Country       | Turkiye              | 01/1988 to 12/2010  | Turkish Statistical Institute. Turkey Statistical Yearbook 2010. Ankara, Turkey: Turkish Statistical Institute, 2011.                                                                                                                                                                                          |
| Report                | NA                                                                                                                  | Country       | Turkiye              | 01/1998 to 12/2011  | Turkish Statistical Institute. Turkey Statistical Yearbook 2011. Ankara, Turkey: Turkish Statistical Institute, 2012.                                                                                                                                                                                          |
| Survey                | Cross-sectional, Exam, Household, Individual, Interview, Nationally representative                                  | Country       | Turkiye              | 04/2017 to 09/2017  | Ministry of Health (Turkey), World Health Organization (WHO). Turkey STEPS Noncommunicable Disease Risk Factors Survey 2017.                                                                                                                                                                                   |
| Survey                | Cross-sectional, GPS coordinates (GIS), Household, Individual, Interview, Nationally representative, Verbal autopsy | Country       | Turkiye              | 02/2003 to 05/2003  | World Health Organization (WHO). Turkey World Health Survey 2003. Geneva, Switzerland: World Health Organization (WHO), 2005.                                                                                                                                                                                  |
| Disease registry      | NA                                                                                                                  | Country       | Turkiye              | 01/2010 to 12/2010  | Turkish Society of Nephrology (TSN) Registry Renal Replacement Therapy Data 2010 - ERA-EDTA                                                                                                                                                                                                                    |
| Disease registry      | NA                                                                                                                  | Country       | Turkiye              | 01/2011 to 12/2011  | Turkish Society of Nephrology (TSN) Registry Renal Replacement Therapy Data 2011 - ERA-EDTA                                                                                                                                                                                                                    |
| Scientific literature | NA                                                                                                                  | NA            | Turkiye              | 01/2010 to 12/2010  | Satman I, Omer B, Tutuncu Y, Kalaca S, Gedik S, Dincceg N, Karsidag K, Genc S, Telci A, Canbaz B, Turker F, Yilmaz T, Cakir B, Tuomilehto J, TURDEP-II Study Group. Twelve-year trends in the prevalence and risk factors of diabetes and prediabetes in Turkish adults. Eur J Epidemiol. 2013; 28(2): 169-80. |
| Scientific literature | NA                                                                                                                  | NA            | Turkiye              | 01/1955 to 12/1980  | BagriaVfik N, lpbV%ker A. [Incidence of juvenile diabetes and its characteristics in Turkey]. Journ Annu Diabetol Hotel Dieu. 1981; 97-100.                                                                                                                                                                    |
| Scientific literature | NA                                                                                                                  | NA            | United Arab Emirates | 01/2009 to 12/2010  | Hajat C, Harrison O, Al Siksek Z. Diagnostic testing for diabetes using HbA(1c) in the Abu Dhabi population: Weqaya: the Abu Dhabi cardiovascular screening program. Diabetes Care. 2011; 34(11): 2400,Äi2.                                                                                                    |
| Scientific literature | NA                                                                                                                  | NA            | United Arab Emirates | 01/1999 to 12/2000  | Malik M, Bakir A, Saab BA, Roglic G, King H. Glucose intolerance and associated factors in the multi-ethnic population of the United Arab Emirates results of a national survey. Diabetes Res Clin Pract. 2005; 69(2): 188-95.                                                                                 |
| Scientific literature | NA                                                                                                                  | NA            | United Arab Emirates | 01/2012 to 12/2013  | Hamoudi R, Saheb Sharif-Askari N, Saheb Sharif-Askari F, Abusnana S, Aljaibeji H, Taneera J, Sulaiman N. Prediabetes and diabetes prevalence and risk factors comparison between ethnic groups in the United Arab Emirates. Sci Rep. 2019; 9(1): 17437.                                                        |

| Data type             | Secondary data type                                                                                                 | Coverage type | Geography                                                                                                                                                                                                                                                                                                                      | Time period covered | Suggested citation                                                                                                                                                                                                                                                                                                                                              |
|-----------------------|---------------------------------------------------------------------------------------------------------------------|---------------|--------------------------------------------------------------------------------------------------------------------------------------------------------------------------------------------------------------------------------------------------------------------------------------------------------------------------------|---------------------|-----------------------------------------------------------------------------------------------------------------------------------------------------------------------------------------------------------------------------------------------------------------------------------------------------------------------------------------------------------------|
| Scientific literature | NA                                                                                                                  | Country       | Algeria, Argentina, Bahrain, Bangladesh, China, Egypt, India, Indonesia, Iran (Islamic Republic of), Jordan, Kuwait, Libya, Malaysia, Mexico, Morocco, Pakistan, Philippines, Qatar, Russian Federation, Saudi Arabia, Singapore, Republic of Korea, Taiwan (Province of China), Tunisia, Turkiye, United Arab Emirates, Yemen | 01/2009 to 12/2010  | Litwak L, Goh SY, Hussein Z, Malek R, Prusty V, Khamseh ME. Prevalence of diabetes complications in people in type 2 diabetes mellitus and its association with baseline characteristics in the multinational A1chieve study . Diabetol Metab Syndr. 2013; 5(1): 57.                                                                                            |
| Scientific literature | NA                                                                                                                  | NA            | United Arab Emirates                                                                                                                                                                                                                                                                                                           | 01/2006 to 12/2006  | Saadi H, Carruthers SG, Nagelkerke N, Al-Maskari F, Afandi B, Reed R, Lukic M, Nicholls MG, Kazam E, Algawi K, Al-Kaabi J, Leduc C, Sabri S, El-Sadig M, Elkhumaidi S, Agarwal M, Benedict S. Prevalence of diabetes mellitus and its complications in a population-based sample in Al Ain, United Arab Emirates. Diabetes Res Clin Pract. 2007; 78(3): 369-77. |
| Scientific literature | NA                                                                                                                  | NA            | United Arab Emirates                                                                                                                                                                                                                                                                                                           | 01/2003 to 12/2004  | Al-Maskari F, El-Sadig M. Prevalence of diabetic retinopathy in the United Arab Emirates: a cross-sectional survey. BMC Ophthalmol. 2007; 7(1): 11.                                                                                                                                                                                                             |
| Scientific literature | NA                                                                                                                  | NA            | United Arab Emirates                                                                                                                                                                                                                                                                                                           | 01/2003 to 12/2004  | Al-Maskari F, El-Sadig M. Prevalence of risk factors for diabetic foot complications. BMC Fam Pract. 2007; 8(1): 59.                                                                                                                                                                                                                                            |
| Report                | Epi surveillance, Inpatient, Nationally representative, Outpatient                                                  | Subnational   | United Arab Emirates, Abū Zāby                                                                                                                                                                                                                                                                                                 | 01/1985 to 12/2010  | Abu Dhabi General Authority for Health Services. United Arab Emirates - Abu Dhabi Health Statistics 2010. Abu Dhabi, United Arab Emirates: Abu Dhabi General Authority for Health Services, 2011.                                                                                                                                                               |
| Report                | Epi surveillance, Inpatient, Nationally representative, Outpatient                                                  | Subnational   | United Arab Emirates, Abū Zāby                                                                                                                                                                                                                                                                                                 | 01/1985 to 12/2011  | Abu Dhabi General Authority for Health Services. United Arab Emirates - Abu Dhabi Health Statistics 2011. Abu Dhabi, United Arab Emirates: Abu Dhabi General Authority for Health Services, 2012.                                                                                                                                                               |
| Report                | Epi surveillance, Inpatient, Nationally representative, Outpatient                                                  | Subnational   | United Arab Emirates, Abū Zāby                                                                                                                                                                                                                                                                                                 | 01/1985 to 12/2012  | Abu Dhabi General Authority for Health Services. United Arab Emirates - Abu Dhabi Health Statistics 2012. Abu Dhabi, United Arab Emirates: Abu Dhabi General Authority for Health Services, 2013.                                                                                                                                                               |
| Report                | Discharge, Epi surveillance, Inpatient, Outpatient                                                                  | Subnational   | United Arab Emirates, Dubayy                                                                                                                                                                                                                                                                                                   | 01/1995 to 12/2005  | Dubai Department of Health and Medical Services. United Arab Emirates - Dubai Health Statistical Yearbook 2005. Dubai: Dubai Department of Health and Medical Services.                                                                                                                                                                                         |
| Report                | Discharge, Epi surveillance, Inpatient, Outpatient                                                                  | Subnational   | United Arab Emirates, Dubayy                                                                                                                                                                                                                                                                                                   | 01/1996 to 12/2006  | Dubai Department of Health and Medical Services. United Arab Emirates - Dubai Health Statistical Yearbook 2006. Dubai: Dubai Department of Health and Medical Services.                                                                                                                                                                                         |
| Report                | Discharge, Epi surveillance, Inpatient, Outpatient                                                                  | Subnational   | United Arab Emirates, Dubayy                                                                                                                                                                                                                                                                                                   | 01/1997 to 12/2007  | Dubai Department of Health and Medical Services. United Arab Emirates - Dubai Health Statistical Yearbook 2007. Dubai: Dubai Department of Health and Medical Services.                                                                                                                                                                                         |
| Survey                | Household, Individual, Interview                                                                                    | Country       | United Arab Emirates                                                                                                                                                                                                                                                                                                           | 04/1995 to 06/1995  | Health Ministers, Council for GCC States, Ministry of Health and Prevention (United Arab Emirates). United Arab Emirates Family Health Survey 1995.                                                                                                                                                                                                             |
| Census                | De jure, Household, Nationally representative, Subnationally representative                                         | Country       | United Arab Emirates                                                                                                                                                                                                                                                                                                           | Dec-05              | Ministry of Economy (United Arab Emirates). United Arab Emirates Population, Housing, and Establishments Census 2005.                                                                                                                                                                                                                                           |
| Survey                | Longitudinal                                                                                                        | Country       | United Arab Emirates                                                                                                                                                                                                                                                                                                           | Jan-02              | Hamilton Health Sciences, McMaster University (Canada), Population Health Research Institute (PHRI). United Arab Emirates Prospective Urban and Rural Epidemiological Study.                                                                                                                                                                                    |
| Survey                | Cross-sectional, GPS coordinates (GIS), Household, Individual, Interview, Nationally representative, Verbal autopsy | Country       | United Arab Emirates                                                                                                                                                                                                                                                                                                           | 05/2003 to 12/2003  | World Health Organization (WHO). United Arab Emirates World Health Survey 2003. Geneva, Switzerland: World Health Organization (WHO), 2005.                                                                                                                                                                                                                     |
| Scientific literature | NA                                                                                                                  | NA            | Yemen                                                                                                                                                                                                                                                                                                                          | 01/2004 to 12/2004  | Bamashmus MA, Gunaid AA, Khandekar RB. Diabetic retinopathy, visual impairment and ocular status among patients with diabetes mellitus in Yemen: a hospital-based study. Indian J Ophthalmol. 2009; 57(4): 293-8.                                                                                                                                               |
| Scientific literature | NA                                                                                                                  | NA            | Yemen                                                                                                                                                                                                                                                                                                                          | 01/2008 to 12/2008  | Modesti PA, Bamoshmoosh M, Rapi S, Massetti L, Al-Hidabi D, Al Goshae H. Epidemiology of hypertension in Yemen: effects of urbanization and geographical area. Hypertens Res. 2013; 36(8): 711-7.                                                                                                                                                               |



| Data type             | Secondary data type                                                                                                                                                           | Coverage type | Geography                                                                                                                                                                                                                                                                                                                      | Time period covered | Suggested citation                                                                                                                                                                                                                                                   |
|-----------------------|-------------------------------------------------------------------------------------------------------------------------------------------------------------------------------|---------------|--------------------------------------------------------------------------------------------------------------------------------------------------------------------------------------------------------------------------------------------------------------------------------------------------------------------------------|---------------------|----------------------------------------------------------------------------------------------------------------------------------------------------------------------------------------------------------------------------------------------------------------------|
| Scientific literature | NA                                                                                                                                                                            | Country       | Algeria, Argentina, Bahrain, Bangladesh, China, Egypt, India, Indonesia, Iran (Islamic Republic of), Jordan, Kuwait, Libya, Malaysia, Mexico, Morocco, Pakistan, Philippines, Qatar, Russian Federation, Saudi Arabia, Singapore, Republic of Korea, Taiwan (Province of China), Tunisia, Turkiye, United Arab Emirates, Yemen | 01/2009 to 12/2010  | Litwak L, Goh SY, Hussein Z, Malek R, Prusty V, Khamseh ME. Prevalence of diabetes complications in people in type 2 diabetes mellitus and its association with baseline characteristics in the multinational A1chieve study . Diabetol Metab Syndr. 2013; 5(1): 57. |
| Scientific literature | NA                                                                                                                                                                            | NA            | Yemen                                                                                                                                                                                                                                                                                                                          | 01/2000 to 12/2000  | Gunaid AA, Assabri AM. Prevalence of type 2 diabetes and other cardiovascular risk factors in a semirural area in Yemen. East Mediterr Health J. 2008; 14(1): 42-56.                                                                                                 |
| Scientific literature | NA                                                                                                                                                                            | NA            | Sweden, Yemen, 'Adan                                                                                                                                                                                                                                                                                                           | 01/2001 to 12/2005  | Lindblad U, Ek J, Eckner J, Larsson CA, Shan G, Rastam L. Prevalence, awareness, treatment, and control of hypertension: rule of thirds in the Skaraborg project. Scand J Prim Health Care. 2012; 30(2): 88-94.                                                      |
| Scientific literature | NA                                                                                                                                                                            | NA            | Yemen                                                                                                                                                                                                                                                                                                                          | 01/2007 to 12/2008  | Modesti PA, Bamoshmoosh M, Rapi S, Massetti L, Bianchi S, Al-Hidabi D, Al Goshae H. Relationship between hypertension, diabetes and proteinuria in rural and urban households in Yemen. J Hum Hypertens. 2013; 27(9): 572-9.                                         |
| Scientific literature | NA                                                                                                                                                                            | NA            | Yemen                                                                                                                                                                                                                                                                                                                          | 01/2016 to 12/2016  | Dahnani M, Assabri AM, Khader YS. Risk Factors for End-Stage Renal Failure Among Patients on Hemodialysis in Aljomhory Hospital, Sa'adah Governorate, Yemen: Hospital-Based Case-Control Study. JMIR Public Health Surveill. 2019; 5(3): e14215.                     |
| Scientific literature | NA                                                                                                                                                                            | NA            | Yemen                                                                                                                                                                                                                                                                                                                          | 01/2000 to 12/2000  | Al-Habori M, Al-Mamari M, Al-Meerri A. Type II diabetes mellitus and impaired glucose tolerance in Yemen: prevalence, associated metabolic changes and risk factors. Diabetes Res Clin Pract. 2004; 65(3): 275-81.                                                   |
| Report                | Discharge, Epi surveillance, Inpatient, Outpatient, Subnationally representative                                                                                              | Country       | Yemen                                                                                                                                                                                                                                                                                                                          | 01/2012 to 12/2012  | Ministry of Public Health and Population (Yemen). Yemen Annual Statistical Health Report 2012. Sana'a, Yemen: Ministry of Public Health and Population (Yemen).                                                                                                      |
| Report                | Discharge, Epi surveillance, Inpatient, Nationally representative, Outpatient, Urban-rural representative                                                                     | Country       | Yemen                                                                                                                                                                                                                                                                                                                          | 01/2013 to 12/2013  | Ministry of Public Health and Population (Yemen). Yemen Annual Statistical Health Report 2013. Sana'a, Yemen: Ministry of Public Health and Population (Yemen).                                                                                                      |
| Report                | Discharge, Epi surveillance, Inpatient, Nationally representative, Outpatient, Urban-rural representative                                                                     | Country       | Yemen                                                                                                                                                                                                                                                                                                                          | 01/2014 to 12/2014  | Ministry of Public Health and Population (Yemen). Yemen Annual Statistical Health Report 2014.                                                                                                                                                                       |
| Survey                | Cross-sectional, GPS coordinates (GIS), Household, Individual, Interview, Nationally representative, Subnationally representative, Urban-rural representative, Verbal autopsy | Country       | Yemen                                                                                                                                                                                                                                                                                                                          | 09/2013 to 11/2013  | Central Statistical Organization (Yemen), ICF International, Ministry of Public Health and Population (Yemen). Yemen Demographic and Health Survey 2013. Fairfax, United States of America: ICF International.                                                       |
| Survey                | Household, Individual, Interview, Urban-rural representative, Verbal autopsy                                                                                                  | Country       | Yemen                                                                                                                                                                                                                                                                                                                          | 01/2003 to 03/2003  | Central Statistical Organization (Yemen), League of Arab States, Ministry of Public Health and Population (Yemen), Pan Arab Project for Family Health (PAPFAM). Yemen Family Health Survey 2003.                                                                     |
