# Supplementary material for: Burden of type 2 diabetes mellitus and its risk factors in North Africa and the Middle East, 1990–2019: findings from the Global Burden of Disease study 2019
Source: Springer Nature journal article supplement (doi:10.1186/s12889-023-16540-8), 2024-01-05
Supplement: MOESM5 [file 26600498]

| <b>Country name</b> | <b>Year</b> | <b>SDI</b> | <b>SDI quintiles</b> |
|---------------------|-------------|------------|----------------------|
| Afghanistan         | 1990        | 0.187      | 1                    |
| Afghanistan         | 1991        | 0.191      | 1                    |
| Afghanistan         | 1992        | 0.195      | 1                    |
| Afghanistan         | 1993        | 0.196      | 1                    |
| Afghanistan         | 1994        | 0.194      | 1                    |
| Afghanistan         | 1995        | 0.194      | 1                    |
| Afghanistan         | 1996        | 0.193      | 1                    |
| Afghanistan         | 1997        | 0.192      | 1                    |
| Afghanistan         | 1998        | 0.19       | 1                    |
| Afghanistan         | 1999        | 0.189      | 1                    |
| Afghanistan         | 2000        | 0.188      | 1                    |
| Afghanistan         | 2001        | 0.188      | 1                    |
| Afghanistan         | 2002        | 0.194      | 1                    |
| Afghanistan         | 2003        | 0.202      | 1                    |
| Afghanistan         | 2004        | 0.209      | 1                    |
| Afghanistan         | 2005        | 0.216      | 1                    |
| Afghanistan         | 2006        | 0.224      | 1                    |
| Afghanistan         | 2007        | 0.234      | 1                    |
| Afghanistan         | 2008        | 0.243      | 1                    |
| Afghanistan         | 2009        | 0.253      | 1                    |
| Afghanistan         | 2010        | 0.264      | 1                    |
| Afghanistan         | 2011        | 0.274      | 1                    |
| Afghanistan         | 2012        | 0.285      | 1                    |
| Afghanistan         | 2013        | 0.295      | 1                    |
| Afghanistan         | 2014        | 0.304      | 1                    |
| Afghanistan         | 2015        | 0.313      | 1                    |
| Afghanistan         | 2016        | 0.321      | 1                    |
| Afghanistan         | 2017        | 0.329      | 1                    |
| Afghanistan         | 2018        | 0.337      | 1                    |
| Afghanistan         | 2019        | 0.343      | 1                    |

| Country name | Year | SDI   | SDI quintiles |
|--------------|------|-------|---------------|
| Algeria      | 1990 | 0.436 | 3             |
| Algeria      | 1991 | 0.446 | 3             |
| Algeria      | 1992 | 0.456 | 3             |
| Algeria      | 1993 | 0.465 | 3             |
| Algeria      | 1994 | 0.474 | 3             |
| Algeria      | 1995 | 0.483 | 3             |
| Algeria      | 1996 | 0.492 | 3             |
| Algeria      | 1997 | 0.5   | 3             |
| Algeria      | 1998 | 0.509 | 3             |
| Algeria      | 1999 | 0.518 | 3             |
| Algeria      | 2000 | 0.526 | 3             |
| Algeria      | 2001 | 0.534 | 3             |
| Algeria      | 2002 | 0.542 | 3             |
| Algeria      | 2003 | 0.55  | 2             |
| Algeria      | 2004 | 0.558 | 2             |
| Algeria      | 2005 | 0.566 | 2             |
| Algeria      | 2006 | 0.573 | 2             |
| Algeria      | 2007 | 0.58  | 2             |
| Algeria      | 2008 | 0.587 | 2             |
| Algeria      | 2009 | 0.593 | 2             |
| Algeria      | 2010 | 0.599 | 2             |
| Algeria      | 2011 | 0.605 | 2             |
| Algeria      | 2012 | 0.611 | 2             |
| Algeria      | 2013 | 0.617 | 2             |
| Algeria      | 2014 | 0.623 | 2             |
| Algeria      | 2015 | 0.628 | 2             |
| Algeria      | 2016 | 0.634 | 2             |
| Algeria      | 2017 | 0.64  | 2             |
| Algeria      | 2018 | 0.646 | 2             |
| Algeria      | 2019 | 0.652 | 2             |

| Country name | Year | SDI   | SDI quintiles |
|--------------|------|-------|---------------|
| Bahrain      | 1990 | 0.553 | 5             |
| Bahrain      | 1991 | 0.56  | 5             |
| Bahrain      | 1992 | 0.566 | 5             |
| Bahrain      | 1993 | 0.573 | 5             |
| Bahrain      | 1994 | 0.58  | 5             |
| Bahrain      | 1995 | 0.587 | 5             |
| Bahrain      | 1996 | 0.595 | 5             |
| Bahrain      | 1997 | 0.602 | 5             |
| Bahrain      | 1998 | 0.61  | 5             |
| Bahrain      | 1999 | 0.618 | 5             |
| Bahrain      | 2000 | 0.626 | 5             |
| Bahrain      | 2001 | 0.634 | 5             |
| Bahrain      | 2002 | 0.643 | 5             |
| Bahrain      | 2003 | 0.653 | 5             |
| Bahrain      | 2004 | 0.662 | 5             |
| Bahrain      | 2005 | 0.672 | 5             |
| Bahrain      | 2006 | 0.68  | 5             |
| Bahrain      | 2007 | 0.688 | 4             |
| Bahrain      | 2008 | 0.697 | 4             |
| Bahrain      | 2009 | 0.705 | 4             |
| Bahrain      | 2010 | 0.711 | 4             |
| Bahrain      | 2011 | 0.715 | 4             |
| Bahrain      | 2012 | 0.72  | 4             |
| Bahrain      | 2013 | 0.726 | 4             |
| Bahrain      | 2014 | 0.731 | 4             |
| Bahrain      | 2015 | 0.735 | 4             |
| Bahrain      | 2016 | 0.739 | 4             |
| Bahrain      | 2017 | 0.743 | 4             |
| Bahrain      | 2018 | 0.747 | 4             |
| Bahrain      | 2019 | 0.751 | 4             |

| Country name | Year | SDI   | SDI quintiles |
|--------------|------|-------|---------------|
| Egypt        | 1990 | 0.403 | 2             |
| Egypt        | 1991 | 0.415 | 2             |
| Egypt        | 1992 | 0.426 | 2             |
| Egypt        | 1993 | 0.437 | 2             |
| Egypt        | 1994 | 0.448 | 2             |
| Egypt        | 1995 | 0.459 | 2             |
| Egypt        | 1996 | 0.469 | 2             |
| Egypt        | 1997 | 0.478 | 2             |
| Egypt        | 1998 | 0.487 | 2             |
| Egypt        | 1999 | 0.496 | 2             |
| Egypt        | 2000 | 0.504 | 2             |
| Egypt        | 2001 | 0.512 | 2             |
| Egypt        | 2002 | 0.52  | 2             |
| Egypt        | 2003 | 0.527 | 2             |
| Egypt        | 2004 | 0.535 | 2             |
| Egypt        | 2005 | 0.542 | 2             |
| Egypt        | 2006 | 0.549 | 2             |
| Egypt        | 2007 | 0.557 | 2             |
| Egypt        | 2008 | 0.565 | 2             |
| Egypt        | 2009 | 0.573 | 2             |
| Egypt        | 2010 | 0.582 | 2             |
| Egypt        | 2011 | 0.591 | 2             |
| Egypt        | 2012 | 0.6   | 2             |
| Egypt        | 2013 | 0.609 | 2             |
| Egypt        | 2014 | 0.617 | 2             |
| Egypt        | 2015 | 0.626 | 2             |
| Egypt        | 2016 | 0.635 | 2             |
| Egypt        | 2017 | 0.643 | 2             |
| Egypt        | 2018 | 0.651 | 2             |
| Egypt        | 2019 | 0.658 | 2             |

| Country name               | Year | SDI   | SDI quintiles |
|----------------------------|------|-------|---------------|
| Iran (Islamic Republic of) | 1990 | 0.404 | 2             |
| Iran (Islamic Republic of) | 1991 | 0.419 | 2             |
| Iran (Islamic Republic of) | 1992 | 0.433 | 2             |
| Iran (Islamic Republic of) | 1993 | 0.446 | 2             |
| Iran (Islamic Republic of) | 1994 | 0.457 | 2             |
| Iran (Islamic Republic of) | 1995 | 0.468 | 2             |
| Iran (Islamic Republic of) | 1996 | 0.477 | 2             |
| Iran (Islamic Republic of) | 1997 | 0.486 | 2             |
| Iran (Islamic Republic of) | 1998 | 0.496 | 2             |
| Iran (Islamic Republic of) | 1999 | 0.506 | 2             |
| Iran (Islamic Republic of) | 2000 | 0.517 | 2             |
| Iran (Islamic Republic of) | 2001 | 0.529 | 2             |
| Iran (Islamic Republic of) | 2002 | 0.541 | 2             |
| Iran (Islamic Republic of) | 2003 | 0.552 | 3             |
| Iran (Islamic Republic of) | 2004 | 0.562 | 3             |
| Iran (Islamic Republic of) | 2005 | 0.571 | 3             |
| Iran (Islamic Republic of) | 2006 | 0.581 | 3             |
| Iran (Islamic Republic of) | 2007 | 0.593 | 3             |
| Iran (Islamic Republic of) | 2008 | 0.603 | 3             |
| Iran (Islamic Republic of) | 2009 | 0.613 | 3             |
| Iran (Islamic Republic of) | 2010 | 0.622 | 3             |
| Iran (Islamic Republic of) | 2011 | 0.63  | 3             |
| Iran (Islamic Republic of) | 2012 | 0.635 | 3             |
| Iran (Islamic Republic of) | 2013 | 0.64  | 3             |
| Iran (Islamic Republic of) | 2014 | 0.645 | 3             |
| Iran (Islamic Republic of) | 2015 | 0.649 | 3             |
| Iran (Islamic Republic of) | 2016 | 0.654 | 3             |
| Iran (Islamic Republic of) | 2017 | 0.659 | 3             |
| Iran (Islamic Republic of) | 2018 | 0.665 | 3             |
| Iran (Islamic Republic of) | 2019 | 0.67  | 2             |

| Country name | Year | SDI   | SDI quintiles |
|--------------|------|-------|---------------|
| Iraq         | 1990 | 0.392 | 2             |
| Iraq         | 1991 | 0.397 | 2             |
| Iraq         | 1992 | 0.402 | 2             |
| Iraq         | 1993 | 0.407 | 2             |
| Iraq         | 1994 | 0.412 | 2             |
| Iraq         | 1995 | 0.417 | 2             |
| Iraq         | 1996 | 0.422 | 2             |
| Iraq         | 1997 | 0.429 | 2             |
| Iraq         | 1998 | 0.439 | 2             |
| Iraq         | 1999 | 0.451 | 2             |
| Iraq         | 2000 | 0.462 | 2             |
| Iraq         | 2001 | 0.475 | 2             |
| Iraq         | 2002 | 0.485 | 2             |
| Iraq         | 2003 | 0.493 | 2             |
| Iraq         | 2004 | 0.504 | 2             |
| Iraq         | 2005 | 0.514 | 2             |
| Iraq         | 2006 | 0.525 | 2             |
| Iraq         | 2007 | 0.535 | 2             |
| Iraq         | 2008 | 0.547 | 2             |
| Iraq         | 2009 | 0.558 | 2             |
| Iraq         | 2010 | 0.57  | 2             |
| Iraq         | 2011 | 0.583 | 2             |
| Iraq         | 2012 | 0.597 | 2             |
| Iraq         | 2013 | 0.61  | 2             |
| Iraq         | 2014 | 0.622 | 2             |
| Iraq         | 2015 | 0.632 | 2             |
| Iraq         | 2016 | 0.644 | 2             |
| Iraq         | 2017 | 0.654 | 2             |
| Iraq         | 2018 | 0.663 | 2             |
| Iraq         | 2019 | 0.671 | 3             |

| Country name | Year | SDI   | SDI quintiles |
|--------------|------|-------|---------------|
| Jordan       | 1990 | 0.52  | 4             |
| Jordan       | 1991 | 0.529 | 4             |
| Jordan       | 1992 | 0.537 | 4             |
| Jordan       | 1993 | 0.546 | 4             |
| Jordan       | 1994 | 0.554 | 4             |
| Jordan       | 1995 | 0.562 | 4             |
| Jordan       | 1996 | 0.57  | 4             |
| Jordan       | 1997 | 0.577 | 4             |
| Jordan       | 1998 | 0.585 | 4             |
| Jordan       | 1999 | 0.592 | 4             |
| Jordan       | 2000 | 0.6   | 4             |
| Jordan       | 2001 | 0.607 | 4             |
| Jordan       | 2002 | 0.614 | 4             |
| Jordan       | 2003 | 0.621 | 4             |
| Jordan       | 2004 | 0.63  | 4             |
| Jordan       | 2005 | 0.639 | 4             |
| Jordan       | 2006 | 0.648 | 4             |
| Jordan       | 2007 | 0.656 | 4             |
| Jordan       | 2008 | 0.664 | 4             |
| Jordan       | 2009 | 0.673 | 4             |
| Jordan       | 2010 | 0.681 | 4             |
| Jordan       | 2011 | 0.688 | 3             |
| Jordan       | 2012 | 0.695 | 3             |
| Jordan       | 2013 | 0.702 | 3             |
| Jordan       | 2014 | 0.707 | 3             |
| Jordan       | 2015 | 0.713 | 4             |
| Jordan       | 2016 | 0.718 | 4             |
| Jordan       | 2017 | 0.723 | 4             |
| Jordan       | 2018 | 0.727 | 4             |
| Jordan       | 2019 | 0.731 | 4             |

| Country name | Year | SDI   | SDI quintiles |
|--------------|------|-------|---------------|
| Kuwait       | 1990 | 0.655 | 5             |
| Kuwait       | 1991 | 0.659 | 5             |
| Kuwait       | 1992 | 0.662 | 5             |
| Kuwait       | 1993 | 0.667 | 5             |
| Kuwait       | 1994 | 0.673 | 5             |
| Kuwait       | 1995 | 0.68  | 5             |
| Kuwait       | 1996 | 0.689 | 5             |
| Kuwait       | 1997 | 0.699 | 5             |
| Kuwait       | 1998 | 0.709 | 5             |
| Kuwait       | 1999 | 0.717 | 5             |
| Kuwait       | 2000 | 0.724 | 5             |
| Kuwait       | 2001 | 0.729 | 5             |
| Kuwait       | 2002 | 0.735 | 5             |
| Kuwait       | 2003 | 0.742 | 5             |
| Kuwait       | 2004 | 0.75  | 5             |
| Kuwait       | 2005 | 0.76  | 5             |
| Kuwait       | 2006 | 0.769 | 5             |
| Kuwait       | 2007 | 0.777 | 5             |
| Kuwait       | 2008 | 0.785 | 5             |
| Kuwait       | 2009 | 0.793 | 5             |
| Kuwait       | 2010 | 0.801 | 5             |
| Kuwait       | 2011 | 0.808 | 5             |
| Kuwait       | 2012 | 0.815 | 5             |
| Kuwait       | 2013 | 0.822 | 5             |
| Kuwait       | 2014 | 0.828 | 5             |
| Kuwait       | 2015 | 0.834 | 5             |
| Kuwait       | 2016 | 0.839 | 5             |
| Kuwait       | 2017 | 0.844 | 5             |
| Kuwait       | 2018 | 0.848 | 5             |
| Kuwait       | 2019 | 0.851 | 5             |



| Country name | Year | SDI   | SDI quintiles |
|--------------|------|-------|---------------|
| Lebanon      | 1990 | 0.462 | 4             |
| Lebanon      | 1991 | 0.47  | 4             |
| Lebanon      | 1992 | 0.477 | 4             |
| Lebanon      | 1993 | 0.485 | 3             |
| Lebanon      | 1994 | 0.493 | 3             |
| Lebanon      | 1995 | 0.502 | 3             |
| Lebanon      | 1996 | 0.511 | 3             |
| Lebanon      | 1997 | 0.52  | 3             |
| Lebanon      | 1998 | 0.53  | 3             |
| Lebanon      | 1999 | 0.54  | 3             |
| Lebanon      | 2000 | 0.548 | 3             |
| Lebanon      | 2001 | 0.557 | 3             |
| Lebanon      | 2002 | 0.565 | 3             |
| Lebanon      | 2003 | 0.574 | 3             |
| Lebanon      | 2004 | 0.582 | 3             |
| Lebanon      | 2005 | 0.591 | 3             |
| Lebanon      | 2006 | 0.6   | 3             |
| Lebanon      | 2007 | 0.609 | 3             |
| Lebanon      | 2008 | 0.618 | 3             |
| Lebanon      | 2009 | 0.628 | 3             |
| Lebanon      | 2010 | 0.639 | 3             |
| Lebanon      | 2011 | 0.649 | 3             |
| Lebanon      | 2012 | 0.66  | 3             |
| Lebanon      | 2013 | 0.67  | 3             |
| Lebanon      | 2014 | 0.677 | 3             |
| Lebanon      | 2015 | 0.685 | 3             |
| Lebanon      | 2016 | 0.691 | 3             |
| Lebanon      | 2017 | 0.698 | 3             |
| Lebanon      | 2018 | 0.704 | 3             |
| Lebanon      | 2019 | 0.708 | 3             |

| Country name | Year | SDI   | SDI quintiles |
|--------------|------|-------|---------------|
| Libya        | 1990 | 0.405 | 3             |
| Libya        | 1991 | 0.422 | 3             |
| Libya        | 1992 | 0.438 | 3             |
| Libya        | 1993 | 0.455 | 3             |
| Libya        | 1994 | 0.472 | 3             |
| Libya        | 1995 | 0.489 | 3             |
| Libya        | 1996 | 0.506 | 3             |
| Libya        | 1997 | 0.522 | 3             |
| Libya        | 1998 | 0.538 | 3             |
| Libya        | 1999 | 0.552 | 3             |
| Libya        | 2000 | 0.566 | 3             |
| Libya        | 2001 | 0.58  | 3             |
| Libya        | 2002 | 0.593 | 3             |
| Libya        | 2003 | 0.606 | 3             |
| Libya        | 2004 | 0.619 | 3             |
| Libya        | 2005 | 0.632 | 4             |
| Libya        | 2006 | 0.645 | 4             |
| Libya        | 2007 | 0.658 | 4             |
| Libya        | 2008 | 0.67  | 4             |
| Libya        | 2009 | 0.681 | 4             |
| Libya        | 2010 | 0.691 | 4             |
| Libya        | 2011 | 0.695 | 4             |
| Libya        | 2012 | 0.703 | 4             |
| Libya        | 2013 | 0.707 | 4             |
| Libya        | 2014 | 0.707 | 3             |
| Libya        | 2015 | 0.707 | 3             |
| Libya        | 2016 | 0.705 | 3             |
| Libya        | 2017 | 0.705 | 3             |
| Libya        | 2018 | 0.707 | 3             |
| Libya        | 2019 | 0.709 | 3             |

| Country name | Year | SDI   | SDI quintiles |
|--------------|------|-------|---------------|
| Morocco      | 1990 | 0.347 | 1             |
| Morocco      | 1991 | 0.354 | 1             |
| Morocco      | 1992 | 0.361 | 1             |
| Morocco      | 1993 | 0.367 | 1             |
| Morocco      | 1994 | 0.374 | 1             |
| Morocco      | 1995 | 0.38  | 1             |
| Morocco      | 1996 | 0.386 | 1             |
| Morocco      | 1997 | 0.392 | 1             |
| Morocco      | 1998 | 0.398 | 1             |
| Morocco      | 1999 | 0.403 | 1             |
| Morocco      | 2000 | 0.409 | 1             |
| Morocco      | 2001 | 0.414 | 1             |
| Morocco      | 2002 | 0.42  | 1             |
| Morocco      | 2003 | 0.426 | 1             |
| Morocco      | 2004 | 0.432 | 1             |
| Morocco      | 2005 | 0.439 | 1             |
| Morocco      | 2006 | 0.445 | 1             |
| Morocco      | 2007 | 0.452 | 1             |
| Morocco      | 2008 | 0.46  | 1             |
| Morocco      | 2009 | 0.467 | 1             |
| Morocco      | 2010 | 0.475 | 1             |
| Morocco      | 2011 | 0.483 | 1             |
| Morocco      | 2012 | 0.491 | 1             |
| Morocco      | 2013 | 0.499 | 1             |
| Morocco      | 2014 | 0.508 | 1             |
| Morocco      | 2015 | 0.516 | 1             |
| Morocco      | 2016 | 0.524 | 1             |
| Morocco      | 2017 | 0.533 | 1             |
| Morocco      | 2018 | 0.541 | 1             |
| Morocco      | 2019 | 0.548 | 1             |

| Country name | Year | SDI   | SDI quintiles |
|--------------|------|-------|---------------|
| Oman         | 1990 | 0.441 | 3             |
| Oman         | 1991 | 0.455 | 3             |
| Oman         | 1992 | 0.469 | 3             |
| Oman         | 1993 | 0.485 | 3             |
| Oman         | 1994 | 0.5   | 4             |
| Oman         | 1995 | 0.514 | 4             |
| Oman         | 1996 | 0.528 | 4             |
| Oman         | 1997 | 0.543 | 4             |
| Oman         | 1998 | 0.558 | 4             |
| Oman         | 1999 | 0.573 | 4             |
| Oman         | 2000 | 0.588 | 4             |
| Oman         | 2001 | 0.601 | 4             |
| Oman         | 2002 | 0.615 | 4             |
| Oman         | 2003 | 0.628 | 4             |
| Oman         | 2004 | 0.641 | 4             |
| Oman         | 2005 | 0.653 | 4             |
| Oman         | 2006 | 0.664 | 4             |
| Oman         | 2007 | 0.678 | 4             |
| Oman         | 2008 | 0.692 | 4             |
| Oman         | 2009 | 0.704 | 4             |
| Oman         | 2010 | 0.715 | 4             |
| Oman         | 2011 | 0.726 | 4             |
| Oman         | 2012 | 0.737 | 4             |
| Oman         | 2013 | 0.747 | 4             |
| Oman         | 2014 | 0.754 | 4             |
| Oman         | 2015 | 0.76  | 4             |
| Oman         | 2016 | 0.767 | 4             |
| Oman         | 2017 | 0.773 | 4             |
| Oman         | 2018 | 0.778 | 4             |
| Oman         | 2019 | 0.783 | 4             |

| Country name | Year | SDI   | SDI quintiles |
|--------------|------|-------|---------------|
| Palestine    | 1990 | 0.314 | 1             |
| Palestine    | 1991 | 0.32  | 1             |
| Palestine    | 1992 | 0.329 | 1             |
| Palestine    | 1993 | 0.337 | 1             |
| Palestine    | 1994 | 0.347 | 1             |
| Palestine    | 1995 | 0.356 | 1             |
| Palestine    | 1996 | 0.365 | 1             |
| Palestine    | 1997 | 0.375 | 1             |
| Palestine    | 1998 | 0.386 | 1             |
| Palestine    | 1999 | 0.397 | 1             |
| Palestine    | 2000 | 0.407 | 1             |
| Palestine    | 2001 | 0.415 | 1             |
| Palestine    | 2002 | 0.422 | 1             |
| Palestine    | 2003 | 0.43  | 1             |
| Palestine    | 2004 | 0.439 | 1             |
| Palestine    | 2005 | 0.449 | 1             |
| Palestine    | 2006 | 0.458 | 1             |
| Palestine    | 2007 | 0.467 | 1             |
| Palestine    | 2008 | 0.476 | 1             |
| Palestine    | 2009 | 0.486 | 1             |
| Palestine    | 2010 | 0.497 | 1             |
| Palestine    | 2011 | 0.509 | 1             |
| Palestine    | 2012 | 0.521 | 1             |
| Palestine    | 2013 | 0.533 | 1             |
| Palestine    | 2014 | 0.543 | 1             |
| Palestine    | 2015 | 0.553 | 1             |
| Palestine    | 2016 | 0.564 | 1             |
| Palestine    | 2017 | 0.573 | 1             |
| Palestine    | 2018 | 0.582 | 1             |
| Palestine    | 2019 | 0.588 | 1             |

| Country name | Year | SDI   | SDI quintiles |
|--------------|------|-------|---------------|
| Qatar        | 1990 | 0.585 | 5             |
| Qatar        | 1991 | 0.598 | 5             |
| Qatar        | 1992 | 0.61  | 5             |
| Qatar        | 1993 | 0.621 | 5             |
| Qatar        | 1994 | 0.632 | 5             |
| Qatar        | 1995 | 0.643 | 5             |
| Qatar        | 1996 | 0.654 | 5             |
| Qatar        | 1997 | 0.666 | 5             |
| Qatar        | 1998 | 0.676 | 5             |
| Qatar        | 1999 | 0.685 | 5             |
| Qatar        | 2000 | 0.694 | 5             |
| Qatar        | 2001 | 0.703 | 5             |
| Qatar        | 2002 | 0.711 | 5             |
| Qatar        | 2003 | 0.719 | 5             |
| Qatar        | 2004 | 0.727 | 5             |
| Qatar        | 2005 | 0.735 | 5             |
| Qatar        | 2006 | 0.743 | 5             |
| Qatar        | 2007 | 0.75  | 5             |
| Qatar        | 2008 | 0.757 | 5             |
| Qatar        | 2009 | 0.764 | 5             |
| Qatar        | 2010 | 0.772 | 5             |
| Qatar        | 2011 | 0.779 | 5             |
| Qatar        | 2012 | 0.786 | 5             |
| Qatar        | 2013 | 0.793 | 5             |
| Qatar        | 2014 | 0.799 | 5             |
| Qatar        | 2015 | 0.806 | 5             |
| Qatar        | 2016 | 0.812 | 5             |
| Qatar        | 2017 | 0.818 | 5             |
| Qatar        | 2018 | 0.825 | 5             |
| Qatar        | 2019 | 0.83  | 5             |

| Country name | Year | SDI   | SDI quintiles |
|--------------|------|-------|---------------|
| Saudi Arabia | 1990 | 0.48  | 4             |
| Saudi Arabia | 1991 | 0.491 | 4             |
| Saudi Arabia | 1992 | 0.504 | 4             |
| Saudi Arabia | 1993 | 0.516 | 4             |
| Saudi Arabia | 1994 | 0.529 | 4             |
| Saudi Arabia | 1995 | 0.541 | 4             |
| Saudi Arabia | 1996 | 0.554 | 4             |
| Saudi Arabia | 1997 | 0.566 | 4             |
| Saudi Arabia | 1998 | 0.578 | 4             |
| Saudi Arabia | 1999 | 0.59  | 4             |
| Saudi Arabia | 2000 | 0.602 | 4             |
| Saudi Arabia | 2001 | 0.614 | 4             |
| Saudi Arabia | 2002 | 0.625 | 4             |
| Saudi Arabia | 2003 | 0.637 | 4             |
| Saudi Arabia | 2004 | 0.65  | 4             |
| Saudi Arabia | 2005 | 0.664 | 4             |
| Saudi Arabia | 2006 | 0.677 | 4             |
| Saudi Arabia | 2007 | 0.69  | 5             |
| Saudi Arabia | 2008 | 0.703 | 5             |
| Saudi Arabia | 2009 | 0.715 | 5             |
| Saudi Arabia | 2010 | 0.726 | 5             |
| Saudi Arabia | 2011 | 0.738 | 5             |
| Saudi Arabia | 2012 | 0.75  | 5             |
| Saudi Arabia | 2013 | 0.76  | 5             |
| Saudi Arabia | 2014 | 0.769 | 5             |
| Saudi Arabia | 2015 | 0.778 | 5             |
| Saudi Arabia | 2016 | 0.786 | 5             |
| Saudi Arabia | 2017 | 0.793 | 5             |
| Saudi Arabia | 2018 | 0.8   | 5             |
| Saudi Arabia | 2019 | 0.805 | 5             |

| Country name | Year | SDI   | SDI quintiles |
|--------------|------|-------|---------------|
| Sudan        | 1990 | 0.227 | 1             |
| Sudan        | 1991 | 0.234 | 1             |
| Sudan        | 1992 | 0.241 | 1             |
| Sudan        | 1993 | 0.248 | 1             |
| Sudan        | 1994 | 0.256 | 1             |
| Sudan        | 1995 | 0.263 | 1             |
| Sudan        | 1996 | 0.271 | 1             |
| Sudan        | 1997 | 0.28  | 1             |
| Sudan        | 1998 | 0.289 | 1             |
| Sudan        | 1999 | 0.298 | 1             |
| Sudan        | 2000 | 0.308 | 1             |
| Sudan        | 2001 | 0.318 | 1             |
| Sudan        | 2002 | 0.327 | 1             |
| Sudan        | 2003 | 0.337 | 1             |
| Sudan        | 2004 | 0.348 | 1             |
| Sudan        | 2005 | 0.358 | 1             |
| Sudan        | 2006 | 0.37  | 1             |
| Sudan        | 2007 | 0.381 | 1             |
| Sudan        | 2008 | 0.393 | 1             |
| Sudan        | 2009 | 0.404 | 1             |
| Sudan        | 2010 | 0.416 | 1             |
| Sudan        | 2011 | 0.428 | 1             |
| Sudan        | 2012 | 0.44  | 1             |
| Sudan        | 2013 | 0.451 | 1             |
| Sudan        | 2014 | 0.462 | 1             |
| Sudan        | 2015 | 0.474 | 1             |
| Sudan        | 2016 | 0.485 | 1             |
| Sudan        | 2017 | 0.497 | 1             |
| Sudan        | 2018 | 0.507 | 1             |
| Sudan        | 2019 | 0.515 | 1             |



| <b>Country name</b>  | <b>Year</b> | <b>SDI</b> | <b>SDI quintiles</b> |
|----------------------|-------------|------------|----------------------|
| Syrian Arab Republic | 1990        | 0.367      | 2                    |
| Syrian Arab Republic | 1991        | 0.376      | 2                    |
| Syrian Arab Republic | 1992        | 0.387      | 2                    |
| Syrian Arab Republic | 1993        | 0.398      | 2                    |
| Syrian Arab Republic | 1994        | 0.409      | 2                    |
| Syrian Arab Republic | 1995        | 0.421      | 2                    |
| Syrian Arab Republic | 1996        | 0.432      | 2                    |
| Syrian Arab Republic | 1997        | 0.443      | 2                    |
| Syrian Arab Republic | 1998        | 0.454      | 2                    |
| Syrian Arab Republic | 1999        | 0.465      | 2                    |
| Syrian Arab Republic | 2000        | 0.476      | 2                    |
| Syrian Arab Republic | 2001        | 0.486      | 2                    |
| Syrian Arab Republic | 2002        | 0.497      | 2                    |
| Syrian Arab Republic | 2003        | 0.508      | 2                    |
| Syrian Arab Republic | 2004        | 0.521      | 2                    |
| Syrian Arab Republic | 2005        | 0.535      | 2                    |
| Syrian Arab Republic | 2006        | 0.548      | 2                    |
| Syrian Arab Republic | 2007        | 0.56       | 2                    |
| Syrian Arab Republic | 2008        | 0.572      | 2                    |
| Syrian Arab Republic | 2009        | 0.583      | 2                    |
| Syrian Arab Republic | 2010        | 0.594      | 2                    |
| Syrian Arab Republic | 2011        | 0.601      | 2                    |
| Syrian Arab Republic | 2012        | 0.605      | 2                    |
| Syrian Arab Republic | 2013        | 0.606      | 2                    |
| Syrian Arab Republic | 2014        | 0.607      | 2                    |
| Syrian Arab Republic | 2015        | 0.608      | 2                    |
| Syrian Arab Republic | 2016        | 0.61       | 2                    |
| Syrian Arab Republic | 2017        | 0.613      | 2                    |
| Syrian Arab Republic | 2018        | 0.616      | 2                    |
| Syrian Arab Republic | 2019        | 0.619      | 2                    |

| Country name | Year | SDI   | SDI quintiles |
|--------------|------|-------|---------------|
| Tunisia      | 1990 | 0.434 | 3             |
| Tunisia      | 1991 | 0.444 | 3             |
| Tunisia      | 1992 | 0.455 | 3             |
| Tunisia      | 1993 | 0.466 | 3             |
| Tunisia      | 1994 | 0.476 | 3             |
| Tunisia      | 1995 | 0.487 | 3             |
| Tunisia      | 1996 | 0.498 | 3             |
| Tunisia      | 1997 | 0.508 | 3             |
| Tunisia      | 1998 | 0.518 | 3             |
| Tunisia      | 1999 | 0.528 | 3             |
| Tunisia      | 2000 | 0.538 | 3             |
| Tunisia      | 2001 | 0.548 | 3             |
| Tunisia      | 2002 | 0.556 | 3             |
| Tunisia      | 2003 | 0.565 | 3             |
| Tunisia      | 2004 | 0.574 | 3             |
| Tunisia      | 2005 | 0.582 | 3             |
| Tunisia      | 2006 | 0.591 | 3             |
| Tunisia      | 2007 | 0.599 | 3             |
| Tunisia      | 2008 | 0.607 | 3             |
| Tunisia      | 2009 | 0.614 | 3             |
| Tunisia      | 2010 | 0.622 | 3             |
| Tunisia      | 2011 | 0.628 | 3             |
| Tunisia      | 2012 | 0.634 | 3             |
| Tunisia      | 2013 | 0.64  | 3             |
| Tunisia      | 2014 | 0.646 | 3             |
| Tunisia      | 2015 | 0.651 | 3             |
| Tunisia      | 2016 | 0.657 | 3             |
| Tunisia      | 2017 | 0.662 | 3             |
| Tunisia      | 2018 | 0.667 | 3             |
| Tunisia      | 2019 | 0.672 | 3             |

| Country name | Year | SDI   | SDI quintiles |
|--------------|------|-------|---------------|
| Turkey       | 1990 | 0.473 | 4             |
| Turkey       | 1991 | 0.483 | 4             |
| Turkey       | 1992 | 0.493 | 4             |
| Turkey       | 1993 | 0.504 | 4             |
| Turkey       | 1994 | 0.513 | 4             |
| Turkey       | 1995 | 0.523 | 4             |
| Turkey       | 1996 | 0.534 | 4             |
| Turkey       | 1997 | 0.545 | 4             |
| Turkey       | 1998 | 0.556 | 4             |
| Turkey       | 1999 | 0.566 | 4             |
| Turkey       | 2000 | 0.577 | 4             |
| Turkey       | 2001 | 0.587 | 4             |
| Turkey       | 2002 | 0.597 | 4             |
| Turkey       | 2003 | 0.607 | 4             |
| Turkey       | 2004 | 0.619 | 3             |
| Turkey       | 2005 | 0.63  | 3             |
| Turkey       | 2006 | 0.641 | 3             |
| Turkey       | 2007 | 0.652 | 3             |
| Turkey       | 2008 | 0.663 | 3             |
| Turkey       | 2009 | 0.671 | 3             |
| Turkey       | 2010 | 0.68  | 3             |
| Turkey       | 2011 | 0.689 | 4             |
| Turkey       | 2012 | 0.698 | 4             |
| Turkey       | 2013 | 0.707 | 4             |
| Turkey       | 2014 | 0.715 | 4             |
| Turkey       | 2015 | 0.723 | 4             |
| Turkey       | 2016 | 0.729 | 4             |
| Turkey       | 2017 | 0.736 | 4             |
| Turkey       | 2018 | 0.743 | 4             |
| Turkey       | 2019 | 0.748 | 4             |

| Country name         | Year | SDI   | SDI quintiles |
|----------------------|------|-------|---------------|
| United Arab Emirates | 1990 | 0.621 | 5             |
| United Arab Emirates | 1991 | 0.637 | 5             |
| United Arab Emirates | 1992 | 0.653 | 5             |
| United Arab Emirates | 1993 | 0.669 | 5             |
| United Arab Emirates | 1994 | 0.685 | 5             |
| United Arab Emirates | 1995 | 0.7   | 5             |
| United Arab Emirates | 1996 | 0.714 | 5             |
| United Arab Emirates | 1997 | 0.727 | 5             |
| United Arab Emirates | 1998 | 0.74  | 5             |
| United Arab Emirates | 1999 | 0.751 | 5             |
| United Arab Emirates | 2000 | 0.762 | 5             |
| United Arab Emirates | 2001 | 0.773 | 5             |
| United Arab Emirates | 2002 | 0.783 | 5             |
| United Arab Emirates | 2003 | 0.792 | 5             |
| United Arab Emirates | 2004 | 0.801 | 5             |
| United Arab Emirates | 2005 | 0.81  | 5             |
| United Arab Emirates | 2006 | 0.819 | 5             |
| United Arab Emirates | 2007 | 0.829 | 5             |
| United Arab Emirates | 2008 | 0.838 | 5             |
| United Arab Emirates | 2009 | 0.846 | 5             |
| United Arab Emirates | 2010 | 0.853 | 5             |
| United Arab Emirates | 2011 | 0.859 | 5             |
| United Arab Emirates | 2012 | 0.863 | 5             |
| United Arab Emirates | 2013 | 0.868 | 5             |
| United Arab Emirates | 2014 | 0.87  | 5             |
| United Arab Emirates | 2015 | 0.872 | 5             |
| United Arab Emirates | 2016 | 0.874 | 5             |
| United Arab Emirates | 2017 | 0.876 | 5             |
| United Arab Emirates | 2018 | 0.879 | 5             |
| United Arab Emirates | 2019 | 0.88  | 5             |

| Country name | Year | SDI   | SDI quintiles |
|--------------|------|-------|---------------|
| Yemen        | 1990 | 0.176 | 1             |
| Yemen        | 1991 | 0.183 | 1             |
| Yemen        | 1992 | 0.191 | 1             |
| Yemen        | 1993 | 0.198 | 1             |
| Yemen        | 1994 | 0.207 | 1             |
| Yemen        | 1995 | 0.215 | 1             |
| Yemen        | 1996 | 0.224 | 1             |
| Yemen        | 1997 | 0.234 | 1             |
| Yemen        | 1998 | 0.243 | 1             |
| Yemen        | 1999 | 0.253 | 1             |
| Yemen        | 2000 | 0.263 | 1             |
| Yemen        | 2001 | 0.273 | 1             |
| Yemen        | 2002 | 0.283 | 1             |
| Yemen        | 2003 | 0.293 | 1             |
| Yemen        | 2004 | 0.303 | 1             |
| Yemen        | 2005 | 0.314 | 1             |
| Yemen        | 2006 | 0.325 | 1             |
| Yemen        | 2007 | 0.335 | 1             |
| Yemen        | 2008 | 0.346 | 1             |
| Yemen        | 2009 | 0.356 | 1             |
| Yemen        | 2010 | 0.366 | 1             |
| Yemen        | 2011 | 0.375 | 1             |
| Yemen        | 2012 | 0.384 | 1             |
| Yemen        | 2013 | 0.393 | 1             |
| Yemen        | 2014 | 0.402 | 1             |
| Yemen        | 2015 | 0.407 | 1             |
| Yemen        | 2016 | 0.41  | 1             |
| Yemen        | 2017 | 0.412 | 1             |
| Yemen        | 2018 | 0.413 | 1             |
| Yemen        | 2019 | 0.412 | 1             |
