# Supplementary material for: Burden of type 2 diabetes mellitus and its risk factors in North Africa and the Middle East, 1990–2019: findings from the Global Burden of Disease study 2019
Source: Springer Nature journal article supplement (doi:10.1186/s12889-023-16540-8), 2024-01-05

1990

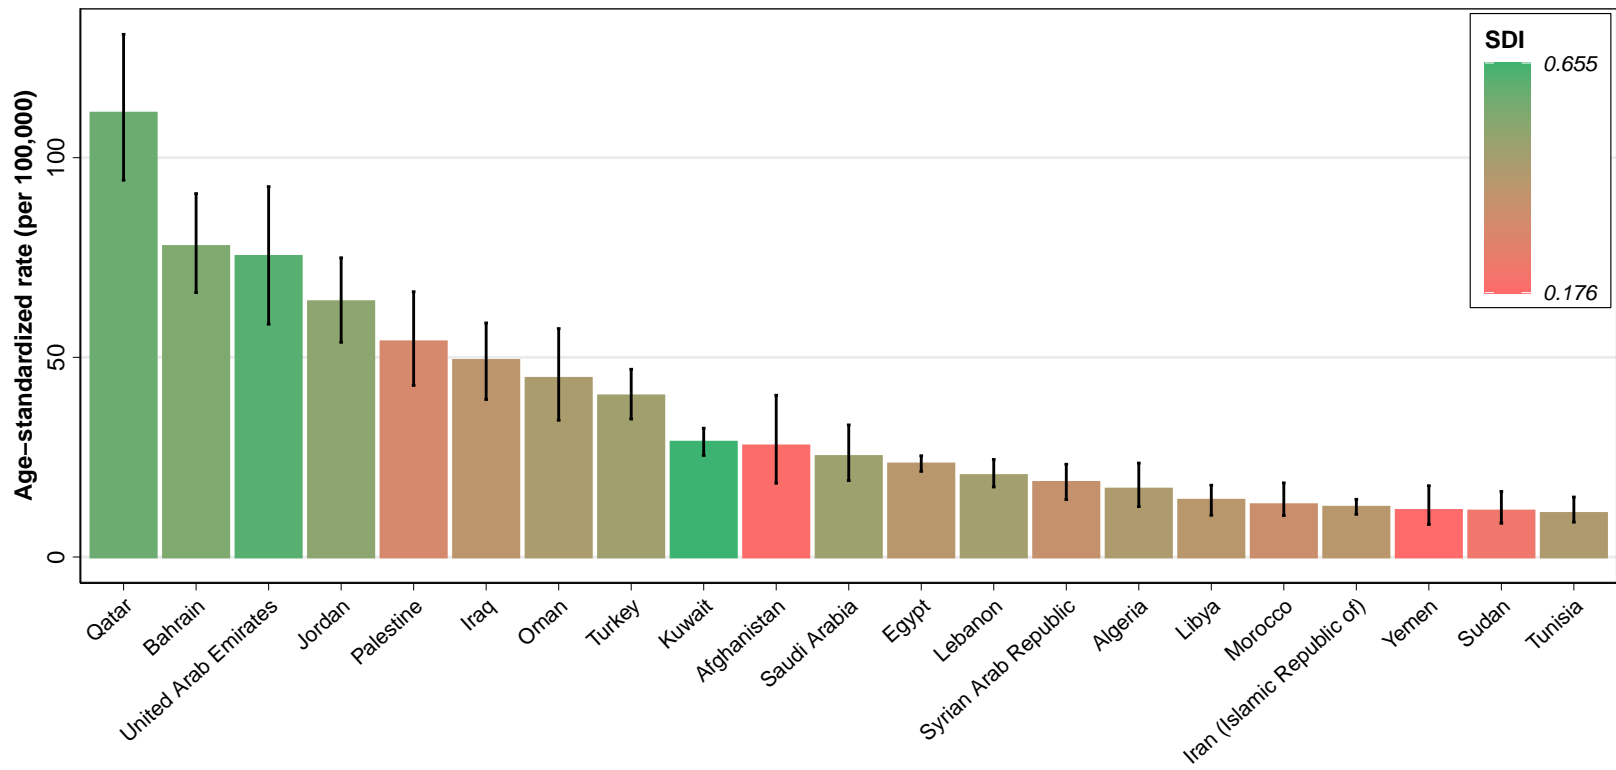

2000

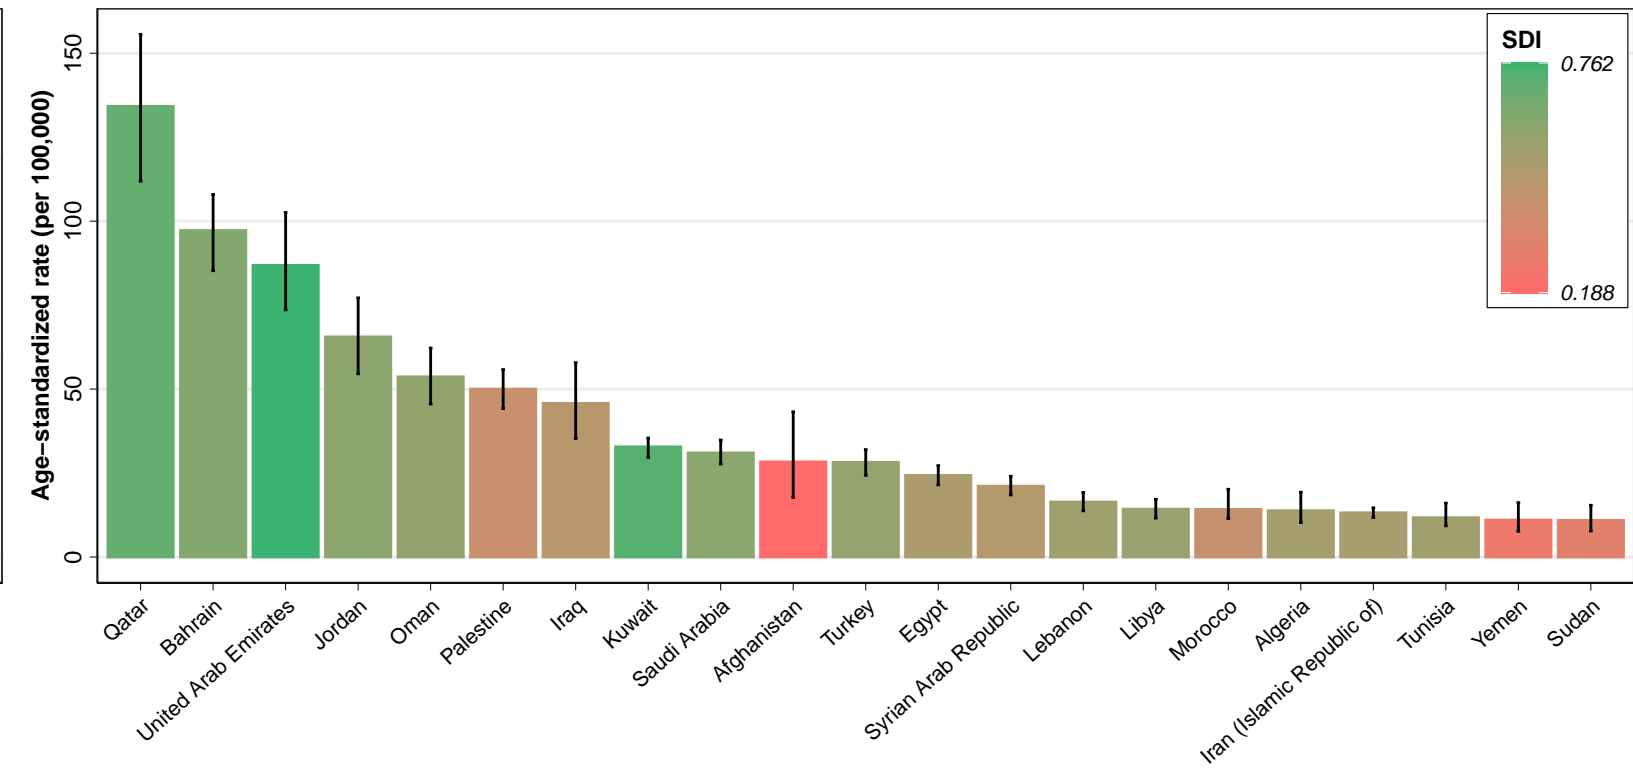

2010

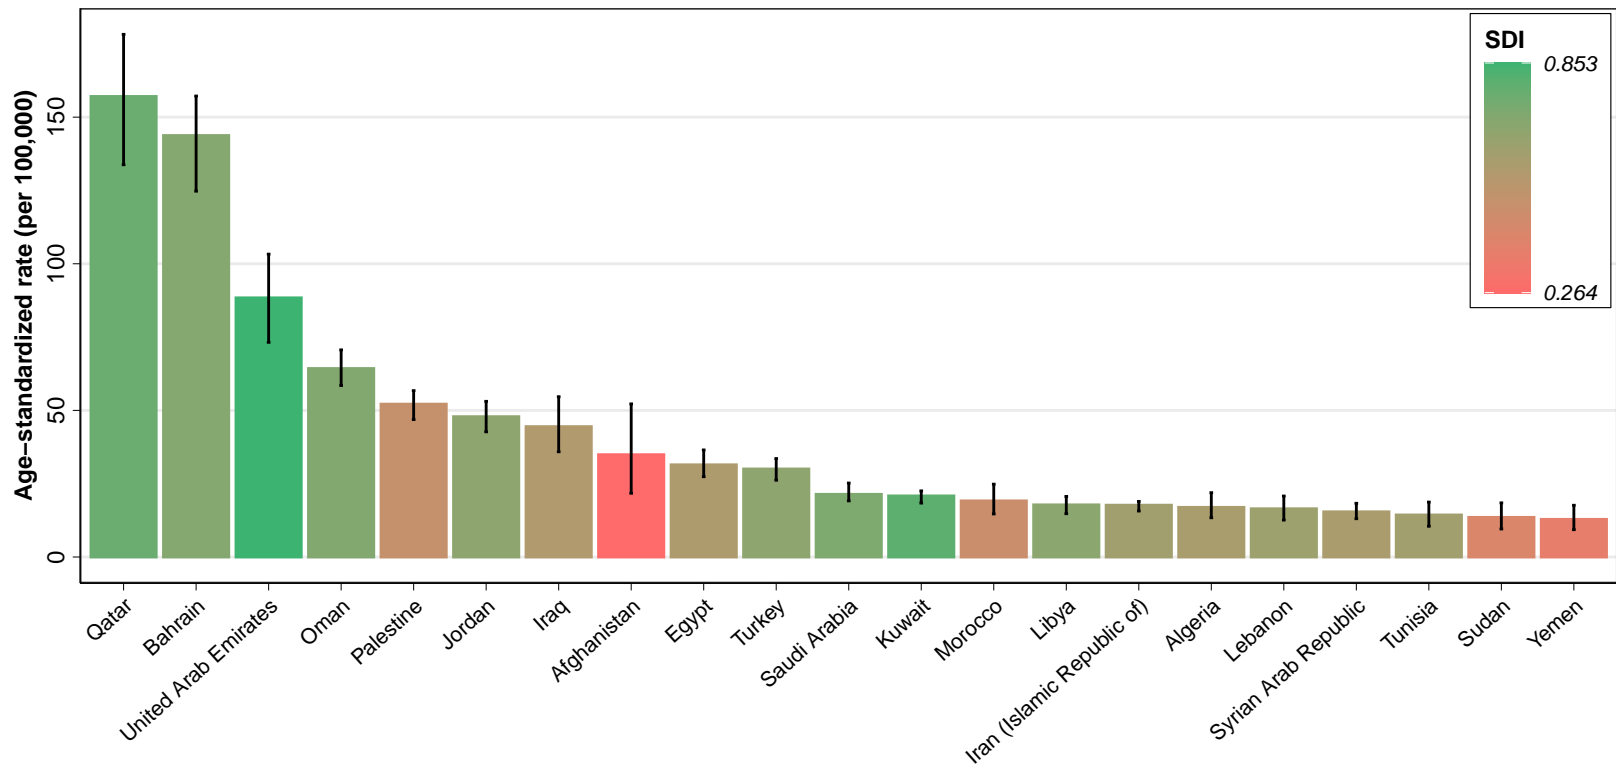

2019

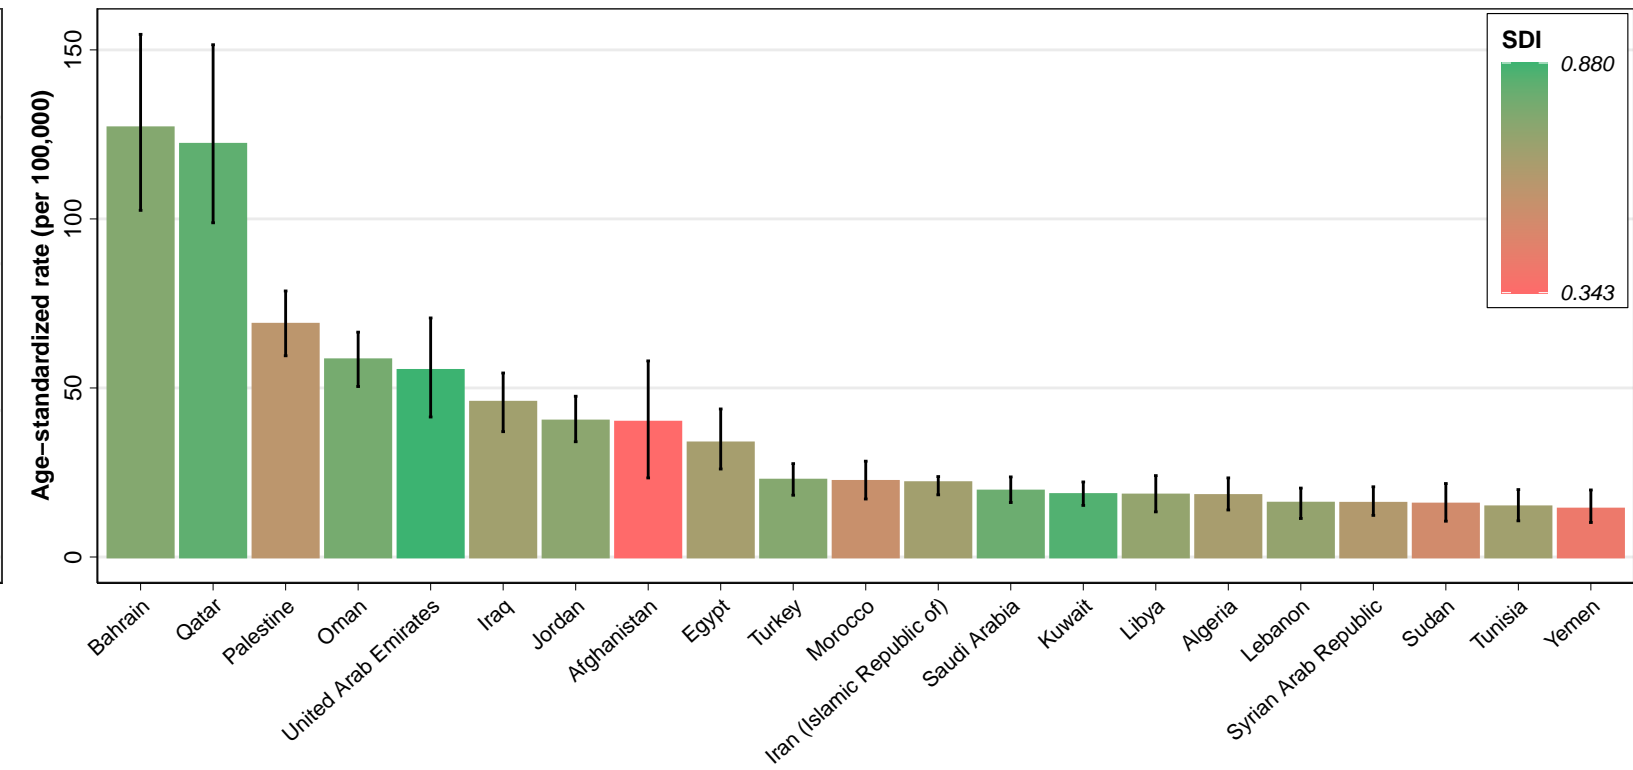

Supplement: MOESM6 [file 26600498]
