# Supplementary material for: Burden of type 2 diabetes mellitus and its risk factors in North Africa and the Middle East, 1990–2019: findings from the Global Burden of Disease study 2019
Source: Springer Nature journal article supplement (doi:10.1186/s12889-023-16540-8), 2024-01-05
Supplement: MOESM7 [file 26600498]

Both

Female

Male

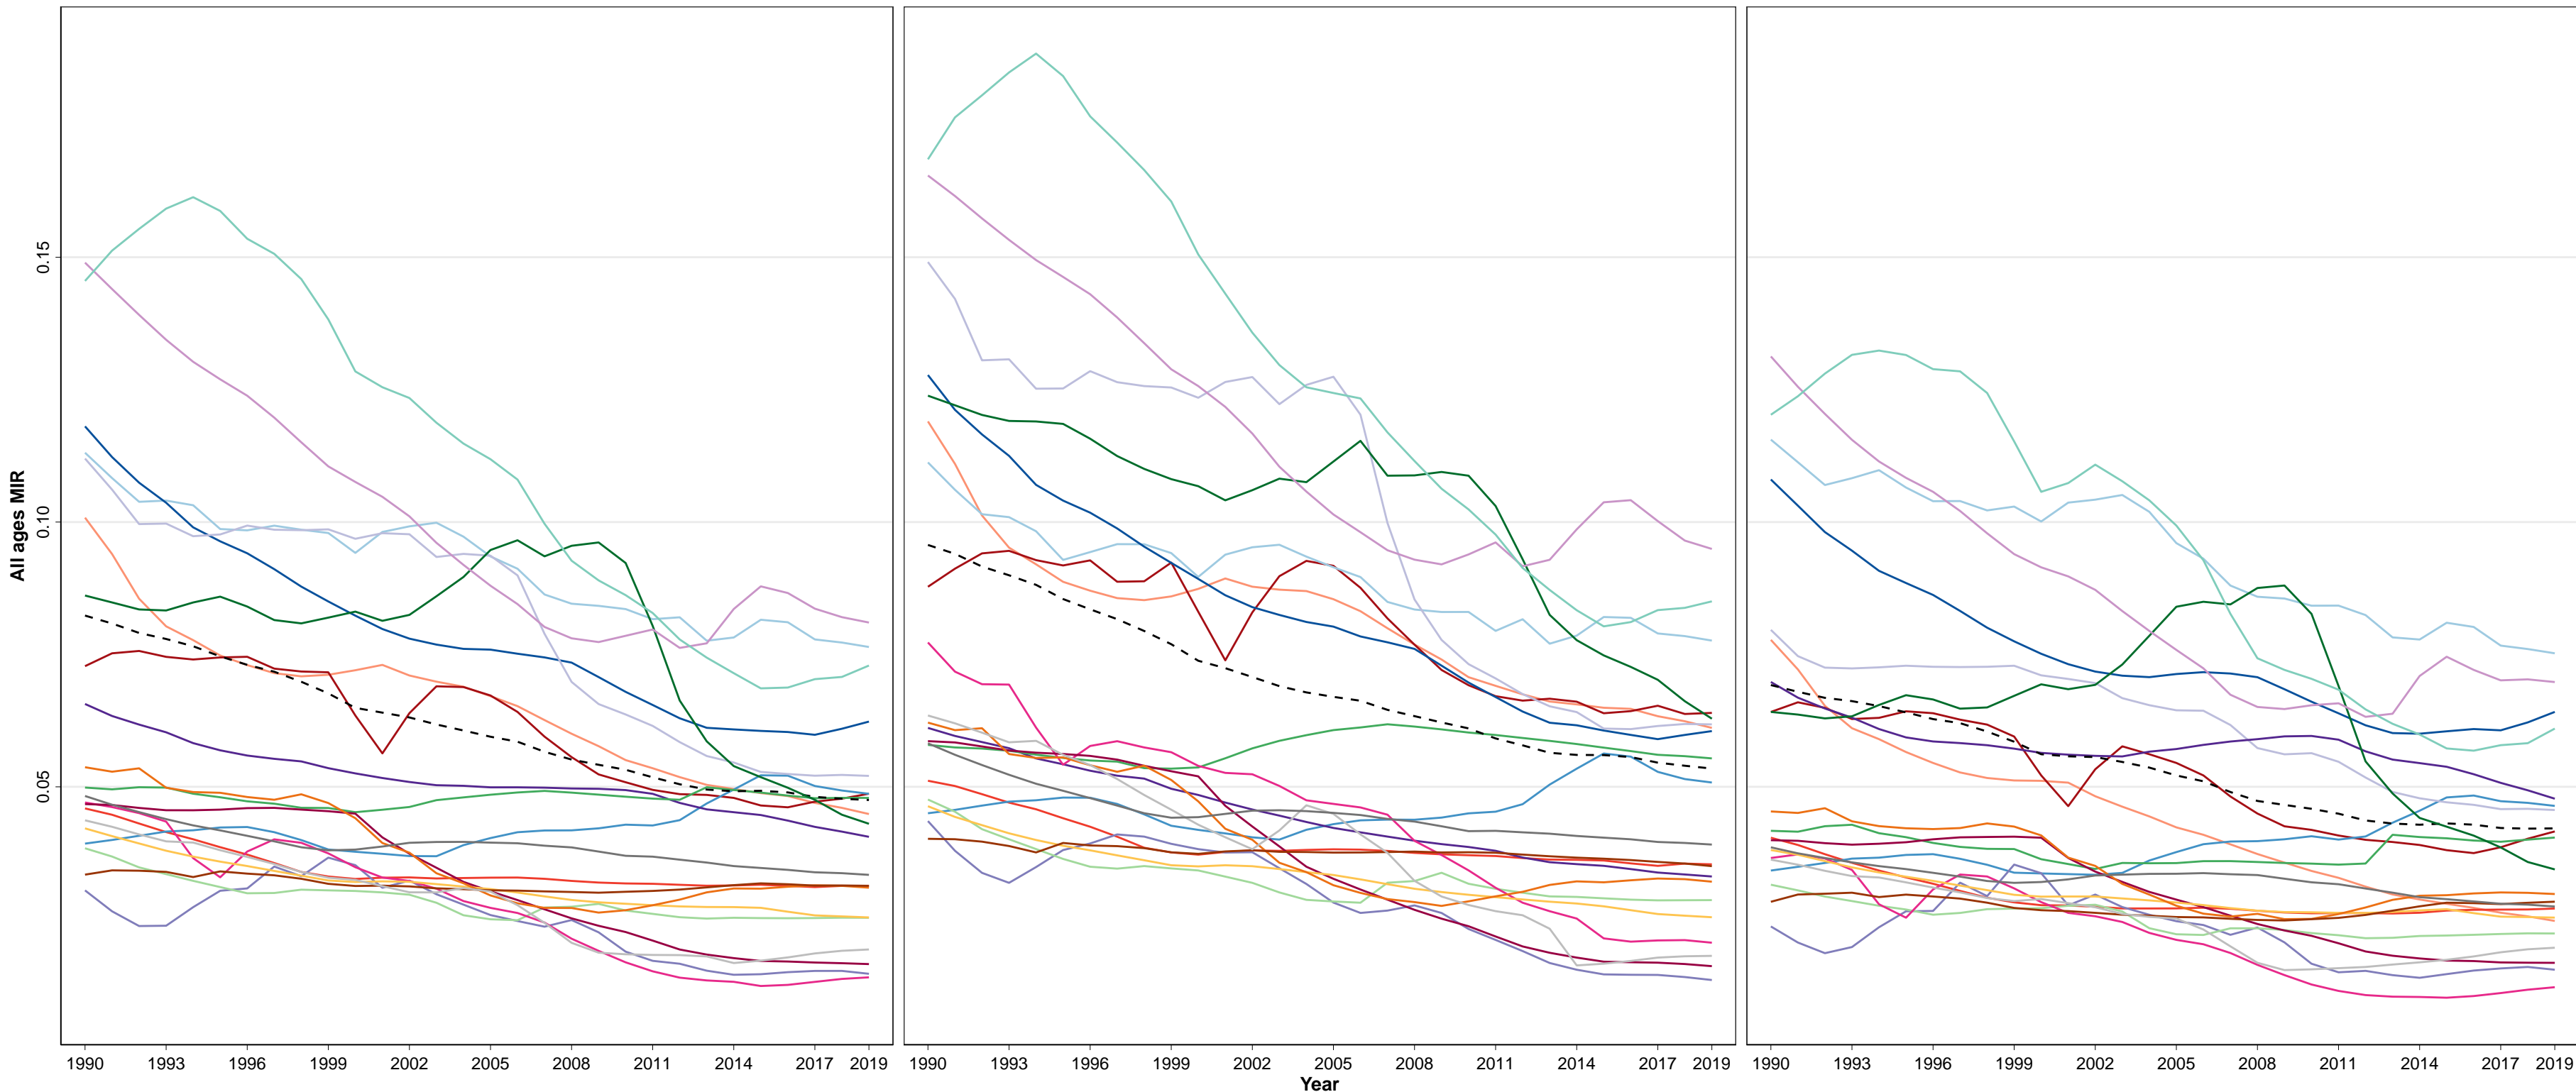

- Afghanistan
- Bahrain
- Iran (Islamic Republic of)
- Jordan
- Lebanon
- Morocco
- Oman
- Qatar
- Sudan
- Tunisia
- United Arab Emirates
- Algeria
- Egypt
- Iraq
- Kuwait
- Libya
- - North Africa and Middle East
- Palestine
- Saudi Arabia
- Syrian Arab Republic
- Turkey
- Yemen
