# Supplementary material for: Burden of type 2 diabetes mellitus and its risk factors in North Africa and the Middle East, 1990–2019: findings from the Global Burden of Disease study 2019
Source: Springer Nature journal article supplement (doi:10.1186/s12889-023-16540-8), 2024-01-05
Supplement: MOESM8 [file 26600498]

### Metabolic risks

Deaths 1990

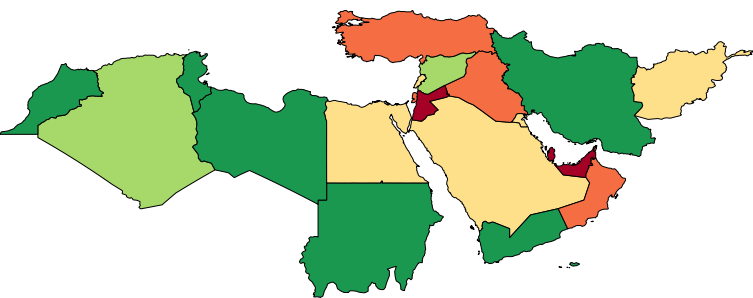

2019

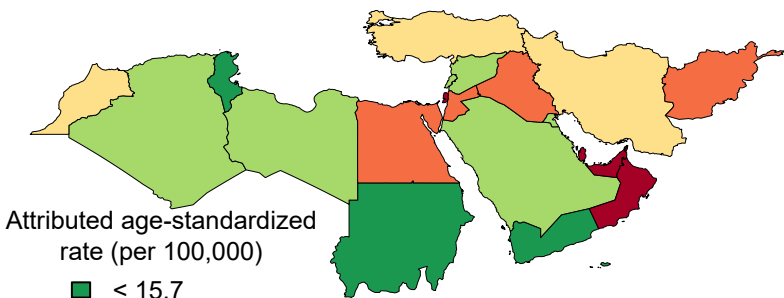

Attributed age-standardized rate (per 100,000)

- < 15.7
- [15.7 to 19.9)
- [19.9 to 31.7)
- [31.7 to 54.9)
- ≥ 54.9

DALYs 1990

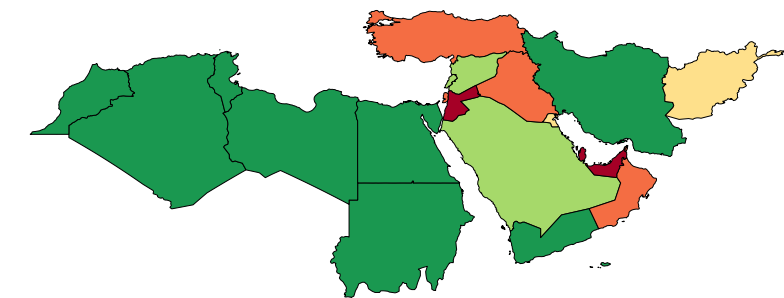

2019

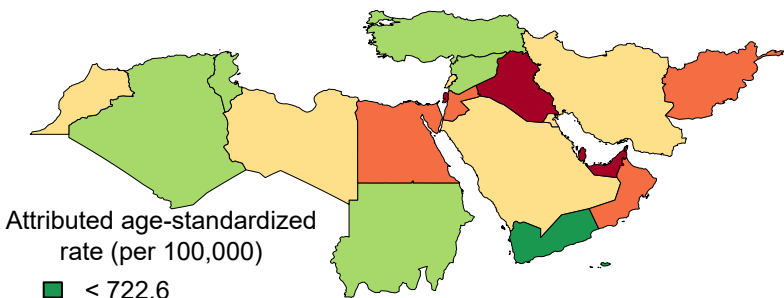

Attributed age-standardized rate (per 100,000)

- < 722.6
- [722.6 to 953.9)
- [953.9 to 1140.5)
- [1140.5 to 1623.4)
- ≥ 1623.4

### Behavioral risks

Deaths 1990

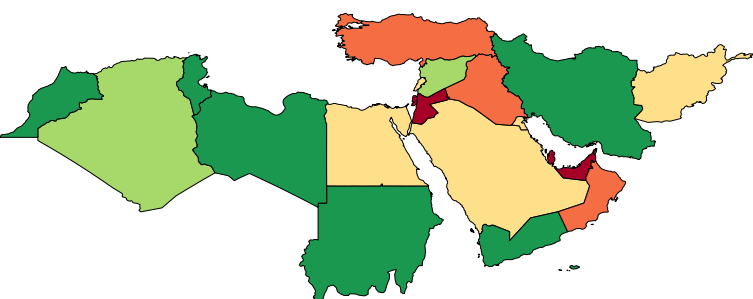

2019

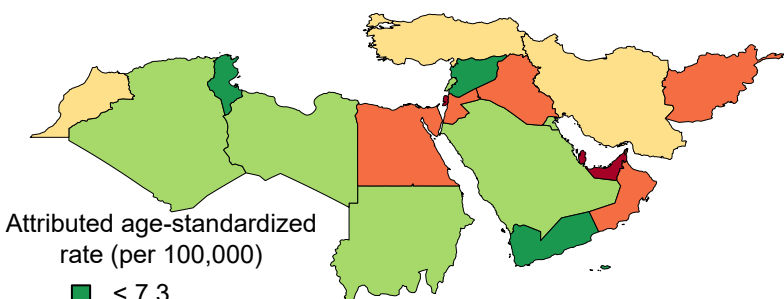

Attributed age-standardized rate (per 100,000)

- < 7.3
- [7.3 to 9.1)
- [9.1 to 14.4)
- [14.4 to 25.3)
- ≥ 25.3

DALYs 1990

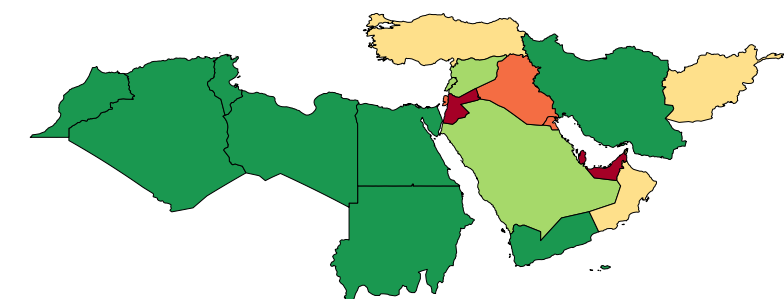

2019

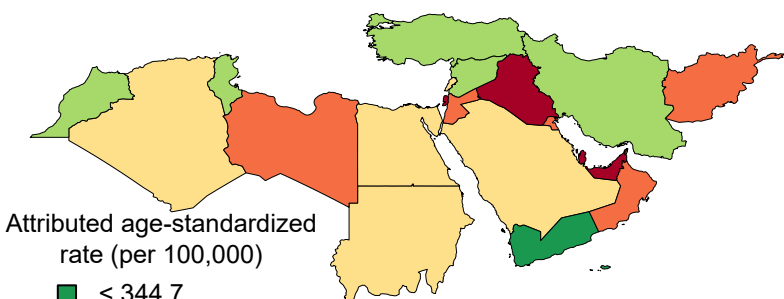

Attributed age-standardized rate (per 100,000)

- < 344.7
- [344.7 to 416.6)
- [416.6 to 541.3)
- [541.3 to 782.9)
- ≥ 782.9

### Environmental/occupational

Deaths 1990

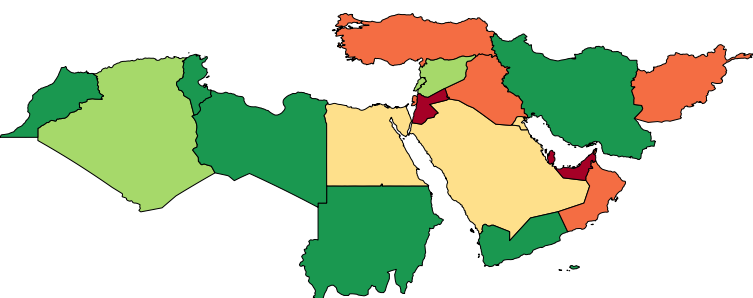

2019

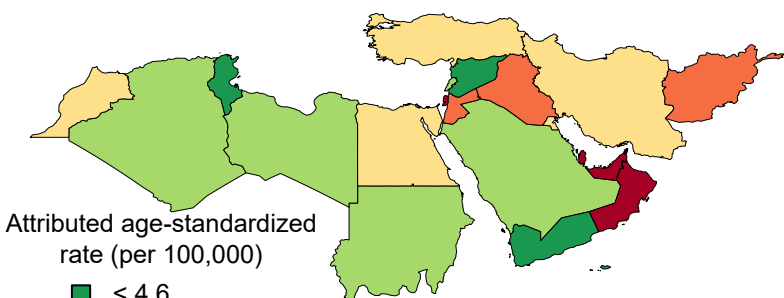

Attributed age-standardized rate (per 100,000)

- < 4.6
- [4.6 to 6.3)
- [6.3 to 10.3)
- [10.3 to 16.6)
- ≥ 16.6

DALYs 1990

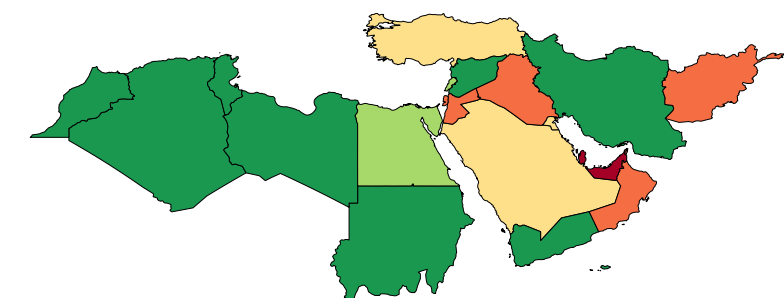

2019

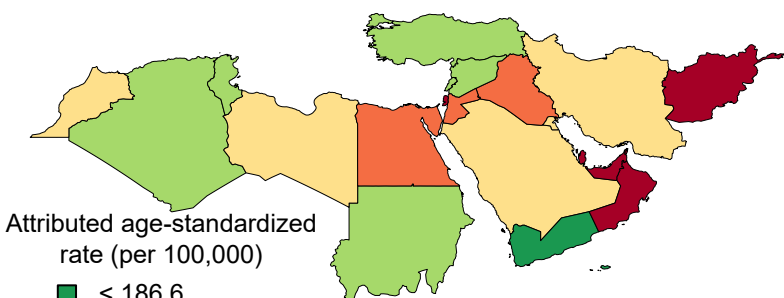

Attributed age-standardized rate (per 100,000)

- < 186.6
- [186.6 to 237.5)
- [237.5 to 314.9)
- [314.9 to 457.6)
- ≥ 457.6
